# Supplementary material for: UCHL1 Is a Putative Tumor Suppressor in Ovarian Cancer Cells and Contributes to Cisplatin Resistance
Source: PubMed Central journal article supplement — J Cancer. 2013 Sep 27;4(8):662–70. doi: 10.7150/jca.6641 (PMC3805994; doi:10.7150/jca.6641), 2013-09-27
Supplement: jcav04p0662s1.pdf [file jcav04p0662s1.pdf]

Suppl. Table 1. Differentially expressed genes between A2780-shUCL1 and A2780-control with greater than 2-fold changes.

| Probe Set ID | Fold change([A2780-shUCL1] vs [A2780-control]) | Regulation([A2780-shUCL1] vs [A2780-control]) | [A2780-shUCL1](raw) | [A2780-control](raw) | Gene Symbol | Gene Title                                                   |
|--------------|------------------------------------------------|-----------------------------------------------|---------------------|----------------------|-------------|--------------------------------------------------------------|
| 200011_s_at  | 2.46                                           | down                                          | 1242.71             | 2982.64              | ARF3        | ADP-ribosylation factor 3                                    |
| 200646_s_at  | 4.27                                           | down                                          | 53.64               | 223.10               | NUCB1       | nucleobindin 1                                               |
| 200648_s_at  | 2.26                                           | down                                          | 241.69              | 532.22               | GLUL        | glutamate-ammonia ligase (glutamine synthetase)              |
| 200649_at    | 2.06                                           | up                                            | 490.10              | 232.35               | NUCB1       | nucleobindin 1                                               |
| 200795_at    | 28.29                                          | up                                            | 501.81              | 17.30                | SPARCL1     | SPARC-like 1 (hevin)                                         |
| 200872_at    | 3.07                                           | up                                            | 1160.58             | 368.81               | S100A10     | S100 calcium binding protein A10                             |
| 200917_s_at  | 3.42                                           | down                                          | 99.58               | 331.95               | SRPR        | signal recognition particle receptor (docking protein)       |
| 200951_s_at  | 3.71                                           | up                                            | 1598.80             | 420.69               | CCND2       | cyclin D2                                                    |
| 200952_s_at  | 4.31                                           | up                                            | 867.35              | 196.03               | CCND2       | cyclin D2                                                    |
| 200953_s_at  | 2.51                                           | up                                            | 11758.06            | 4562.37              | CCND2       | cyclin D2                                                    |
| 201028_s_at  | 2.49                                           | up                                            | 567.91              | 222.15               | CD99        | CD99 molecule                                                |
| 201029_s_at  | 4.21                                           | up                                            | 1929.80             | 446.92               | CD99        | CD99 molecule                                                |
| 201176_s_at  | 2.04                                           | down                                          | 2074.24             | 4115.80              | ARCN1       | archain 1                                                    |
| 201205_at    | 6.95                                           | down                                          | 43.54               | 294.98               |             |                                                              |
| 201229_s_at  | 2.15                                           | up                                            | 982.00              | 445.77               | ARIH2       | ariadne homolog 2 (Drosophila)                               |
| 201247_at    | 5.72                                           | up                                            | 465.38              | 79.29                | SREBF2      | sterol regulatory element binding transcription factor 2     |
| 201248_s_at  | 2.40                                           | up                                            | 616.63              | 250.92               | SREBF2      | sterol regulatory element binding transcription factor 2     |
| 201282_at    | 8.85                                           | down                                          | 33.70               | 290.72               | OGDH        | oxoglutarate (alpha-ketoglutarate) dehydrogenase (lipoamide) |

|             |       |      |         |          |             |                                                                     |
|-------------|-------|------|---------|----------|-------------|---------------------------------------------------------------------|
| 201295_s_at | 2.37  | up   | 320.47  | 131.88   | WSB1        | WD repeat and SOCS box-containing 1                                 |
| 201315_x_at | 3.40  | down | 491.51  | 1630.27  | IFITM2      | interferon induced transmembrane protein 2 (1-8D)                   |
| 201319_at   | 2.81  | up   | 7782.10 | 2697.39  | MYL12A      | myosin, light chain 12A, regulatory, non-sarcomeric                 |
| 201335_s_at | 40.04 | down | 6.10    | 238.23   | ARHGEF12    | Rho guanine nucleotide exchange factor (GEF) 12                     |
| 201380_at   | 3.91  | down | 290.94  | 1108.74  | CRTAP       | cartilage associated protein                                        |
| 201383_s_at | 2.42  | down | 197.20  | 465.51   | LOC10013316 | similar to neighbor of BRCA1 gene 1                                 |
| 201387_s_at | 8.64  | down | 1805.36 | 15207.14 | UCHL1       | ubiquitin carboxyl-terminal esterase L1 (ubiquitin thiolesterase)   |
| 201411_s_at | 2.00  | down | 609.66  | 1191.19  | PLEKHB2     | pleckstrin homology domain containing, family B (evectins) member 2 |
| 201416_at   | 8.64  | up   | 3988.74 | 450.06   | SOX4        | SRY (sex determining region Y)-box 4                                |
| 201417_at   | 4.27  | up   | 9466.27 | 2159.42  | SOX4        | SRY (sex determining region Y)-box 4                                |
| 201513_at   | 2.41  | down | 223.18  | 524.73   | TSN         | translin                                                            |
| 201578_at   | 2.17  | up   | 318.64  | 143.37   | PODXL       | podocalyxin-like                                                    |
| 201601_x_at | 3.88  | down | 187.61  | 709.65   | IFITM1      | interferon induced transmembrane protein 1 (9-27)                   |
| 201602_s_at | 3.10  | up   | 669.50  | 210.30   | PPP1R12A    | protein phosphatase 1, regulatory (inhibitor) subunit 12A           |
| 201641_at   | 9.83  | down | 34.96   | 335.01   | BST2        | bone marrow stromal cell antigen 2                                  |
| 201647_s_at | 2.09  | down | 202.73  | 412.18   | SCARB2      | scavenger receptor class B, member 2                                |
| 201669_s_at | 3.00  | up   | 3734.15 | 1211.64  | MARCKS      | myristoylated alanine-rich protein kinase C substrate               |

|             |       |      |         |        |         |                                                                                                  |
|-------------|-------|------|---------|--------|---------|--------------------------------------------------------------------------------------------------|
| 201768_s_at | 2.19  | up   | 2003.33 | 891.53 | CLINT1  | clathrin interactor 1                                                                            |
| 201799_s_at | 2.17  | up   | 781.02  | 351.62 | OSBP    | oxysterol binding protein                                                                        |
| 201801_s_at | 2.62  | up   | 322.68  | 120.29 | SLC29A1 | solute carrier family 29 (nucleoside transporters), member 1                                     |
| 201860_s_at | 2.08  | up   | 153.78  | 72.17  | PLAT    | plasminogen activator, tissue                                                                    |
| 201939_at   | 3.34  | up   | 489.92  | 143.12 | PLK2    | polo-like kinase 2 (Drosophila)                                                                  |
| 201942_s_at | 2.06  | up   | 385.60  | 182.16 | CPD     | carboxypeptidase D                                                                               |
| 202019_s_at | 2.29  | up   | 645.33  | 274.78 | LANCL1  | LanC lantibiotic synthetase component C-like 1 (bacterial)                                       |
| 202085_at   | 2.13  | down | 465.45  | 966.16 | TJP2    | tight junction protein 2 (zona occludens 2)                                                      |
| 202091_at   | 2.41  | down | 105.63  | 248.36 | ARL2BP  | ADP-ribosylation factor-like 2 binding protein                                                   |
| 202288_at   | 2.36  | down | 128.07  | 294.85 | FRAP1   | FK506 binding protein 12-rapamycin associated protein 1                                          |
| 202310_s_at | 2.71  | up   | 311.97  | 112.04 | COL1A1  | collagen, type I, alpha 1                                                                        |
| 202339_at   | 26.31 | up   | 285.29  | 10.57  | SYMPK   | symplekin                                                                                        |
| 202364_at   | 2.16  | down | 383.85  | 808.71 | MXI1    | MAX interactor 1                                                                                 |
| 202478_at   | 2.28  | up   | 1165.48 | 497.39 | TRIB2   | tribbles homolog 2 (Drosophila)                                                                  |
| 202479_s_at | 2.60  | up   | 655.39  | 245.67 | TRIB2   | tribbles homolog 2 (Drosophila)                                                                  |
| 202490_at   | 4.97  | down | 28.60   | 138.69 | IKBKAP  | inhibitor of kappa light polypeptide gene enhancer in B-cells, kinase complex-associated protein |
| 202512_s_at | 2.14  | down | 355.12  | 740.95 | ATG5    | ATG5 autophagy related 5 homolog (S. cerevisiae)                                                 |
| 202517_at   | 13.14 | up   | 592.00  | 43.91  | CRMP1   | collapsin response mediator protein 1                                                            |

|             |       |      |         |         |          |                                                        |
|-------------|-------|------|---------|---------|----------|--------------------------------------------------------|
| 202547_s_at | 2.16  | up   | 331.58  | 149.99  | ARHGEF7  | Rho guanine nucleotide exchange factor (GEF) 7         |
| 202570_s_at | 2.09  | up   | 479.24  | 223.36  | DLGAP4   | discs, large (Drosophila) homolog-associated protein 4 |
| 202638_s_at | 3.23  | up   | 162.60  | 49.04   | ICAM1    | intercellular adhesion molecule 1                      |
| 202657_s_at | 2.01  | down | 1008.37 | 1977.31 | SERTAD2  | SERTA domain containing 2                              |
| 202719_s_at | 10.15 | down | 33.32   | 329.70  | TES      | testis derived transcript (3 LIM domains)              |
| 202734_at   | 2.00  | up   | 424.63  | 206.96  | TRIP10   | thyroid hormone receptor interactor 10                 |
| 202738_s_at | 2.37  | down | 382.34  | 882.96  | PHKB     | phosphorylase kinase, beta                             |
| 202759_s_at | 3.19  | up   | 259.45  | 79.29   | AKAP2    | A kinase (PRKA) anchor protein 2                       |
| 202766_s_at | 2.87  | up   | 453.79  | 153.94  | FBN1     | fibrillin 1                                            |
| 202793_at   | 9.77  | up   | 266.34  | 26.57   | LPCAT3   | lysophosphatidylcholine acyltransferase 3              |
| 202852_s_at | 2.08  | down | 1133.54 | 2300.51 | FLJ11506 | alpha- and gamma-adaptin-binding protein p34           |
| 202896_s_at | 2.54  | up   | 603.95  | 231.53  | SIRPA    | signal-regulatory protein alpha                        |
| 203027_s_at | 22.84 | down | 9.80    | 218.19  | MVD      | mevalonate (diphospho) decarboxylase                   |
| 203037_s_at | 3.42  | down | 80.03   | 266.85  | MTSS1    | metastasis suppressor 1                                |
| 203058_s_at | 5.76  | down | 294.56  | 1653.98 | PAPSS2   | 3'-phosphoadenosine 5'-phosphosulfate synthase 2       |
| 203059_s_at | 2.66  | down | 240.58  | 623.95  | PAPSS2   | 3'-phosphoadenosine 5'-phosphosulfate synthase 2       |
| 203060_s_at | 5.39  | down | 789.98  | 4152.46 | PAPSS2   | 3'-phosphoadenosine 5'-phosphosulfate synthase 2       |

|             |       |      |          |         |          |                                                                   |
|-------------|-------|------|----------|---------|----------|-------------------------------------------------------------------|
| 203065_s_at | 67.01 | up   | 278.78   | 4.06    | CAV1     | caveolin 1, caveolae protein, 22kDa                               |
| 203139_at   | 55.08 | up   | 241.91   | 4.28    | DAPK1    | death-associated protein kinase 1                                 |
| 203163_at   | 2.06  | down | 111.12   | 223.18  | KATNB1   | katanin p80 (WD repeat containing) subunit B 1                    |
| 203184_at   | 8.80  | up   | 11144.77 | 1234.73 | FBN2     | fibrillin 2                                                       |
| 203186_s_at | 2.55  | down | 432.32   | 1072.90 | S100A4   | S100 calcium binding protein A4                                   |
| 203216_s_at | 2.23  | up   | 775.56   | 339.04  | MYO6     | myosin VI                                                         |
| 203222_s_at | 2.05  | up   | 414.38   | 196.93  | TLE1     | transducin-like enhancer of split 1 (E(sp1) homolog, Drosophila)  |
| 203234_at   | 2.19  | down | 185.47   | 396.87  | UPP1     | uridine phosphorylase 1                                           |
| 203260_at   | 2.01  | up   | 212.21   | 102.74  | HDCC2    | HD domain containing 2                                            |
| 203285_s_at | 3.50  | down | 242.37   | 826.97  | HS2ST1   | heparan sulfate 2-O-sulfotransferase 1                            |
| 203304_at   | 3.94  | up   | 295.34   | 73.16   | BAMBI    | BMP and activin membrane-bound inhibitor homolog (Xenopus laevis) |
| 203364_s_at | 2.32  | down | 262.22   | 592.90  | KIAA0652 | KIAA0652                                                          |
| 203386_at   | 2.50  | down | 392.12   | 954.60  | TBC1D4   | TBC1 domain family, member 4                                      |
| 203412_at   | 2.46  | up   | 968.46   | 383.90  | LZTR1    | leucine-zipper-like transcription regulator 1                     |
| 203434_s_at | 3.28  | down | 813.80   | 2603.94 | MME      | membrane metallo-endopeptidase                                    |
| 203435_s_at | 3.32  | down | 714.77   | 2311.41 | MME      | membrane metallo-endopeptidase                                    |
| 203456_at   | 2.16  | down | 262.78   | 554.68  | PRAF2    | PRA1 domain family, member 2                                      |
| 203463_s_at | 2.45  | down | 139.02   | 331.41  | EPN2     | epsin 2                                                           |
| 203468_at   | 2.24  | down | 262.60   | 572.67  | CDK10    | cyclin-dependent kinase 10                                        |
| 203485_at   | 2.23  | up   | 403.66   | 176.15  | RTN1     | reticulon 1                                                       |

|             |       |      |         |         |         |                                                                                        |
|-------------|-------|------|---------|---------|---------|----------------------------------------------------------------------------------------|
| 203509_at   | 2.12  | down | 575.56  | 1187.16 | SORL1   | sortilin-related receptor, L(DLR class) A repeats-containing                           |
| 203526_s_at | 2.07  | up   | 488.33  | 230.45  | APC     | adenomatous polyposis coli                                                             |
| 203561_at   | 30.40 | up   | 78.91   | 2.53    | FCGR2A  | Fc fragment of IgG, low affinity IIa, receptor (CD32)                                  |
| 203562_at   | 9.78  | down | 12.13   | 115.66  | FEZ1    | fasciculation and elongation protein zeta 1 (zygin I)                                  |
| 203573_s_at | 2.01  | up   | 502.01  | 243.15  | RABGGTA | Rab geranylgeranyltransferase, alpha subunit                                           |
| 203636_at   | 5.60  | down | 1090.51 | 5952.75 | MID1    | midline 1 (Opitz                                                                       |
| 203637_s_at | 4.06  | down | 1350.21 | 5339.46 | MID1    | midline 1 (Opitz                                                                       |
| 203638_s_at | 2.38  | up   | 452.54  | 185.62  | FGFR2   | fibroblast growth factor receptor 2                                                    |
| 203666_at   | 2.03  | up   | 241.23  | 115.74  | CXCL12  | chemokine (C-X-C motif) ligand 12 (stromal cell-derived factor 1)                      |
| 203695_s_at | 2.10  | down | 174.60  | 356.69  | DFNA5   | deafness, autosomal dominant 5                                                         |
| 203697_at   | 9.44  | up   | 236.87  | 24.46   | FRZB    | frizzled-related protein                                                               |
| 203729_at   | 2.77  | up   | 1010.81 | 355.65  | EMP3    | epithelial membrane protein 3                                                          |
| 203746_s_at | 2.29  | down | 1300.11 | 2900.17 | HCCS    | holocytochrome c synthase (cytochrome c heme-lyase)                                    |
| 203772_at   | 2.40  | up   | 207.15  | 84.06   | BLVRA   | biliverdin reductase A                                                                 |
| 203785_s_at | 2.04  | up   | 937.94  | 448.85  | DDX28   | DEAD (Asp-Glu-Ala-Asp) box polypeptide 28                                              |
| 203788_s_at | 2.39  | up   | 220.45  | 90.10   | SEMA3C  | sema domain, immunoglobulin domain (Ig), short basic domain, secreted, (semaphorin) 3C |
| 203792_x_at | 2.37  | up   | 309.85  | 127.27  | PCGF2   | polycomb group ring finger 2                                                           |

|             |      |      |         |         |         |                                                                                                                        |
|-------------|------|------|---------|---------|---------|------------------------------------------------------------------------------------------------------------------------|
| 203864_s_at | 3.01 | up   | 165.87  | 53.80   | ACTN2   | actinin, alpha 2                                                                                                       |
| 203870_at   | 2.03 | down | 548.72  | 1086.52 | USP46   | ubiquitin specific peptidase 46                                                                                        |
| 203881_s_at | 2.58 | down | 2155.58 | 5431.12 | DMD     | dystrophin                                                                                                             |
| 203936_s_at | 2.31 | up   | 410.94  | 173.37  | MMP9    | matrix metalloproteinase 9 (gelatinase B, 92kDa gelatinase, 92kDa type IV collagenase)                                 |
| 203940_s_at | 4.94 | up   | 133.88  | 26.42   | VASH1   | vasohibin 1                                                                                                            |
| 203961_at   | 3.08 | down | 626.69  | 1882.20 | NEBL    | nebulette                                                                                                              |
| 203962_s_at | 2.46 | down | 762.44  | 1829.36 | NEBL    | nebulette                                                                                                              |
| 204028_s_at | 2.01 | down | 549.85  | 1077.15 | RABGAP1 | RAB GTPase activating protein 1                                                                                        |
| 204029_at   | 2.70 | up   | 338.77  | 122.26  | CELSR2  | cadherin, EGF LAG seven-pass G-type receptor 2 (flamingo homolog, Drosophila)                                          |
| 204048_s_at | 2.19 | down | 374.18  | 797.19  | PHACTR2 | phosphatase and actin regulator 2                                                                                      |
| 204066_s_at | 2.56 | up   | 906.08  | 344.85  | AGAP1   | ArfGAP with GTPase domain, ankyrin repeat and PH domain 1                                                              |
| 204070_at   | 3.75 | down | 67.92   | 248.04  | RARRES3 | retinoic acid receptor responder (tazarotene induced) 3                                                                |
| 204123_at   | 2.37 | up   | 645.63  | 265.13  | LIG3    | ligase III, DNA, ATP-dependent                                                                                         |
| 204151_x_at | 2.02 | up   | 782.06  | 376.61  | AKR1C1  | aldo-keto reductase family 1, member C1 (dihydrodiol dehydrogenase 1; 20-alpha (3-alpha)-hydroxysteroid dehydrogenase) |
| 204248_at   | 2.01 | up   | 1735.53 | 842.36  | GNA11   | guanine nucleotide binding protein (G protein), alpha 11 (Gq class)                                                    |
| 204257_at   | 2.71 | up   | 618.13  | 221.99  | FADS3   | fatty acid desaturase 3                                                                                                |

|             |        |      |         |         |        |                                                                               |
|-------------|--------|------|---------|---------|--------|-------------------------------------------------------------------------------|
| 204262_s_at | 2.18   | down | 159.95  | 340.74  | PSEN2  | presenilin 2 (Alzheimer disease 4)                                            |
| 204268_at   | 4.44   | down | 748.00  | 3235.53 | S100A2 | S100 calcium binding protein A2                                               |
| 204306_s_at | 2.24   | up   | 1065.98 | 464.57  | CD151  | CD151 molecule (Raph blood group)                                             |
| 204317_at   | 2.30   | down | 113.34  | 254.33  | GTSE1  | G-2 and S-phase expressed 1                                                   |
| 204333_s_at | 2.19   | up   | 213.01  | 94.69   | AGA    | aspartylglucosaminidase                                                       |
| 204361_s_at | 2.22   | up   | 345.57  | 151.72  | SKAP2  | src kinase associated phosphoprotein 2                                        |
| 204387_x_at | 2.03   | down | 592.61  | 1171.14 | MRP63  | mitochondrial ribosomal protein 63                                            |
| 204417_at   | 3.14   | up   | 2329.57 | 723.64  | GALC   | galactosylceramidase                                                          |
| 204445_s_at | 5.28   | down | 28.02   | 144.22  | ALOX5  | arachidonate 5-lipoxygenase                                                   |
| 204448_s_at | 2.01   | up   | 569.46  | 276.41  | PDCL   | phosducin-like                                                                |
| 204450_x_at | 5.67   | down | 28.69   | 158.48  | APOA1  | apolipoprotein A-I                                                            |
| 204465_s_at | 2.24   | down | 3590.65 | 7836.37 | INA    | internexin neuronal intermediate filament protein, alpha                      |
| 204475_at   | 163.03 | down | 44.85   | 7128.93 | MMP1   | matrix metalloproteinase 1 (interstitial collagenase)                         |
| 204479_at   | 2.16   | down | 446.95  | 940.26  | OSTF1  | osteoclast stimulating factor 1                                               |
| 204514_at   | 3.52   | up   | 716.11  | 198.22  | DPH2   | DPH2 homolog (S. cerevisiae)                                                  |
| 204529_s_at | 6.71   | down | 163.40  | 1068.40 | TOX    | thymocyte selection-associated high mobility group box                        |
| 204545_at   | 4.83   | down | 84.40   | 397.41  | PEX6   | peroxisomal biogenesis factor 6                                               |
| 204549_at   | 2.08   | up   | 529.53  | 248.24  | IKBKE  | inhibitor of kappa light polypeptide gene enhancer in B-cells, kinase epsilon |
| 204562_at   | 3.58   | up   | 335.96  | 91.51   | IRF4   | interferon regulatory factor 4                                                |



|             |       |      |         |         |            |                                                                                       |
|-------------|-------|------|---------|---------|------------|---------------------------------------------------------------------------------------|
| 204580_at   | 25.52 | down | 83.26   | 2071.53 | MMP12      | matrix metalloproteinase 12 (macrophage elastase)                                     |
| 204589_at   | 2.20  | up   | 328.80  | 145.64  | NUAK1      | NUAK family, SNF1-like kinase, 1                                                      |
| 204614_at   | 3.28  | up   | 128.61  | 38.26   | SERPINB2   | serpin peptidase inhibitor, clade B (ovalbumin), member 2                             |
| 204620_s_at | 2.96  | up   | 644.04  | 212.34  | VCAN       | versican                                                                              |
| 204646_at   | 2.08  | down | 183.53  | 372.82  | DPYD       | dihydropyrimidine dehydrogenase                                                       |
| 204655_at   | 3.13  | down | 512.85  | 1564.94 | CCL5       | chemokine (C-C motif) ligand 5                                                        |
| 204665_at   | 11.13 | down | 11.24   | 121.98  | P5-1000E10 | suppressor of IKK epsilon                                                             |
| 204666_s_at | 2.37  | down | 91.41   | 211.02  | P5-1000E10 | suppressor of IKK epsilon                                                             |
| 204668_at   | 15.06 | down | 17.26   | 253.40  | RNF24      | ring finger protein 24                                                                |
| 204716_at   | 2.51  | up   | 885.67  | 344.70  | CCDC6      | coiled-coil domain containing 6                                                       |
| 204720_s_at | 2.68  | down | 318.83  | 831.56  | DNAJC6     | DnaJ (Hsp40) homolog, subfamily C, member 6                                           |
| 204732_s_at | 3.43  | down | 100.88  | 337.67  | TRIM23     | tripartite motif-containing 23                                                        |
| 204751_x_at | 10.02 | up   | 127.80  | 12.43   | DSC2       | desmocollin 2                                                                         |
| 204759_at   | 3.19  | down | 78.43   | 243.88  | RCBTB2     | regulator of chromosome condensation (RCC1) and BTB (POZ) domain containing protein 2 |
| 204769_s_at | 2.06  | up   | 1374.79 | 649.20  | TAP2       | transporter 2, ATP-binding cassette, sub-family B (MDR)                               |
| 204827_s_at | 2.04  | down | 216.44  | 430.04  | CCNF       | cyclin F                                                                              |
| 204828_at   | 2.04  | down | 226.64  | 449.75  | RAD9A      | RAD9 homolog A (S. pombe)                                                             |
| 204838_s_at | 2.09  | up   | 365.54  | 170.50  | MLH3       | mutL homolog 3 (E. coli)                                                              |

|             |       |      |         |         |         |                                                                |
|-------------|-------|------|---------|---------|---------|----------------------------------------------------------------|
| 204854_at   | 13.41 | down | 14.47   | 189.29  | LEPREL2 | leprecan-like 2                                                |
| 204864_s_at | 3.60  | down | 52.64   | 184.66  | IL6ST   | interleukin 6 signal transducer (gp130, oncostatin M receptor) |
| 204884_s_at | 2.80  | down | 65.68   | 179.05  | HUS1    | HUS1 checkpoint homolog (S. pombe)                             |
| 204897_at   | 2.08  | down | 108.20  | 218.94  | PTGER4  | prostaglandin E receptor 4 (subtype EP4)                       |
| 204906_at   | 3.00  | up   | 308.62  | 100.38  | RPS6KA2 | ribosomal protein S6 kinase, 90kDa, polypeptide 2              |
| 204929_s_at | 22.88 | down | 9.82    | 219.03  | VAMP5   | vesicle-associated membrane protein 5 (myobrevin)              |
| 204955_at   | 2.28  | up   | 240.84  | 103.07  | SRPX    | sushi-repeat-containing protein, X-linked                      |
| 204958_at   | 7.46  | up   | 242.92  | 31.73   | PLK3    | polo-like kinase 3 (Drosophila)                                |
| 205002_at   | 5.47  | down | 40.18   | 214.20  | AHDC1   | AT hook, DNA binding motif, containing 1                       |
| 205013_s_at | 16.09 | down | 14.59   | 228.86  | ADORA2A | adenosine A2a receptor                                         |
| 205031_at   | 6.41  | down | 73.34   | 458.54  | EFNB3   | ephrin-B3                                                      |
| 205032_at   | 2.42  | up   | 335.62  | 135.06  | ITGA2   | integrin, alpha 2 (CD49B, alpha 2 subunit of VLA-2 receptor)   |
| 205080_at   | 4.26  | up   | 155.90  | 35.72   | RARB    | retinoic acid receptor, beta                                   |
| 205098_at   | 2.27  | up   | 3447.67 | 1481.86 | CCR1    | chemokine (C-C motif) receptor 1                               |
| 205160_at   | 2.10  | down | 205.09  | 420.05  | PEX11A  | Peroxisomal biogenesis factor 11 alpha                         |
| 205167_s_at | 2.04  | down | 383.74  | 764.48  | CDC25C  | cell division cycle 25 homolog C (S. pombe)                    |
| 205203_at   | 10.36 | down | 26.26   | 265.20  | PLD1    | phospholipase D1, phosphatidylcholine-specific                 |

|             |       |      |         |         |         |                                                                         |
|-------------|-------|------|---------|---------|---------|-------------------------------------------------------------------------|
| 205212_s_at | 3.96  | down | 61.94   | 239.18  | ACAP1   | ArfGAP with coiled-coil, ankyrin repeat and PH domains 1                |
| 205214_at   | 2.07  | up   | 127.08  | 59.93   | STK17B  | serine                                                                  |
| 205218_at   | 3.44  | down | 439.61  | 1473.98 | POLR3F  | polymerase (RNA) III (DNA directed) polypeptide F, 39 kDa               |
| 205232_s_at | 49.63 | up   | 352.52  | 6.93    | PAFAH2  | platelet-activating factor acetylhydrolase 2, 40kDa                     |
| 205249_at   | 4.04  | up   | 319.90  | 77.25   | EGR2    | early growth response 2                                                 |
| 205262_at   | 10.14 | up   | 252.84  | 24.31   | KCNH2   | potassium voltage-gated channel, subfamily H (eag-related), member 2    |
| 205294_at   | 2.29  | down | 97.57   | 218.18  | BAIAP2  | BAI1-associated protein 2                                               |
| 205302_at   | 24.22 | up   | 98.42   | 3.96    | IGFBP1  | insulin-like growth factor binding protein 1                            |
| 205313_at   | 2.26  | up   | 394.02  | 170.02  | HNF1B   | HNF1 homeobox B                                                         |
| 205322_s_at | 3.67  | up   | 605.76  | 161.08  | MTF1    | metal-regulatory transcription factor 1                                 |
| 205369_x_at | 2.06  | up   | 462.74  | 219.52  | DBT     | dihydrolipoamide branched chain transacylase E2                         |
| 205539_at   | 3.54  | up   | 101.00  | 27.80   | AVIL    | advillin                                                                |
| 205571_at   | 2.21  | up   | 963.22  | 424.89  | LIPT1   | lipoyltransferase 1                                                     |
| 205625_s_at | 11.22 | up   | 82.40   | 7.16    | CALB1   | calbindin 1, 28kDa                                                      |
| 205643_s_at | 19.74 | up   | 228.59  | 11.29   | PPP2R2B | protein phosphatase 2 (formerly 2A), regulatory subunit B, beta isoform |
| 205656_at   | 2.92  | up   | 247.06  | 82.59   | PCDH17  | protocadherin 17                                                        |
| 205680_at   | 71.04 | down | 111.99  | 7756.97 | MMP10   | matrix metalloproteinase 10 (stromelysin 2)                             |
| 205694_at   | 2.02  | up   | 2824.59 | 1366.15 | TYRP1   | tyrosinase-related protein 1                                            |

|             |       |      |         |         |         |                                                                          |
|-------------|-------|------|---------|---------|---------|--------------------------------------------------------------------------|
| 205762_s_at | 2.70  | up   | 170.85  | 61.78   | DUS4L   | dihydrouridine synthase 4-like (S. cerevisiae)                           |
| 205774_at   | 2.07  | down | 740.98  | 1494.95 | F12     | coagulation factor XII (Hageman factor)                                  |
| 205802_at   | 2.29  | down | 344.40  | 768.33  | TRPC1   | transient receptor potential cation channel, subfamily C, member 1       |
| 205809_s_at | 2.02  | down | 558.03  | 1096.68 | WASL    | Wiskott-Aldrich syndrome-like                                            |
| 205828_at   | 35.08 | down | 130.71  | 4470.92 | MMP3    | matrix metalloproteinase 3 (stromelysin 1, progelatinase)                |
| 205831_at   | 3.05  | down | 70.98   | 211.05  | CD2     | CD2 molecule                                                             |
| 205837_s_at | 11.32 | down | 8.06    | 88.92   | GYPA    | glycophorin A (MNS blood group)                                          |
| 205847_at   | 2.30  | up   | 356.44  | 151.07  | PRSS22  | protease, serine, 22                                                     |
| 205856_at   | 2.05  | up   | 153.64  | 73.19   | SLC14A1 | solute carrier family 14 (urea transporter), member 1 (Kidd blood group) |
| 205865_at   | 2.04  | up   | 604.01  | 288.76  | ARID3A  | AT rich interactive domain 3A (BRIGHT-like)                              |
| 205927_s_at | 3.15  | up   | 211.26  | 65.31   | CTSE    | cathepsin E                                                              |
| 205943_at   | 8.39  | up   | 78.52   | 9.12    | TDO2    | tryptophan 2,3-dioxygenase                                               |
| 205991_s_at | 3.27  | up   | 225.95  | 67.40   | PRRX1   | paired related homeobox 1                                                |
| 206029_at   | 2.19  | up   | 1936.87 | 862.02  | ANKRD1  | ankyrin repeat domain 1 (cardiac muscle)                                 |
| 206037_at   | 2.03  | up   | 551.53  | 264.26  | CCBL1   | cysteine conjugate-beta lyase, cytoplasmic                               |
| 206081_at   | 2.30  | down | 117.90  | 263.87  | SLC24A1 | solute carrier family 24 (sodium                                         |
| 206086_x_at | 25.07 | up   | 226.03  | 8.79    | HFE     | hemochromatosis                                                          |

|             |       |      |         |        |           |                                                                                |
|-------------|-------|------|---------|--------|-----------|--------------------------------------------------------------------------------|
| 206109_at   | 3.27  | down | 45.94   | 146.37 | FUT1      | fucosyltransferase 1 (galactoside 2-alpha-L-fucosyltransferase, H blood group) |
| 206115_at   | 2.06  | up   | 285.44  | 135.27 | EGR3      | early growth response 3                                                        |
| 206163_at   | 48.00 | up   | 161.55  | 3.28   | MAB21L1   | mab-21-like 1 (C. elegans)                                                     |
| 206184_at   | 2.73  | down | 103.98  | 276.26 | CRKL      | v-crk sarcoma virus CT10 oncogene homolog (avian)-like                         |
| 206237_s_at | 6.27  | down | 76.60   | 468.29 | NRG1      | neuregulin 1                                                                   |
| 206241_at   | 26.73 | down | 7.71    | 200.85 | KPNA5     | karyopherin alpha 5 (importin alpha 6)                                         |
| 206279_at   | 3.22  | down | 86.94   | 272.54 | PRKY      | protein kinase, Y-linked                                                       |
| 206300_s_at | 2.58  | down | 45.38   | 114.19 | PTH1H     | parathyroid hormone-like hormone                                               |
| 206352_s_at | 2.14  | up   | 882.31  | 401.62 | PEX10     | peroxisomal biogenesis factor 10                                               |
| 206378_at   | 50.03 | up   | 133.81  | 2.61   | SCGB2A2   | secretoglobin, family 2A, member 2                                             |
| 206422_at   | 10.43 | up   | 3211.50 | 300.28 | GCG       | glucagon                                                                       |
| 206438_x_at | 3.69  | up   | 2248.22 | 593.59 | TCTN2     | tectonic family member 2                                                       |
| 206453_s_at | 3.34  | up   | 375.74  | 109.75 | NDRG2     | NDRG family member 2                                                           |
| 206457_s_at | 43.32 | up   | 170.49  | 3.84   | DIO1      | deiodinase, iodothyronine, type I                                              |
| 206483_at   | 2.41  | up   | 218.39  | 88.46  | LRRC6     | leucine rich repeat containing 6                                               |
| 206488_s_at | 39.96 | down | 9.52    | 370.68 | CD36      | CD36 molecule (thrombospondin receptor)                                        |
| 206500_s_at | 2.11  | up   | 843.05  | 390.14 | C14orf106 | chromosome 14 open reading frame 106                                           |
| 206536_s_at | 2.64  | up   | 233.77  | 86.34  | XIAP      | X-linked inhibitor of apoptosis                                                |
| 206558_at   | 2.73  | up   | 692.55  | 247.60 | SIM2      | single-minded homolog 2 (Drosophila)                                           |

|             |       |      |        |        |         |                                                                                       |
|-------------|-------|------|--------|--------|---------|---------------------------------------------------------------------------------------|
| 206669_at   | 2.22  | down | 82.34  | 178.36 | GAD1    | glutamate decarboxylase 1 (brain, 67kDa)                                              |
| 206674_at   | 18.43 | down | 11.74  | 211.05 | FLT3    | fms-related tyrosine kinase 3                                                         |
| 206748_s_at | 2.02  | down | 287.34 | 564.74 | SPAG9   | sperm associated antigen 9                                                            |
| 206766_at   | 2.28  | down | 80.69  | 179.48 | ITGA10  | integrin, alpha 10                                                                    |
| 206769_at   | 2.29  | down | 76.14  | 169.67 | TMSB4Y  | thymosin beta 4, Y-linked                                                             |
| 206828_at   | 2.76  | down | 117.86 | 317.13 | TXK     | TXK tyrosine kinase                                                                   |
| 206884_s_at | 62.58 | up   | 654.72 | 10.20  | SCEL    | sciellin                                                                              |
| 206891_at   | 2.02  | down | 206.47 | 407.63 | ACTN3   | actinin, alpha 3                                                                      |
| 206893_at   | 70.13 | up   | 165.42 | 2.30   | SALL1   | sal-like 1 (Drosophila)                                                               |
| 206954_at   | 2.54  | up   | 301.88 | 115.89 | WIT1    | Wilms tumor upstream neighbor 1                                                       |
| 206956_at   | 7.37  | up   | 235.71 | 31.16  | BGLAP   | bone gamma-carboxyglutamate (gla) protein                                             |
| 206967_at   | 2.45  | up   | 527.00 | 209.42 | CCNT1   | cyclin T1                                                                             |
| 207005_s_at | 4.07  | up   | 117.09 | 28.02  | BCL2    | B-cell CLL                                                                            |
| 207196_s_at | 2.93  | down | 159.75 | 456.35 | TNIP1   | TNFAIP3 interacting protein 1                                                         |
| 207206_s_at | 15.14 | up   | 174.54 | 11.24  | ALOX12  | arachidonate 12-lipoxygenase                                                          |
| 207222_at   | 5.10  | up   | 198.45 | 37.92  | PLA2G10 | phospholipase A2, group X                                                             |
| 207334_s_at | 8.70  | up   | 172.60 | 19.34  | TGFBR2  | transforming growth factor, beta receptor II (70)                                     |
| 207347_at   | 2.11  | up   | 255.20 | 118.18 | ERCC6   | excision repair cross-complementing rodent repair deficiency, complementation group 6 |
| 207348_s_at | 6.82  | up   | 518.07 | 74.06  | LIG3    | ligase III, DNA, ATP-dependent                                                        |
| 207353_s_at | 2.29  | up   | 531.72 | 226.61 | HMX1    | H6 family homeobox 1                                                                  |
| 207407_x_at | 3.37  | up   | 124.69 | 36.04  | CYP4A11 | cytochrome P450, family 4, subfamily A, polypeptide 11                                |
| 207425_s_at | 4.04  | down | 75.28  | 296.63 | 9.00    | septin 9                                                                              |

|             |       |      |        |        |            |                                                     |
|-------------|-------|------|--------|--------|------------|-----------------------------------------------------|
| 207449_s_at | 26.94 | up   | 163.28 | 5.91   | POFUT2     | protein O-fucosyltransferase 2                      |
| 207466_at   | 2.22  | down | 84.11  | 182.21 | GAL        | galanin prepropeptide                               |
| 207470_at   | 26.68 | down | 7.35   | 191.06 | CFZp566H08 | hypothetical LOC54744                               |
| 207471_at   | 62.70 | up   | 196.33 | 3.05   |            |                                                     |
| 207537_at   | 6.91  | up   | 153.14 | 21.62  | PFKFB1     | 6-phosphofructo-2-kinase                            |
| 207558_s_at | 2.18  | down | 100.20 | 212.67 | PITX2      | paired-like homeodomain 2                           |
| 207561_s_at | 3.14  | down | 57.27  | 175.58 | ACCN3      | amiloride-sensitive cation channel 3                |
| 207711_at   | 4.39  | down | 53.85  | 230.47 | C20orf117  | chromosome 20 open reading frame 117                |
| 207735_at   | 30.05 | down | 6.42   | 188.16 | RNF125     | ring finger protein 125                             |
| 207780_at   | 2.93  | down | 52.27  | 149.41 | CYLC2      | cylicin, basic protein of sperm head cytoskeleton 2 |
| 207781_s_at | 2.04  | up   | 206.14 | 98.70  | ZNF711     | zinc finger protein 711                             |
| 207808_s_at | 4.21  | down | 55.88  | 229.55 | PROS1      | protein S (alpha)                                   |
| 207811_at   | 37.60 | up   | 113.44 | 2.94   | KRT12      | keratin 12                                          |
| 207866_at   | 6.91  | down | 17.50  | 117.93 | BMP8A      | bone morphogenetic protein 8a                       |
| 207871_s_at | 2.16  | up   | 445.89 | 201.52 | ST7        | suppression of tumorigenicity 7                     |
| 207943_x_at | 3.09  | down | 197.12 | 593.59 | PLAGL1     | pleiomorphic adenoma gene-like 1                    |
| 207960_at   | 10.94 | down | 15.40  | 164.28 |            |                                                     |
| 207963_at   | 4.13  | down | 44.17  | 178.01 | C6orf54    | chromosome 6 open reading frame 54                  |
| 207968_s_at | 12.84 | up   | 202.67 | 15.39  | MEF2C      | myocyte enhancer factor 2C                          |
| 207976_at   | 2.00  | up   | 152.79 | 74.41  | KLHL18     | kelch-like 18 (Drosophila)                          |
| 207977_s_at | 4.52  | down | 28.50  | 125.48 | DPT        | dermatopontin                                       |
| 207981_s_at | 18.98 | up   | 337.18 | 17.32  | ESRRG      | estrogen-related receptor gamma                     |
| 207996_s_at | 39.60 | up   | 74.51  | 1.83   | C18orf1    | chromosome 18 open reading frame 1                  |
| 208039_at   | 2.74  | down | 81.62  | 217.86 |            |                                                     |

|             |       |      |         |         |         |                                                                                |
|-------------|-------|------|---------|---------|---------|--------------------------------------------------------------------------------|
| 208047_s_at | 2.48  | down | 161.11  | 389.60  | NAB1    | NGFI-A binding protein 1 (EGR1 binding protein 1)                              |
| 208078_s_at | 2.19  | up   | 628.58  | 279.42  | SIK1    | salt-inducible kinase 1                                                        |
| 208086_s_at | 3.13  | down | 230.70  | 704.24  | DMD     | dystrophin                                                                     |
| 208144_s_at | 3.62  | up   | 110.17  | 29.65   |         |                                                                                |
| 208170_s_at | 23.15 | up   | 127.20  | 5.36    | TRIM31  | tripartite motif-containing 31                                                 |
| 208188_at   | 2.02  | down | 163.56  | 322.30  | KRT9    | keratin 9                                                                      |
| 208199_s_at | 2.32  | down | 139.21  | 314.23  | ZFP161  | zinc finger protein 161 homolog (mouse)                                        |
| 208218_s_at | 3.96  | up   | 135.56  | 33.41   | ACVR1B  | activin A receptor, type IB                                                    |
| 208240_s_at | 3.60  | down | 53.39   | 187.27  | FGF1    | fibroblast growth factor 1 (acidic)                                            |
| 208241_at   | 2.45  | down | 314.82  | 751.47  | NRG1    | neuregulin 1                                                                   |
| 208253_at   | 4.61  | down | 31.18   | 140.17  | SIGLEC8 | sialic acid binding Ig-like lectin 8                                           |
| 208274_at   | 3.58  | up   | 404.00  | 109.95  | OCLM    | oculomedin                                                                     |
| 208297_s_at | 2.02  | down | 159.01  | 312.95  | EVI5    | ecotropic viral integration site 5                                             |
| 208403_x_at | 16.12 | up   | 147.67  | 8.93    | MAX     | MYC associated factor X                                                        |
| 208459_s_at | 2.19  | up   | 921.62  | 411.04  | XPO7    | exportin 7                                                                     |
| 208493_at   | 2.31  | down | 112.58  | 253.87  | HOXA11  | homeobox A11                                                                   |
| 208540_x_at | 2.58  | down | 996.17  | 2508.36 | S100A11 | S100 calcium binding protein A11                                               |
| 208557_at   | 2.28  | up   | 311.79  | 133.48  | HOXA6   | homeobox A6                                                                    |
| 208591_s_at | 4.48  | up   | 478.26  | 104.08  | PDE3B   | phosphodiesterase 3B, cGMP-inhibited                                           |
| 208594_x_at | 16.37 | up   | 299.74  | 17.85   | LILRA6  | leukocyte immunoglobulin-like receptor, subfamily A (with TM domain), member 6 |
| 208597_at   | 18.86 | up   | 159.58  | 8.25    | CNTF    | ciliary neurotrophic factor                                                    |
| 208648_at   | 2.18  | up   | 2189.85 | 977.90  | VCP     | valosin-containing protein                                                     |
| 208650_s_at | 8.50  | up   | 860.60  | 98.74   | CD24    | CD24 molecule                                                                  |
| 208651_x_at | 8.02  | up   | 1003.16 | 121.99  | CD24    | CD24 molecule                                                                  |



|             |       |      |         |         |        |                                                                                         |
|-------------|-------|------|---------|---------|--------|-----------------------------------------------------------------------------------------|
| 208751_at   | 3.25  | up   | 124.34  | 37.30   | NAPA   | N-ethylmaleimide-sensitive factor attachment protein, alpha                             |
| 208759_at   | 2.13  | up   | 1292.26 | 590.41  | NCSTN  | nicastrin                                                                               |
| 208792_s_at | 3.38  | down | 94.77   | 311.95  | CLU    | clusterin                                                                               |
| 208886_at   | 2.79  | down | 1319.23 | 3586.97 | H1F0   | H1 histone family, member 0                                                             |
| 208891_at   | 2.09  | down | 3329.80 | 6792.08 | DUSP6  | dual specificity phosphatase 6                                                          |
| 208892_s_at | 2.09  | down | 2801.57 | 5714.59 | DUSP6  | dual specificity phosphatase 6                                                          |
| 208953_at   | 2.02  | down | 488.89  | 961.33  | LARP5  | La ribonucleoprotein domain family, member 5                                            |
| 209023_s_at | 2.38  | down | 374.68  | 869.56  | STAG2  | stromal antigen 2                                                                       |
| 209083_at   | 4.12  | down | 144.47  | 579.82  | CORO1A | coronin, actin binding protein, 1A                                                      |
| 209099_x_at | 3.60  | down | 70.72   | 248.40  | JAG1   | jagged 1 (Alagille syndrome)                                                            |
| 209101_at   | 3.92  | up   | 867.00  | 215.87  | CTGF   | connective tissue growth factor                                                         |
| 209117_at   | 2.13  | down | 335.88  | 697.56  | WBP2   | WW domain binding protein 2                                                             |
| 209160_at   | 9.06  | up   | 1510.96 | 162.67  | AKR1C3 | aldo-keto reductase family 1, member C3 (3-alpha hydroxysteroid dehydrogenase, type II) |
| 209169_at   | 6.53  | down | 16.49   | 105.01  | GPM6B  | glycoprotein M6B                                                                        |
| 209173_at   | 12.22 | up   | 5716.96 | 456.05  | AGR2   | anterior gradient homolog 2 (Xenopus laevis)                                            |
| 209184_s_at | 7.96  | up   | 809.86  | 99.18   | IRS2   | insulin receptor substrate 2                                                            |
| 209185_s_at | 6.34  | up   | 845.20  | 130.02  | IRS2   | insulin receptor substrate 2                                                            |
| 209189_at   | 7.64  | down | 32.93   | 245.25  | FOS    | v-fos FBJ murine osteosarcoma viral oncogene homolog                                    |
| 209198_s_at | 2.10  | down | 164.30  | 336.00  | SYT11  | synaptotagmin XI                                                                        |

|             |       |      |        |         |           |                                                                                                                                      |
|-------------|-------|------|--------|---------|-----------|--------------------------------------------------------------------------------------------------------------------------------------|
| 209211_at   | 4.69  | down | 30.95  | 141.55  | KLF5      | Kruppel-like factor 5 (intestinal)                                                                                                   |
| 209293_x_at | 2.64  | down | 580.69 | 1496.92 | ID4       | inhibitor of DNA binding 4, dominant negative helix-loop-helix protein                                                               |
| 209322_s_at | 8.25  | down | 19.74  | 158.72  | SH2B1     | SH2B adaptor protein 1                                                                                                               |
| 209356_x_at | 3.78  | down | 64.93  | 239.53  | EFEMP2    | EGF-containing fibulin-like extracellular matrix protein 2                                                                           |
| 209357_at   | 3.23  | down | 512.07 | 1614.12 | CITED2    | Cbp                                                                                                                                  |
| 209380_s_at | 2.04  | up   | 877.57 | 419.37  | ABCC5     | ATP-binding cassette, sub-family C (CFTR                                                                                             |
| 209403_at   | 3.49  | down | 49.06  | 167.01  | LOC653498 | similar to TBC1 domain family member 3 (Rab GTPase-activating protein PRC17) (Prostate cancer gene 17 protein) (TRE17 alpha protein) |
| 209405_s_at | 2.07  | up   | 330.67 | 155.82  | FAM3A     | family with sequence similarity 3, member A                                                                                          |
| 209414_at   | 17.43 | up   | 294.58 | 16.48   | FZR1      | fizzy                                                                                                                                |
| 209459_s_at | 49.71 | up   | 91.15  | 1.79    | ABAT      | 4-aminobutyrate aminotransferase                                                                                                     |
| 209496_at   | 5.62  | down | 416.51 | 2280.60 | RARRES2   | retinoic acid receptor responder (tazarotene induced) 2                                                                              |
| 209519_at   | 3.75  | up   | 199.54 | 51.90   | NCBP1     | nuclear cap binding protein subunit 1, 80kDa                                                                                         |
| 209529_at   | 2.64  | up   | 464.54 | 171.74  | PPAP2C    | phosphatidic acid phosphatase type 2C                                                                                                |
| 209534_x_at | 5.40  | up   | 232.50 | 41.98   | AKAP13    | A kinase (PRKA) anchor protein 13                                                                                                    |
| 209551_at   | 6.09  | up   | 196.97 | 31.54   | YIPF4     | Yip1 domain family, member 4                                                                                                         |
| 209561_at   | 6.35  | down | 74.06  | 458.68  | THBS3     | thrombospondin 3                                                                                                                     |

|             |      |      |         |         |          |                                                                                         |
|-------------|------|------|---------|---------|----------|-----------------------------------------------------------------------------------------|
| 209568_s_at | 2.08 | up   | 423.23  | 198.69  | RGL1     | ral guanine nucleotide dissociation stimulator-like 1                                   |
| 209576_at   | 3.23 | down | 513.55  | 1619.22 | GNAI1    | guanine nucleotide binding protein (G protein), alpha inhibiting activity polypeptide 1 |
| 209604_s_at | 2.87 | up   | 363.85  | 123.48  | GATA3    | GATA binding protein 3                                                                  |
| 209613_s_at | 3.72 | up   | 35.92   | 9.41    | ADH1B    | alcohol dehydrogenase 1B (class I), beta polypeptide                                    |
| 209619_at   | 5.04 | down | 30.89   | 151.64  | CD74     | CD74 molecule, major histocompatibility complex, class II invariant chain               |
| 209640_at   | 2.80 | down | 53.33   | 145.60  | PML      | promyelocytic leukemia                                                                  |
| 209645_s_at | 2.00 | up   | 731.33  | 356.04  | ALDH1B1  | aldehyde dehydrogenase 1 family, member B1                                              |
| 209651_at   | 3.37 | down | 125.73  | 413.09  | TGFB1I1  | transforming growth factor beta 1 induced transcript 1                                  |
| 209717_at   | 2.11 | down | 682.23  | 1400.79 | EVI5     | ecotropic viral integration site 5                                                      |
| 209723_at   | 2.26 | down | 1974.62 | 4342.95 | SERPINB9 | serpin peptidase inhibitor, clade B (ovalbumin), member 9                               |
| 209724_s_at | 2.07 | down | 347.43  | 700.21  | ZFP161   | zinc finger protein 161 homolog (mouse)                                                 |
| 209735_at   | 2.09 | down | 88.56   | 180.36  | ABCG2    | ATP-binding cassette, sub-family G (WHITE), member 2                                    |
| 209737_at   | 2.54 | down | 111.34  | 275.71  | MAGI2    | membrane associated guanylate kinase, WW and PDZ domain containing 2                    |

|             |       |      |         |         |           |                                                                                        |
|-------------|-------|------|---------|---------|-----------|----------------------------------------------------------------------------------------|
| 209752_at   | 12.43 | down | 12.37   | 149.84  | REG1A     | regenerating islet-derived 1 alpha                                                     |
| 209754_s_at | 2.20  | up   | 1383.22 | 613.76  | TMPO      | thymopoietin                                                                           |
| 209771_x_at | 17.25 | up   | 3294.13 | 186.21  | CD24      | CD24 molecule                                                                          |
| 209772_s_at | 7.68  | up   | 535.18  | 67.91   | CD24      | CD24 molecule                                                                          |
| 209840_s_at | 8.76  | up   | 2015.29 | 224.24  | LRRN3     | leucine rich repeat neuronal 3                                                         |
| 209841_s_at | 14.00 | up   | 2868.44 | 199.82  | LRRN3     | leucine rich repeat neuronal 3                                                         |
| 209865_at   | 4.23  | down | 116.88  | 482.61  | SLC35A3   | solute carrier family 35 (UDP-N-acetylglucosamine (UDP-GlcNAc) transporter), member A3 |
| 209882_at   | 2.15  | down | 470.70  | 985.20  | RIT1      | Ras-like without CAAX 1                                                                |
| 209893_s_at | 2.02  | down | 158.14  | 311.53  | FUT4      | fucosyltransferase 4 (alpha (1,3) fucosyltransferase, myeloid-specific)                |
| 209904_at   | 2.25  | down | 1079.31 | 2367.94 | TNNC1     | troponin C type 1 (slow)                                                               |
| 209922_at   | 2.15  | up   | 333.68  | 151.13  | BRAP      | BRCA1 associated protein                                                               |
| 209926_at   | 2.17  | down | 137.62  | 291.59  | LOC729991 | hypothetical protein LOC729991                                                         |
| 209966_x_at | 20.80 | up   | 251.83  | 11.81   | ESRRG     | estrogen-related receptor gamma                                                        |
| 210004_at   | 5.76  | down | 20.00   | 112.23  | OLR1      | oxidized low density lipoprotein (lectin-like) receptor 1                              |
| 210062_s_at | 2.87  | up   | 524.72  | 178.03  | ZNF589    | zinc finger protein 589                                                                |
| 210136_at   | 3.13  | down | 140.44  | 428.56  | MBP       | myelin basic protein                                                                   |
| 210170_at   | 25.09 | up   | 111.82  | 4.34    | PDLIM3    | PDZ and LIM domain 3                                                                   |
| 210205_at   | 2.22  | down | 124.95  | 270.28  | B3GALT4   | UDP-Gal:betaGlcNAc beta 1,3-galactosyltransferase, polypeptide 4                       |
| 210271_at   | 3.23  | up   | 266.98  | 80.58   | NEUROD2   | neurogenic differentiation 2                                                           |

|             |       |      |         |        |              |                                                           |
|-------------|-------|------|---------|--------|--------------|-----------------------------------------------------------|
| 210301_at   | 2.08  | up   | 305.39  | 143.24 | XDH          | xanthine dehydrogenase                                    |
| 210347_s_at | 29.01 | up   | 230.64  | 7.75   | BCL11A       | B-cell CLL                                                |
| 210392_x_at | 3.26  | down | 80.49   | 256.12 | NR6A1        | nuclear receptor subfamily 6, group A, member 1           |
| 210410_s_at | 2.95  | down | 105.40  | 303.43 | C6orf26      | chromosome 6 open reading frame 26                        |
| 210424_s_at | 2.08  | up   | 538.80  | 252.33 | GOLGA8A      | golgi autoantigen, golgin subfamily a, 8A                 |
| 210436_at   | 2.39  | down | 109.41  | 255.19 | CCT8         | chaperonin containing TCP1, subunit 8 (theta)             |
| 210527_x_at | 2.65  | up   | 946.01  | 347.55 | TUBA3C       | tubulin, alpha 3c                                         |
| 210538_s_at | 2.60  | down | 58.97   | 149.69 | BIRC3        | baculoviral IAP repeat-containing 3                       |
| 210598_at   | 4.78  | up   | 389.03  | 79.43  |              |                                                           |
| 210630_s_at | 2.18  | up   | 247.95  | 110.96 | RAD52        | RAD52 homolog (S. cerevisiae)                             |
| 210651_s_at | 2.09  | down | 290.92  | 592.07 | EPHB2        | EPH receptor B2                                           |
| 210672_s_at | 2.56  | up   | 1868.47 | 711.66 | C16orf35     | chromosome 16 open reading frame 35                       |
| 210688_s_at | 2.36  | up   | 458.64  | 189.48 | CPT1A        | carnitine palmitoyltransferase 1A (liver)                 |
| 210713_at   | 11.22 | up   | 163.66  | 14.23  | ITSN1        | intersectin 1 (SH3 domain protein)                        |
| 210732_s_at | 16.82 | down | 8.60    | 140.93 | LGALS8       | lectin, galactoside-binding, soluble, 8                   |
| 210735_s_at | 2.52  | down | 113.76  | 279.25 | CA12         | carbonic anhydrase XII                                    |
| 210748_at   | 2.23  | up   | 169.64  | 74.14  | LOC100129624 | hypothetical LOC100129624                                 |
| 210786_s_at | 22.13 | up   | 185.40  | 8.17   | FLI1         | Friend leukemia virus integration 1                       |
| 210789_x_at | 4.13  | down | 93.29   | 375.92 | CEACAM3      | carcinoembryonic antigen-related cell adhesion molecule 3 |
| 210882_s_at | 43.37 | up   | 125.08  | 2.81   | TRO          | trophinin                                                 |
| 210886_x_at | 2.01  | up   | 449.73  | 218.34 | TP53TG1      | TP53 target 1 (non-protein coding)                        |
| 210920_x_at | 2.84  | down | 65.08   | 179.93 |              |                                                           |

|             |       |      |         |        |           |                                                                            |
|-------------|-------|------|---------|--------|-----------|----------------------------------------------------------------------------|
| 210954_s_at | 2.18  | down | 129.76  | 275.18 | TSC22D2   | TSC22 domain family, member 2                                              |
| 211026_s_at | 2.72  | up   | 185.38  | 66.37  | MGLL      | monoglyceride lipase                                                       |
| 211027_s_at | 7.96  | down | 16.24   | 125.97 | IKBKB     | inhibitor of kappa light polypeptide gene enhancer in B-cells, kinase beta |
| 211050_x_at | 4.08  | up   | 840.07  | 200.62 | FZP434B20 | similar to hypothetical protein LOC284701                                  |
| 211106_at   | 2.91  | down | 65.93   | 186.73 |           |                                                                            |
| 211138_s_at | 14.24 | up   | 174.88  | 11.97  | KMO       | kynurenine 3-monooxygenase (kynurenine 3-hydroxylase)                      |
| 211143_x_at | 6.58  | up   | 325.15  | 48.20  | NR4A1     | nuclear receptor subfamily 4, group A, member 1                            |
| 211250_s_at | 2.50  | up   | 227.13  | 88.59  | SH3BP2    | SH3-domain binding protein 2                                               |
| 211252_x_at | 2.03  | up   | 391.30  | 188.06 | PTCRA     | pre T-cell antigen receptor alpha                                          |
| 211284_s_at | 2.32  | down | 261.98  | 591.68 | GRN       | granulin                                                                   |
| 211299_s_at | 8.69  | up   | 225.21  | 25.27  | FLOT2     | flotillin 2                                                                |
| 211417_x_at | 2.45  | down | 232.02  | 553.72 | GGT1      | gamma-glutamyltransferase 1                                                |
| 211434_s_at | 4.03  | down | 71.40   | 280.55 | CCRL2     | chemokine (C-C motif) receptor-like 2                                      |
| 211460_at   | 6.58  | up   | 106.34  | 15.75  | TTY9A     | testis-specific transcript, Y-linked 9A                                    |
| 211471_s_at | 3.73  | up   | 465.73  | 121.61 | RAB36     | RAB36, member RAS oncogene family                                          |
| 211521_s_at | 2.86  | up   | 343.17  | 116.91 | CYTH4     | cytohesin 4                                                                |
| 211527_x_at | 17.62 | down | 12.88   | 221.28 | VEGFA     | vascular endothelial growth factor A                                       |
| 211576_s_at | 3.41  | up   | 1007.71 | 288.48 | SLC19A1   | solute carrier family 19 (folate transporter), member 1                    |
| 211580_s_at | 2.34  | up   | 256.60  | 107.05 | PIK3R3    | phosphoinositide-3-kinase, regulatory subunit 3 (gamma)                    |

|             |        |      |         |         |           |                                                                                                                                                  |
|-------------|--------|------|---------|---------|-----------|--------------------------------------------------------------------------------------------------------------------------------------------------|
| 211590_x_at | 2.24   | down | 135.35  | 295.26  | TBXA2R    | thromboxane A2 receptor                                                                                                                          |
| 211653_x_at | 3.37   | up   | 499.84  | 144.72  | AKR1C2    | aldo-keto reductase family 1, member C2 (dihydrodiol dehydrogenase 2; bile acid binding protein; 3-alpha hydroxysteroid dehydrogenase, type III) |
| 211692_s_at | 5.74   | down | 47.57   | 266.36  | BBC3      | BCL2 binding component 3                                                                                                                         |
| 211721_s_at | 3.88   | up   | 391.06  | 98.18   | ZNF551    | zinc finger protein 551                                                                                                                          |
| 211756_at   | 25.22  | down | 6.62    | 162.68  | PTH1H     | parathyroid hormone-like hormone                                                                                                                 |
| 211819_s_at | 2.41   | up   | 163.74  | 66.14   | SORBS1    | sorbin and SH3 domain containing 1                                                                                                               |
| 211870_s_at | 2.30   | down | 48.45   | 108.79  | PCDHA3    | protocadherin alpha 3                                                                                                                            |
| 211902_x_at | 8.18   | down | 14.65   | 116.85  | TRA@      | T cell receptor alpha locus                                                                                                                      |
| 211959_at   | 143.38 | up   | 697.01  | 4.74    | IGFBP5    | insulin-like growth factor binding protein 5                                                                                                     |
| 211975_at   | 2.00   | up   | 918.25  | 446.86  | ARFGAP2   | ADP-ribosylation factor GTPase activating protein 2                                                                                              |
| 211980_at   | 3.44   | up   | 1333.43 | 377.47  | COL4A1    | collagen, type IV, alpha 1                                                                                                                       |
| 212046_x_at | 6.72   | down | 61.17   | 400.49  | MAPK3     | mitogen-activated protein kinase 3                                                                                                               |
| 212052_s_at | 2.46   | up   | 2782.37 | 1104.56 | TBC1D9B   | TBC1 domain family, member 9B (with GRAM domain)                                                                                                 |
| 212097_at   | 3.89   | up   | 318.35  | 79.71   | CAV1      | caveolin 1, caveolae protein, 22kDa                                                                                                              |
| 212102_s_at | 2.14   | down | 214.29  | 446.07  | KPNA6     | karyopherin alpha 6 (importin alpha 7)                                                                                                           |
| 212115_at   | 2.42   | up   | 6852.33 | 2757.77 | HN1L      | hematological and neurological expressed 1-like                                                                                                  |
| 212162_at   | 2.01   | up   | 614.33  | 298.40  | KIDINS220 | kinase D-interacting substrate, 220kDa                                                                                                           |

|             |       |      |         |         |          |                                                                            |
|-------------|-------|------|---------|---------|----------|----------------------------------------------------------------------------|
| 212203_x_at | 13.88 | down | 252.38  | 3415.49 | IFITM3   | interferon induced transmembrane protein 3 (1-8U)                          |
| 212220_at   | 2.62  | down | 237.25  | 607.17  | PSME4    | proteasome (prosome, macropain) activator subunit 4                        |
| 212254_s_at | 2.45  | down | 596.00  | 1425.02 | DST      | dystonin                                                                   |
| 212268_at   | 2.60  | down | 534.83  | 1353.76 | SERPINB1 | serpin peptidase inhibitor, clade B (ovalbumin), member 1                  |
| 212275_s_at | 3.99  | up   | 379.97  | 92.93   | SRCAP    | Snf2-related CREBBP activator protein                                      |
| 212286_at   | 2.50  | down | 203.11  | 495.91  | ANKRD12  | ankyrin repeat domain 12                                                   |
| 212289_at   | 2.37  | down | 199.06  | 459.42  | ANKRD12  | ankyrin repeat domain 12                                                   |
| 212297_at   | 2.01  | up   | 1967.71 | 953.65  | ATP13A3  | ATPase type 13A3                                                           |
| 212325_at   | 2.58  | down | 86.32   | 216.97  | LIMCH1   | LIM and calponin homology domains 1                                        |
| 212327_at   | 3.48  | down | 40.27   | 136.70  | LIMCH1   | LIM and calponin homology domains 1                                        |
| 212336_at   | 3.61  | down | 42.52   | 149.74  | EPB41L1  | erythrocyte membrane protein band 4.1-like 1                               |
| 212362_at   | 2.23  | up   | 266.67  | 116.45  | ATP2A2   | ATPase, Ca <sup>++</sup> transporting, cardiac muscle, slow twitch 2       |
| 212382_at   | 2.89  | up   | 355.25  | 120.00  | TCF4     | transcription factor 4                                                     |
| 212384_at   | 2.20  | down | 121.02  | 259.48  | BAT1     | HLA-B associated transcript 1                                              |
| 212386_at   | 6.79  | up   | 1161.61 | 166.75  | TCF4     | transcription factor 4                                                     |
| 212387_at   | 4.89  | up   | 569.38  | 113.47  | TCF4     | transcription factor 4                                                     |
| 212443_at   | 2.56  | down | 119.94  | 299.77  | NBEAL2   | neurobeachin-like 2                                                        |
| 212473_s_at | 6.60  | up   | 287.91  | 42.54   | MICAL2   | microtubule associated monooxygenase, calponin and LIM domain containing 2 |



|             |       |      |         |         |         |                                                                                       |
|-------------|-------|------|---------|---------|---------|---------------------------------------------------------------------------------------|
| 212482_at   | 2.64  | down | 563.93  | 1451.19 | RMND5A  | required for meiotic nuclear division 5 homolog A ( <i>S. cerevisiae</i> )            |
| 212543_at   | 17.33 | up   | 120.01  | 6.75    | AIM1    | absent in melanoma 1                                                                  |
| 212550_at   | 2.64  | down | 88.55   | 227.50  | STAT5B  | signal transducer and activator of transcription 5B                                   |
| 212560_at   | 2.37  | down | 487.84  | 1129.25 | SORL1   | sortilin-related receptor, L(DLR class) A repeats-containing                          |
| 212567_s_at | 2.27  | up   | 560.38  | 240.41  | MAP4    | microtubule-associated protein 4                                                      |
| 212588_at   | 2.34  | up   | 112.83  | 47.11   | PTPRC   | protein tyrosine phosphatase, receptor type, C                                        |
| 212599_at   | 2.56  | up   | 318.47  | 121.43  | AUTS2   | autism susceptibility candidate 2                                                     |
| 212612_at   | 2.76  | down | 816.87  | 2195.60 | RCOR1   | REST corepressor 1                                                                    |
| 212622_at   | 2.03  | down | 2268.29 | 4479.20 | TMEM41B | transmembrane protein 41B                                                             |
| 212660_at   | 2.27  | down | 130.61  | 289.29  | PHF15   | PHD finger protein 15                                                                 |
| 212667_at   | 2.69  | up   | 93.26   | 33.85   | SPARC   | secreted protein, acidic, cysteine-rich (osteonectin)                                 |
| 212703_at   | 2.13  | up   | 541.57  | 247.93  | TLN2    | talin 2                                                                               |
| 212724_at   | 3.75  | down | 287.32  | 1051.40 | RND3    | Rho family GTPase 3                                                                   |
| 212774_at   | 2.28  | down | 139.71  | 310.24  | ZNF238  | zinc finger protein 238                                                               |
| 212819_at   | 3.54  | down | 45.03   | 155.39  | ASB1    | ankyrin repeat and SOCS box-containing 1                                              |
| 212823_s_at | 3.10  | up   | 512.71  | 161.42  | PLEKHG3 | pleckstrin homology domain containing, family G (with RhoGef domain) member 3         |
| 212839_s_at | 2.40  | up   | 314.02  | 127.70  | TROVE2  | TROVE domain family, member 2                                                         |
| 212840_at   | 2.02  | down | 464.52  | 916.24  | UBXN7   | UBX domain protein 7                                                                  |
| 212851_at   | 2.02  | up   | 1205.06 | 580.35  | DCUN1D4 | DCN1, defective in cullin neddylation 1, domain containing 4 ( <i>S. cerevisiae</i> ) |

|             |       |      |         |         |           |                                                          |
|-------------|-------|------|---------|---------|-----------|----------------------------------------------------------|
| 212940_at   | 2.01  | up   | 638.33  | 310.14  | COL6A1    | collagen, type VI, alpha 1                               |
| 212963_at   | 30.41 | down | 8.01    | 237.43  | TM2D1     | TM2 domain containing 1                                  |
| 212966_at   | 2.39  | up   | 1320.11 | 537.80  | HIC2      | hypermethylated in cancer 2                              |
| 212980_at   | 3.64  | down | 73.87   | 262.11  | USP34     | ubiquitin specific peptidase 34                          |
| 213002_at   | 2.56  | up   | 467.82  | 177.92  | MARCKS    | myristoylated alanine-rich protein kinase C substrate    |
| 213058_at   | 2.06  | up   | 389.16  | 184.47  | TTC28     | tetratricopeptide repeat domain 28                       |
| 213074_at   | 2.07  | down | 1467.80 | 2965.46 | PHIP      | pleckstrin homology domain interacting protein           |
| 213094_at   | 3.51  | down | 815.55  | 2788.52 | GPR126    | G protein-coupled receptor 126                           |
| 213112_s_at | 27.71 | up   | 211.14  | 7.43    | SQSTM1    | sequestosome 1                                           |
| 213120_at   | 2.02  | up   | 261.54  | 126.29  | UHRF1BP1L | UHRF1 binding protein 1-like                             |
| 213146_at   | 3.70  | up   | 361.46  | 95.19   | KDM6B     | lysine (K)-specific demethylase 6B                       |
| 213159_at   | 2.44  | up   | 412.88  | 164.95  | PCNX      | pecanex homolog (Drosophila)                             |
| 213178_s_at | 2.18  | down | 206.04  | 438.25  | MAPK8IP3  | mitogen-activated protein kinase 8 interacting protein 3 |
| 213202_at   | 2.42  | up   | 277.02  | 111.83  | SETD1A    | SET domain containing 1A                                 |
| 213221_s_at | 2.29  | up   | 530.40  | 225.67  | SIK2      | salt-inducible kinase 2                                  |
| 213229_at   | 2.07  | up   | 1109.35 | 521.91  | DICER1    | dicer 1, ribonuclease type III                           |
| 213241_at   | 6.39  | up   | 166.47  | 25.39   | PLXNC1    | plexin C1                                                |
| 213254_at   | 7.85  | up   | 546.06  | 67.82   | TNRC6B    | trinucleotide repeat containing 6B                       |
| 213257_at   | 2.26  | up   | 251.89  | 108.74  | SARM1     | sterile alpha and TIR motif containing 1                 |
| 213281_at   | 2.34  | up   | 224.89  | 93.55   | JUN       | Jun oncogene                                             |
| 213285_at   | 3.47  | down | 2436.34 | 8250.77 | TMEM30B   | transmembrane protein 30B                                |

|             |       |      |         |         |          |                                                                                       |
|-------------|-------|------|---------|---------|----------|---------------------------------------------------------------------------------------|
| 213286_at   | 2.66  | down | 224.00  | 580.69  | ZFR      | zinc finger RNA binding protein                                                       |
| 213298_at   | 2.16  | up   | 563.49  | 254.62  | NFIC     | nuclear factor I                                                                      |
| 213319_s_at | 17.50 | up   | 299.90  | 16.71   | CSDA     | Cold shock domain protein A                                                           |
| 213338_at   | 2.55  | up   | 1332.64 | 509.27  | TMEM158  | transmembrane protein 158                                                             |
| 213342_at   | 2.16  | down | 611.08  | 1287.34 | YAP1     | Yes-associated protein 1, 65kDa                                                       |
| 213349_at   | 2.36  | up   | 558.25  | 230.45  | TMCC1    | transmembrane and coiled-coil domain family 1                                         |
| 213353_at   | 2.55  | down | 346.68  | 860.74  | ABCA5    | ATP-binding cassette, sub-family A (ABC1), member 5                                   |
| 213420_at   | 2.68  | up   | 463.40  | 168.49  | DHX57    | DEAH (Asp-Glu-Ala-Asp                                                                 |
| 213449_at   | 2.05  | up   | 462.40  | 220.31  | POP1     | processing of precursor 1, ribonuclease P                                             |
| 213468_at   | 2.04  | up   | 344.51  | 164.48  | ERCC2    | excision repair cross-complementing rodent repair deficiency, complementation group 2 |
| 213469_at   | 4.80  | up   | 262.34  | 53.27   | PGAP1    | post-GPI attachment to proteins 1                                                     |
| 213479_at   | 6.24  | up   | 853.83  | 133.33  | NPTX2    | neuronal pentraxin II                                                                 |
| 213489_at   | 4.02  | down | 61.14   | 239.46  | MAPRE2   | Microtubule-associated protein, RP                                                    |
| 213498_at   | 21.78 | up   | 232.39  | 10.40   | CREB3L1  | cAMP responsive element binding protein 3-like 1                                      |
| 213525_at   | 13.60 | up   | 110.74  | 7.94    |          |                                                                                       |
| 213527_s_at | 3.19  | down | 154.48  | 480.09  | ZNF688   | zinc finger protein 688                                                               |
| 213572_s_at | 2.21  | down | 332.40  | 717.58  | SERPINB1 | serpin peptidase inhibitor, clade B (ovalbumin), member 1                             |
| 213573_at   | 2.97  | down | 565.34  | 1636.55 |          |                                                                                       |
| 213631_x_at | 4.27  | up   | 157.78  | 35.99   | DHODH    | dihydroorotate dehydrogenase                                                          |

|             |       |      |         |        |          |                                                                        |
|-------------|-------|------|---------|--------|----------|------------------------------------------------------------------------|
| 213635_s_at | 2.12  | down | 82.49   | 170.56 | SAFB     | Scaffold attachment factor B                                           |
| 213644_at   | 3.27  | down | 118.26  | 376.80 | CCDC46   | coiled-coil domain containing 46                                       |
| 213650_at   | 2.20  | down | 381.19  | 819.46 | GOLGA8A  | golgi autoantigen, golgin subfamily a, 8A                              |
| 213668_s_at | 6.44  | up   | 1024.52 | 155.12 | SOX4     | SRY (sex determining region Y)-box 4                                   |
| 213676_at   | 7.20  | up   | 122.89  | 16.64  | TMEM151B | transmembrane protein 151B                                             |
| 213681_at   | 3.27  | down | 93.55   | 298.56 | CYHR1    | cysteine                                                               |
| 213718_at   | 3.87  | up   | 493.43  | 124.31 | RBM4     | RNA binding motif protein 4                                            |
| 213744_at   | 3.34  | down | 34.81   | 113.51 | ATRNL1   | attractin-like 1                                                       |
| 213810_s_at | 3.00  | up   | 156.34  | 50.77  | AKIRIN2  | Akirin 2                                                               |
| 213813_x_at | 2.09  | up   | 1048.83 | 489.02 |          |                                                                        |
| 213880_at   | 41.03 | up   | 285.71  | 6.79   | LGR5     | leucine-rich repeat-containing G protein-coupled receptor 5            |
| 213891_s_at | 4.34  | up   | 745.96  | 167.55 | TCF4     | transcription factor 4                                                 |
| 213904_at   | 21.29 | up   | 191.28  | 8.76   |          |                                                                        |
| 213919_at   | 3.74  | up   | 184.55  | 48.13  | DNAJC4   | DnaJ (Hsp40) homolog, subfamily C, member 4                            |
| 213931_at   | 4.95  | down | 93.80   | 452.55 | ID2      | inhibitor of DNA binding 2, dominant negative helix-loop-helix protein |
| 213936_x_at | 3.97  | up   | 441.80  | 108.48 | SFTPB    | surfactant protein B                                                   |
| 213954_at   | 2.75  | down | 129.70  | 347.45 | FAM169A  | family with sequence similarity 169, member A                          |
| 213976_at   | 18.45 | down | 7.52    | 135.25 | CIZ1     | CDKN1A interacting zinc finger protein 1                               |
| 213998_s_at | 2.55  | up   | 556.13  | 212.42 | DDX17    | DEAD (Asp-Glu-Ala-Asp) box polypeptide 17                              |
| 214017_s_at | 2.16  | up   | 895.85  | 404.33 | DHX34    | DEAH (Asp-Glu-Ala-His) box polypeptide 34                              |
| 214048_at   | 2.95  | up   | 163.03  | 53.88  | MBD4     | methyl-CpG binding domain protein 4                                    |

|             |       |      |         |         |        |                                                                                                       |
|-------------|-------|------|---------|---------|--------|-------------------------------------------------------------------------------------------------------|
| 214056_at   | 3.10  | down | 108.39  | 327.61  | MCL1   | Myeloid cell leukemia sequence 1 (BCL2-related)                                                       |
| 214071_at   | 3.14  | up   | 425.76  | 132.38  | GNAL   | guanine nucleotide binding protein (G protein), alpha activating activity polypeptide, olfactory type |
| 214091_s_at | 2.91  | up   | 109.97  | 36.87   | GPX3   | glutathione peroxidase 3 (plasma)                                                                     |
| 214105_at   | 2.51  | up   | 248.80  | 96.57   | SOCS3  | suppressor of cytokine signaling 3                                                                    |
| 214106_s_at | 2.64  | up   | 1061.03 | 391.58  | GMDS   | GDP-mannose 4,6-dehydratase                                                                           |
| 214159_at   | 3.71  | up   | 144.02  | 37.87   | PLCE1  | Phospholipase C, epsilon 1                                                                            |
| 214241_at   | 2.03  | up   | 318.77  | 153.23  | NDUFB8 | NADH dehydrogenase (ubiquinone) 1 beta subcomplex, 8, 19kDa                                           |
| 214283_at   | 2.21  | up   | 716.15  | 316.49  | TMEM97 | transmembrane protein 97                                                                              |
| 214297_at   | 2.86  | down | 199.85  | 557.84  | CSPG4  | chondroitin sulfate proteoglycan 4                                                                    |
| 214299_at   | 2.19  | up   | 438.14  | 195.35  | TOP3A  | topoisomerase (DNA) III alpha                                                                         |
| 214332_s_at | 8.49  | up   | 251.67  | 28.89   | TSFM   | Ts translation elongation factor, mitochondrial                                                       |
| 214335_at   | 3.95  | down | 48.15   | 185.34  | RPL18  | ribosomal protein L18                                                                                 |
| 214379_at   | 2.25  | up   | 205.33  | 89.08   | HNRPDL | Heterogeneous nuclear ribonucleoprotein D-like                                                        |
| 214417_s_at | 3.41  | up   | 148.72  | 42.58   | FETUB  | Fetuin B                                                                                              |
| 214430_at   | 2.31  | down | 1911.69 | 4310.23 | GLA    | galactosidase, alpha                                                                                  |
| 214467_at   | 8.19  | up   | 415.73  | 49.47   | GPR65  | G protein-coupled receptor 65                                                                         |
| 214515_at   | 8.03  | up   | 124.80  | 15.16   | OR1E1  | olfactory receptor, family 1, subfamily E, member 1                                                   |
| 214519_s_at | 30.64 | down | 3.17    | 94.69   | RLN2   | relaxin 2                                                                                             |

|             |       |      |        |         |           |                                                                                                            |
|-------------|-------|------|--------|---------|-----------|------------------------------------------------------------------------------------------------------------|
| 214581_x_at | 3.02  | up   | 527.72 | 170.39  | TNFRSF21  | tumor necrosis factor receptor superfamily, member 21                                                      |
| 214604_at   | 16.80 | up   | 264.65 | 15.35   | HOXD11    | homeobox D11                                                                                               |
| 214649_s_at | 2.43  | down | 867.82 | 2056.29 | MTMR2     | myotubularin related protein 2                                                                             |
| 214650_x_at | 3.03  | up   | 172.68 | 55.64   | MOG       | myelin oligodendrocyte glycoprotein                                                                        |
| 214690_at   | 3.06  | down | 84.26  | 251.79  | TAF1B     | TATA box binding protein (TBP)-associated factor, RNA polymerase I, B, 63kDa                               |
| 214694_at   | 2.21  | up   | 233.06 | 102.62  | LOC729143 | similar to Myosin phosphatase Rho-interacting protein (Rho-interacting protein 3) (M-RIP) (RIP3) (p116Rip) |
| 214698_at   | 2.24  | up   | 656.79 | 286.31  | ROD1      | ROD1 regulator of differentiation 1 (S. pombe)                                                             |
| 214699_x_at | 2.21  | up   | 187.67 | 82.90   | WIPI2     | WD repeat domain, phosphoinositide interacting 2                                                           |
| 214712_at   | 9.63  | down | 11.73  | 110.15  | LOC730092 | RRN3 RNA polymerase I transcription factor homolog (S. cerevisiae) pseudogene                              |
| 214716_at   | 2.14  | down | 62.72  | 130.57  | BMP2K     | BMP2 inducible kinase                                                                                      |
| 214724_at   | 2.11  | down | 171.19 | 351.43  | DIXDC1    | DIX domain containing 1                                                                                    |
| 214745_at   | 3.14  | down | 152.47 | 466.16  | PLCH1     | phospholipase C, eta 1                                                                                     |
| 214749_s_at | 7.23  | down | 650.11 | 4585.54 | ARMCX6    | armadillo repeat containing, X-linked 6                                                                    |
| 214759_at   | 3.63  | down | 78.12  | 276.10  | WTAP      | Wilms tumor 1 associated protein                                                                           |
| 214783_s_at | 4.35  | up   | 263.09 | 58.98   | ANXA11    | annexin A11                                                                                                |
| 214790_at   | 2.61  | up   | 429.11 | 160.01  | SENP6     | SUMO1                                                                                                      |

|             |       |      |         |         |           |                                                                          |
|-------------|-------|------|---------|---------|-----------|--------------------------------------------------------------------------|
| 214792_x_at | 6.83  | up   | 245.35  | 35.00   | VAMP2     | vesicle-associated membrane protein 2 (synaptobrevin 2)                  |
| 214915_at   | 2.20  | up   | 197.74  | 87.68   | ZNF362    | Zinc finger protein 362                                                  |
| 214932_at   | 2.72  | up   | 155.86  | 55.84   | KIDINS220 | kinase D-interacting substrate, 220kDa                                   |
| 214934_at   | 2.54  | up   | 442.28  | 170.03  | ATP9B     | ATPase, class II, type 9B                                                |
| 214948_s_at | 3.07  | down | 1403.15 | 4203.95 | TMF1      | TATA element modulatory factor 1                                         |
| 214949_at   | 2.25  | down | 1174.79 | 2582.10 | TMPRSS6   | transmembrane protease, serine 6                                         |
| 214955_at   | 2.67  | up   | 309.62  | 113.27  |           |                                                                          |
| 214967_at   | 11.95 | down | 17.36   | 202.30  | PRDX2     | peroxiredoxin 2                                                          |
| 214989_x_at | 2.54  | down | 543.59  | 1344.77 |           |                                                                          |
| 215006_at   | 3.09  | up   | 672.50  | 212.07  |           |                                                                          |
| 215067_x_at | 4.54  | up   | 590.09  | 126.68  |           |                                                                          |
| 215071_s_at | 2.01  | down | 223.98  | 438.52  |           |                                                                          |
| 215078_at   | 3.87  | down | 37.07   | 139.99  | SOD2      | superoxide dismutase 2, mitochondrial                                    |
| 215082_at   | 2.52  | down | 191.59  | 470.69  | ELOVL5    | ELOVL family member 5, elongation of long chain fatty acids (FEN1)       |
| 215087_at   | 2.39  | up   | 179.20  | 72.95   | C15orf39  | chromosome 15 open reading frame 39                                      |
| 215122_at   | 47.85 | down | 3.62    | 168.80  | TBX6      | T-box 6                                                                  |
| 215170_s_at | 4.49  | down | 150.47  | 659.08  | CEP152    | centrosomal protein 152kDa                                               |
| 215178_x_at | 2.43  | up   | 381.19  | 152.73  | NAAA      | N-acylethanolamine acid amidase                                          |
| 215190_at   | 2.02  | up   | 445.90  | 214.87  | EIF3M     | eukaryotic translation initiation factor 3, subunit M                    |
| 215241_at   | 8.71  | down | 16.01   | 135.96  | ANO3      | anoctamin 3                                                              |
| 215260_s_at | 3.30  | down | 91.61   | 294.58  | TCF3      | transcription factor 3 (E2A immunoglobulin enhancer binding factors E12) |

|             |       |      |        |        |           |                                                         |
|-------------|-------|------|--------|--------|-----------|---------------------------------------------------------|
| 215285_s_at | 2.01  | down | 386.36 | 757.56 | PHTF1     | putative homeodomain transcription factor 1             |
| 215307_at   | 2.05  | down | 260.13 | 520.95 | ZNF529    | zinc finger protein 529                                 |
| 215314_at   | 2.78  | up   | 150.85 | 52.81  |           |                                                         |
| 215336_at   | 2.54  | up   | 207.48 | 79.69  | AKAP11    | A kinase (PRKA) anchor protein 11                       |
| 215376_at   | 7.97  | down | 19.27  | 149.77 |           |                                                         |
| 215407_s_at | 3.26  | down | 103.37 | 328.53 | ASTN2     | astrotactin 2                                           |
| 215468_at   | 6.39  | down | 18.80  | 117.17 | LOC647070 | hypothetical LOC647070                                  |
| 215476_at   | 3.41  | down | 80.08  | 266.57 |           |                                                         |
| 215490_at   | 7.60  | up   | 176.74 | 22.68  | C1orf69   | chromosome 1 open reading frame 69                      |
| 215510_at   | 2.88  | up   | 126.22 | 42.74  | ETV2      | ets variant 2                                           |
| 215512_at   | 3.15  | up   | 130.89 | 40.56  | 3.00      | membrane-associated ring finger (C3HC4) 6               |
| 215529_x_at | 2.77  | down | 271.69 | 732.58 | DIP2A     | DIP2 disco-interacting protein 2 homolog A (Drosophila) |
| 215556_at   | 7.13  | up   | 160.16 | 21.91  |           |                                                         |
| 215557_at   | 3.33  | down | 64.43  | 208.93 |           |                                                         |
| 215599_at   | 2.46  | down | 144.40 | 345.95 | LOC653188 | glucuronidase, beta pseudogene                          |
| 215618_at   | 4.91  | up   | 215.81 | 42.84  | RSU1      | Ras suppressor protein 1                                |
| 215645_at   | 12.19 | up   | 284.37 | 22.74  | FLCN      | folliculin                                              |
| 215650_at   | 9.71  | down | 17.06  | 161.44 |           |                                                         |
| 215655_at   | 6.42  | down | 12.94  | 80.99  | GRIK2     | Glutamate receptor, ionotropic, kainate 2               |
| 215664_s_at | 2.21  | up   | 247.60 | 109.35 | EPHA5     | EPH receptor A5                                         |
| 215737_x_at | 2.28  | down | 239.41 | 531.89 | USF2      | upstream transcription factor 2, c-fos interacting      |
| 215744_at   | 9.60  | up   | 249.42 | 25.33  | FUS       | fusion (involved in t(12;16) in malignant liposarcoma)  |
| 215749_s_at | 2.25  | up   | 572.39 | 247.66 | GORASP1   | golgi reassembly stacking protein 1, 65kDa              |
| 215750_at   | 2.57  | down | 56.92  | 142.49 | KIAA1659  | KIAA1659 protein                                        |



|             |       |      |         |        |           |                                                       |
|-------------|-------|------|---------|--------|-----------|-------------------------------------------------------|
| 215766_at   | 2.07  | down | 141.06  | 284.04 | GSTA1     | Glutathione S-transferase alpha 1                     |
| 215778_x_at | 4.23  | down | 74.20   | 306.19 | HAB1      | B1 for mucin                                          |
| 215786_at   | 8.57  | down | 13.02   | 108.81 |           |                                                       |
| 215866_at   | 4.71  | down | 46.56   | 213.94 |           |                                                       |
| 215875_at   | 2.01  | down | 81.28   | 159.34 |           |                                                       |
| 215917_at   | 3.49  | up   | 128.72  | 35.91  | SNPH      | syntaphilin                                           |
| 215987_at   | 20.44 | up   | 231.80  | 11.06  | RAPGEF2   | Rap guanine nucleotide exchange factor (GEF) 2        |
| 215999_at   | 3.80  | up   | 192.42  | 49.39  | CDRT1     | CMT1A duplicated region transcript 1                  |
| 216060_s_at | 2.60  | up   | 477.76  | 179.45 | DAAM1     | dishevelled associated activator of morphogenesis 1   |
| 216064_s_at | 3.15  | up   | 283.52  | 87.83  | AGA       | aspartylglucosaminidase                               |
| 216081_at   | 2.16  | up   | 217.90  | 98.24  | LAMA4     | laminin, alpha 4                                      |
| 216124_at   | 2.37  | up   | 108.34  | 44.60  |           |                                                       |
| 216217_at   | 2.28  | down | 100.34  | 222.81 | PLCL2     | phospholipase C-like 2                                |
| 216240_at   | 2.13  | up   | 207.77  | 95.16  | PVT1      | Pvt1 oncogene (non-protein coding)                    |
| 216256_at   | 2.86  | down | 98.65   | 275.04 | GRM8      | glutamate receptor, metabotropic 8                    |
| 216323_x_at | 2.03  | up   | 933.32  | 447.35 | TUBA3D    | tubulin, alpha 3d                                     |
| 216361_s_at | 5.11  | up   | 189.53  | 36.13  | MYST3     | MYST histone acetyltransferase (monocytic leukemia) 3 |
| 216363_at   | 6.48  | up   | 232.66  | 34.99  |           |                                                       |
| 216374_at   | 10.75 | down | 14.08   | 147.55 | LOC728395 | similar to testis specific protein, Y-linked 1        |
| 216379_x_at | 23.87 | up   | 3057.09 | 124.86 | CD24      | CD24 molecule                                         |
| 216388_s_at | 15.97 | up   | 314.26  | 19.18  | LTB4R     | leukotriene B4 receptor                               |
| 216399_s_at | 2.21  | down | 174.63  | 376.91 | SCAPER    | S-phase cyclin A-associated protein in the ER         |
| 216422_at   | 21.67 | down | 15.95   | 336.95 | PA2G4     | proliferation-associated 2G4, 38kDa                   |

|             |       |      |          |          |            |                                                                                                                              |
|-------------|-------|------|----------|----------|------------|------------------------------------------------------------------------------------------------------------------------------|
| 216438_s_at | 4.40  | up   | 48123.62 | 10662.39 | TMSB4X     | thymosin beta 4, X-linked                                                                                                    |
| 216441_at   | 2.69  | up   | 77.89    | 28.18    |            |                                                                                                                              |
| 216443_at   | 3.27  | up   | 144.47   | 43.06    |            |                                                                                                                              |
| 216540_at   | 8.14  | up   | 114.04   | 13.66    | TRD@       | T cell receptor delta locus                                                                                                  |
| 216565_x_at | 14.68 | down | 41.98    | 600.99   |            |                                                                                                                              |
| 216574_s_at | 2.62  | up   | 430.41   | 160.37   | CG_202441  | rcRPE                                                                                                                        |
| 216583_x_at | 5.34  | down | 148.41   | 772.81   | NHP2       | NHP2 ribonucleoprotein homolog (yeast)                                                                                       |
| 216594_x_at | 10.59 | up   | 488.21   | 44.93    | AKR1C1     | aldo-keto reductase family 1, member C1 (dihydrodiol dehydrogenase 1; 20-alpha (3-alpha)-hydroxysteroid dehydrogenase)       |
| 216669_at   | 35.35 | down | 2.90     | 99.91    |            |                                                                                                                              |
| 216673_at   | 15.76 | up   | 151.02   | 9.34     | XC10010111 | testis-specific transcript, Y-linked 1-like                                                                                  |
| 216678_at   | 2.71  | up   | 552.96   | 198.65   | IFT122     | intraflagellar transport 122 homolog (Chlamydomonas)                                                                         |
| 216682_s_at | 2.67  | down | 141.75   | 368.72   | FAM48A     | Family with sequence similarity 48, member A                                                                                 |
| 216716_at   | 12.86 | up   | 200.87   | 15.23    | ABO        | ABO blood group (transferase A, alpha 1-3-N-acetylgalactosaminyltransferase; transferase B, alpha 1-3-galactosyltransferase) |
| 216733_s_at | 2.14  | up   | 414.64   | 189.23   | GATM       | glycine amidinotransferase (L-arginine:glycine amidinotransferase)                                                           |
| 216740_at   | 10.78 | up   | 115.46   | 10.44    |            |                                                                                                                              |
| 216766_at   | 2.20  | up   | 164.68   | 73.02    |            |                                                                                                                              |
| 216770_at   | 4.02  | up   | 230.35   | 55.84    |            |                                                                                                                              |

|             |       |      |         |         |        |                                                                  |
|-------------|-------|------|---------|---------|--------|------------------------------------------------------------------|
| 216803_at   | 4.50  | up   | 206.28  | 44.71   | PDLIM5 | PDZ and LIM domain 5                                             |
| 216882_s_at | 2.09  | up   | 203.91  | 94.99   | NEBL   | nebulette                                                        |
| 216944_s_at | 2.58  | down | 116.72  | 293.70  | ITPR1  | inositol 1,4,5-triphosphate receptor, type 1                     |
| 216977_x_at | 2.14  | down | 3865.41 | 8075.98 | SNRPA1 | small nuclear ribonucleoprotein polypeptide A'                   |
| 216985_s_at | 4.41  | up   | 262.83  | 58.13   | STX3   | syntaxin 3                                                       |
| 216997_x_at | 2.51  | up   | 223.14  | 86.71   | TLE4   | transducin-like enhancer of split 4 (E(sp1) homolog, Drosophila) |
| 217008_s_at | 3.93  | up   | 137.76  | 34.17   | GRM7   | glutamate receptor, metabotropic 7                               |
| 217009_at   | 4.48  | up   | 203.54  | 44.26   | PGK2   | phosphoglycerate kinase 2                                        |
| 217014_s_at | 2.72  | up   | 222.35  | 79.77   | AZGP1  | alpha-2-glycoprotein 1, zinc-binding                             |
| 217097_s_at | 9.93  | down | 13.54   | 131.09  | PHTF2  | putative homeodomain transcription factor 2                      |
| 217191_x_at | 3.08  | up   | 426.01  | 134.69  |        |                                                                  |
| 217195_at   | 6.52  | down | 15.64   | 99.47   |        |                                                                  |
| 217207_s_at | 3.30  | up   | 201.41  | 59.57   | BTNL3  | butyrophilin-like 3                                              |
| 217216_x_at | 8.51  | down | 38.19   | 316.84  | MLH3   | mutL homolog 3 (E. coli)                                         |
| 217313_at   | 6.04  | up   | 434.36  | 70.16   |        |                                                                  |
| 217337_at   | 2.53  | down | 89.67   | 221.03  |        |                                                                  |
| 217363_x_at | 4.83  | up   | 1028.69 | 207.45  |        |                                                                  |
| 217364_x_at | 2.03  | up   | 504.67  | 242.55  | EIF3J  | eukaryotic translation initiation factor 3, subunit J            |
| 217367_s_at | 4.11  | down | 87.61   | 351.22  | ZHX3   | zinc fingers and homeoboxes 3                                    |
| 217371_s_at | 2.44  | up   | 105.17  | 41.95   | IL15   | interleukin 15                                                   |
| 217377_x_at | 17.59 | up   | 149.29  | 8.28    | NTRK3  | neurotrophic tyrosine kinase, receptor, type 3                   |
| 217382_at   | 30.15 | down | 3.75    | 110.26  |        |                                                                  |
| 217393_x_at | 3.78  | down | 450.33  | 1659.94 | UBE2NL | ubiquitin-conjugating enzyme E2N-like                            |

|             |       |      |         |         |           |                                                                       |
|-------------|-------|------|---------|---------|-----------|-----------------------------------------------------------------------|
| 217402_at   | 16.28 | up   | 117.26  | 7.02    |           |                                                                       |
| 217419_x_at | 2.10  | up   | 660.62  | 306.11  | AGRN      | agrin                                                                 |
| 217448_s_at | 2.78  | down | 91.25   | 246.95  | LOC285412 | similar to KIAA0737 protein                                           |
| 217457_s_at | 2.31  | down | 599.07  | 1346.31 | RAP1GDS1  | RAP1, GTP-GDP dissociation stimulator 1                               |
| 217482_at   | 2.28  | down | 171.88  | 381.88  |           |                                                                       |
| 217484_at   | 2.31  | up   | 193.70  | 81.77   | CR1       | complement component (3b                                              |
| 217489_s_at | 4.20  | up   | 192.63  | 44.77   | IL6R      | interleukin 6 receptor                                                |
| 217505_at   | 13.32 | up   | 92.07   | 6.74    | KLHL23    | kelch-like 23 (Drosophila)                                            |
| 217533_x_at | 2.37  | up   | 121.67  | 50.09   |           |                                                                       |
| 217539_at   | 4.54  | up   | 164.63  | 35.34   | C18orf25  | chromosome 18 open reading frame 25                                   |
| 217560_at   | 2.33  | up   | 269.32  | 112.60  | GGA1      | golgi associated, gamma adaptin ear containing, ARF binding protein 1 |
| 217566_s_at | 2.40  | up   | 211.50  | 86.10   | TGM4      | transglutaminase 4 (prostate)                                         |
| 217580_x_at | 2.27  | up   | 549.23  | 236.24  |           |                                                                       |
| 217583_at   | 31.87 | up   | 176.31  | 5.39    | PAH       | phenylalanine hydroxylase                                             |
| 217705_at   | 19.35 | up   | 102.43  | 5.16    | PRKD1     | protein kinase D1                                                     |
| 217707_x_at | 2.45  | up   | 137.75  | 54.77   | SMARCA2   | SWI                                                                   |
| 217714_x_at | 2.25  | down | 359.14  | 788.36  | STMN1     | stathmin 1                                                            |
| 217715_x_at | 2.68  | down | 202.46  | 528.68  |           |                                                                       |
| 217817_at   | 2.09  | up   | 1782.99 | 831.90  | ARPC4     | actin related protein 2                                               |
| 217856_at   | 2.64  | up   | 507.86  | 187.52  | RBM8A     | RNA binding motif protein 8A                                          |
| 217857_s_at | 3.06  | up   | 683.38  | 218.06  | RBM8A     | RNA binding motif protein 8A                                          |
| 217889_s_at | 2.01  | up   | 338.66  | 164.21  | CYBRD1    | cytochrome b reductase 1                                              |
| 217903_at   | 2.06  | down | 187.85  | 376.43  | STRN4     | striatin, calmodulin binding protein 4                                |
| 217912_at   | 2.15  | up   | 2061.47 | 934.43  | DUS1L     | dihydrouridine synthase 1-like (S. cerevisiae)                        |

|             |        |      |         |         |           |                                                               |
|-------------|--------|------|---------|---------|-----------|---------------------------------------------------------------|
| 217975_at   | 2.22   | down | 1080.59 | 2336.10 | WBP5      | WW domain binding protein 5                                   |
| 217979_at   | 2.07   | up   | 4072.98 | 1914.41 | TSPAN13   | tetraspanin 13                                                |
| 217996_at   | 2.31   | up   | 485.64  | 204.94  | PHLDA1    | pleckstrin homology-like domain, family A, member 1           |
| 218176_at   | 2.95   | up   | 1322.42 | 436.75  | MAGEF1    | melanoma antigen family F, 1                                  |
| 218179_s_at | 2.20   | down | 141.12  | 302.99  | C4orf41   | chromosome 4 open reading frame 41                            |
| 218223_s_at | 2.81   | down | 95.57   | 262.14  | PLEKHO1   | pleckstrin homology domain containing, family O member 1      |
| 218225_at   | 3.01   | up   | 1849.30 | 598.50  | ECSIT     | ECSIT homolog (Drosophila)                                    |
| 218292_s_at | 2.06   | down | 314.99  | 632.41  | PRKAG2    | protein kinase, AMP-activated, gamma 2 non-catalytic subunit  |
| 218303_x_at | 2.17   | down | 990.51  | 2100.36 | KRCC1     | lysine-rich coiled-coil 1                                     |
| 218346_s_at | 2.79   | up   | 297.58  | 103.83  | SESN1     | sestrin 1                                                     |
| 218415_at   | 2.08   | down | 274.14  | 556.27  | VPS33B    | vacuolar protein sorting 33 homolog B (yeast)                 |
| 218430_s_at | 2.57   | up   | 384.95  | 146.11  | RFX7      | regulatory factor X, 7                                        |
| 218522_s_at | 3.09   | up   | 462.25  | 146.09  | MAP1S     | microtubule-associated protein 1S                             |
| 218551_at   | 2.21   | up   | 263.83  | 116.41  | MIIP      | migration and invasion inhibitory protein                     |
| 218613_at   | 2.01   | up   | 853.19  | 413.92  | PSD3      | pleckstrin and Sec7 domain containing 3                       |
| 218678_at   | 2.74   | down | 381.33  | 1019.96 | NES       | nestin                                                        |
| 218692_at   | 2.38   | down | 47.07   | 109.26  | GOLSYN    | Golgi-localized protein                                       |
| 218705_s_at | 2.02   | up   | 761.08  | 366.83  | SNX24     | sorting nexin 24                                              |
| 218720_x_at | 2.00   | down | 191.84  | 374.48  | LOC652900 | similar to seizure related 6 homolog (mouse)-like 2 isoform 1 |
| 218736_s_at | 180.54 | up   | 1352.71 | 7.31    | PALMD     | palmdelphin                                                   |
| 218739_at   | 2.30   | down | 336.53  | 753.31  | ABHD5     | abhydrolase domain containing 5                               |

|             |      |      |         |         |           |                                                                                |
|-------------|------|------|---------|---------|-----------|--------------------------------------------------------------------------------|
| 218745_x_at | 2.35 | up   | 1233.45 | 512.35  | TMEM161A  | transmembrane protein 161A                                                     |
| 218764_at   | 2.76 | down | 284.35  | 766.42  | PRKCH     | protein kinase C, eta                                                          |
| 218820_at   | 2.36 | up   | 210.46  | 86.90   | C14orf132 | chromosome 14 open reading frame 132                                           |
| 218869_at   | 2.04 | down | 221.61  | 439.80  | MLYCD     | malonyl-CoA decarboxylase                                                      |
| 218899_s_at | 3.13 | down | 41.58   | 126.80  | BAALC     | brain and acute leukemia, cytoplasmic                                          |
| 218900_at   | 2.37 | down | 147.18  | 340.77  | CNNM4     | cyclin M4                                                                      |
| 218929_at   | 2.25 | up   | 1400.84 | 607.73  | CDKN2AIP  | CDKN2A interacting protein                                                     |
| 218954_s_at | 2.14 | down | 216.23  | 451.93  | BRF2      | BRF2, subunit of RNA polymerase III transcription initiation factor, BRF1-like |
| 218967_s_at | 2.65 | down | 247.82  | 641.40  | PTER      | phosphotriesterase related                                                     |
| 218981_at   | 2.14 | down | 541.77  | 1129.30 | ACN9      | ACN9 homolog (S. cerevisiae)                                                   |
| 218983_at   | 7.39 | down | 16.64   | 119.83  | C1RL      | complement component 1, r subcomponent-like                                    |
| 219072_at   | 3.13 | up   | 3492.98 | 1088.20 | BCL7C     | B-cell CLL                                                                     |
| 219073_s_at | 2.30 | up   | 1013.39 | 430.29  | OSBPL10   | oxysterol binding protein-like 10                                              |
| 219078_at   | 2.47 | up   | 735.75  | 290.90  | GPATCH2   | G patch domain containing 2                                                    |
| 219084_at   | 2.92 | up   | 200.52  | 67.06   | NSD1      | nuclear receptor binding SET domain protein 1                                  |
| 219089_s_at | 7.19 | up   | 599.67  | 81.28   | ZNF576    | zinc finger protein 576                                                        |
| 219104_at   | 2.09 | up   | 409.18  | 190.96  | RNF141    | ring finger protein 141                                                        |
| 219118_at   | 4.72 | up   | 268.67  | 55.55   | FKBP11    | FK506 binding protein 11, 19 kDa                                               |
| 219142_at   | 9.89 | down | 16.92   | 163.21  | RASL11B   | RAS-like, family 11, member B                                                  |
| 219179_at   | 6.23 | up   | 424.50  | 66.45   | DACT1     | dapper, antagonist of beta-catenin, homolog 1 (Xenopus laevis)                 |
| 219189_at   | 2.50 | up   | 231.73  | 90.49   | FBXL6     | F-box and leucine-rich repeat protein 6                                        |

|             |       |      |         |         |            |                                                                                   |
|-------------|-------|------|---------|---------|------------|-----------------------------------------------------------------------------------|
| 219237_s_at | 2.18  | down | 579.95  | 1232.87 | DNAJB14    | DnaJ (Hsp40) homolog, subfamily B, member 14                                      |
| 219264_s_at | 3.26  | up   | 320.88  | 96.06   | DC10013408 | similar to protein phosphatase 2 (formerly 2A), regulatory subunit B, beta        |
| 219281_at   | 2.07  | up   | 686.46  | 322.60  | MSRA       | methionine sulfoxide reductase A                                                  |
| 219287_at   | 2.13  | down | 334.98  | 696.54  | KCNMB4     | potassium large conductance calcium-activated channel, subfamily M, beta member 4 |
| 219295_s_at | 2.38  | up   | 957.52  | 392.60  | PCOLCE2    | procollagen C-endopeptidase enhancer 2                                            |
| 219325_s_at | 18.82 | down | 7.86    | 144.23  | ELAC1      | elaC homolog 1 (E. coli)                                                          |
| 219328_at   | 3.07  | up   | 772.39  | 245.22  | DDX31      | DEAD (Asp-Glu-Ala-Asp) box polypeptide 31                                         |
| 219351_at   | 2.36  | down | 247.32  | 568.15  | TRAPPC2    | trafficking protein particle complex 2                                            |
| 219361_s_at | 2.03  | up   | 1333.51 | 639.75  | AEN        | apoptosis enhancing nuclease                                                      |
| 219388_at   | 28.74 | down | 6.61    | 185.30  | GRHL2      | grainyhead-like 2 (Drosophila)                                                    |
| 219398_at   | 5.65  | up   | 300.26  | 51.83   | CIDEC      | cell death-inducing DFFA-like effector c                                          |
| 219399_at   | 3.42  | down | 437.50  | 1460.74 | LIN7C      | lin-7 homolog C (C. elegans)                                                      |
| 219405_at   | 3.79  | down | 87.27   | 322.21  | TRIM68     | tripartite motif-containing 68                                                    |
| 219472_at   | 2.30  | up   | 377.10  | 159.81  | CENPO      | centromere protein O                                                              |
| 219484_at   | 2.50  | down | 95.40   | 232.89  | HCFC2      | host cell factor C2                                                               |
| 219497_s_at | 5.61  | up   | 173.83  | 30.19   | BCL11A     | B-cell CLL                                                                        |
| 219508_at   | 5.98  | down | 29.86   | 174.22  | GCNT3      | glucosaminyl (N-acetyl) transferase 3, mucin type                                 |
| 219523_s_at | 12.66 | down | 19.64   | 242.45  | ODZ3       | odz, odd Oz                                                                       |

|             |       |      |         |        |          |                                                                       |
|-------------|-------|------|---------|--------|----------|-----------------------------------------------------------------------|
| 219532_at   | 2.21  | up   | 1133.74 | 500.17 | ELOVL4   | elongation of very long chain fatty acids (FEN1)                      |
| 219568_x_at | 36.33 | down | 5.71    | 202.17 | SOX18    | SRY (sex determining region Y)-box 18                                 |
| 219569_s_at | 4.39  | down | 158.44  | 678.82 | TMEM22   | transmembrane protein 22                                              |
| 219586_at   | 7.84  | down | 17.54   | 134.07 | WDR59    | WD repeat domain 59                                                   |
| 219608_s_at | 9.81  | up   | 115.31  | 11.46  | FBXO38   | F-box protein 38                                                      |
| 219637_at   | 2.16  | down | 390.31  | 821.16 | ARMC9    | armadillo repeat containing 9                                         |
| 219690_at   | 2.28  | down | 102.22  | 227.59 | TMEM149  | transmembrane protein 149                                             |
| 219694_at   | 3.01  | up   | 267.88  | 86.87  | FAM105A  | family with sequence similarity 105, member A                         |
| 219742_at   | 2.37  | down | 271.93  | 627.50 | PRR7     | proline rich 7 (synaptic)                                             |
| 219751_at   | 2.02  | down | 123.74  | 243.54 | SETD6    | SET domain containing 6                                               |
| 219759_at   | 2.05  | down | 164.90  | 329.03 | ERAP2    | endoplasmic reticulum aminopeptidase 2                                |
| 219778_at   | 11.32 | up   | 109.53  | 9.44   | ZFPM2    | zinc finger protein, multitype 2                                      |
| 219782_s_at | 15.00 | down | 14.33   | 209.63 | ZNF771   | zinc finger protein 771                                               |
| 219795_at   | 3.64  | up   | 91.23   | 24.42  | SLC6A14  | solute carrier family 6 (amino acid transporter), member 14           |
| 219805_at   | 2.95  | up   | 410.21  | 135.53 | CXorf56  | chromosome X open reading frame 56                                    |
| 219826_at   | 3.37  | up   | 503.24  | 145.46 | ZNF419   | zinc finger protein 419                                               |
| 219868_s_at | 2.13  | up   | 422.68  | 193.07 | ANKFY1   | ankyrin repeat and FYVE domain containing 1                           |
| 219881_s_at | 6.77  | up   | 222.24  | 31.98  |          |                                                                       |
| 219912_s_at | 3.40  | up   | 153.78  | 44.12  |          |                                                                       |
| 219915_s_at | 2.74  | down | 104.18  | 277.93 | SLC16A10 | solute carrier family 16, member 10 (aromatic amino acid transporter) |
| 219930_at   | 3.42  | up   | 167.88  | 47.85  | KLF8     | Kruppel-like factor 8                                                 |



|             |       |      |        |         |          |                                                                         |
|-------------|-------|------|--------|---------|----------|-------------------------------------------------------------------------|
| 219932_at   | 67.39 | up   | 404.60 | 5.85    | SLC27A6  | solute carrier family 27 (fatty acid transporter), member 6             |
| 219935_at   | 7.95  | down | 132.99 | 1030.83 | ADAMTS5  | ADAM metalloproteinase with thrombospondin type 1 motif, 5              |
| 219948_x_at | 20.25 | up   | 86.09  | 4.15    | UGT2A3   | UDP glucuronosyltransferase 2 family, polypeptide A3                    |
| 219952_s_at | 11.60 | up   | 378.81 | 31.83   | MCOLN1   | mucolipin 1                                                             |
| 219967_at   | 2.61  | down | 148.15 | 377.06  | MRM1     | mitochondrial rRNA methyltransferase 1 homolog ( <i>S. cerevisiae</i> ) |
| 219993_at   | 2.93  | up   | 126.94 | 42.20   | SOX17    | SRY (sex determining region Y)-box 17                                   |
| 220020_at   | 2.01  | up   | 298.99 | 144.67  | XPNPEP3  | X-prolyl aminopeptidase (aminopeptidase P) 3, putative                  |
| 220030_at   | 2.21  | up   | 204.04 | 89.94   | STYK1    | serine                                                                  |
| 220058_at   | 3.27  | down | 107.93 | 343.76  | C17orf39 | chromosome 17 open reading frame 39                                     |
| 220086_at   | 2.15  | up   | 523.72 | 237.72  | IKZF5    | IKAROS family zinc finger 5 (Pegasus)                                   |
| 220091_at   | 2.52  | down | 267.78 | 657.60  | SLC2A6   | solute carrier family 2 (facilitated glucose transporter), member 6     |
| 220112_at   | 15.36 | up   | 111.50 | 7.08    | ANKRD55  | ankyrin repeat domain 55                                                |
| 220158_at   | 2.37  | down | 46.52  | 107.59  | LGALS14  | lectin, galactoside-binding, soluble, 14                                |
| 220159_at   | 2.67  | up   | 385.93 | 140.81  | ABCA11P  | ATP-binding cassette, sub-family A (ABC1), member 11 (pseudogene)       |

|             |       |      |        |        |             |                                                       |
|-------------|-------|------|--------|--------|-------------|-------------------------------------------------------|
| 220162_s_at | 2.21  | up   | 319.29 | 140.73 | CARD9       | caspase recruitment domain family, member 9           |
| 220210_at   | 3.51  | down | 37.91  | 129.61 | CHRNA10     | cholinergic receptor, nicotinic, alpha 10             |
| 220219_s_at | 2.00  | down | 253.34 | 494.06 | LOC10013350 | similar to LRRC37A3 protein                           |
| 220236_at   | 2.25  | up   | 269.15 | 116.52 | PDPR        | pyruvate dehydrogenase phosphatase regulatory subunit |
| 220302_at   | 2.26  | down | 83.89  | 184.64 | MAK         | male germ cell-associated kinase                      |
| 220305_at   | 3.53  | down | 229.19 | 788.06 | MAVS        | mitochondrial antiviral signaling protein             |
| 220319_s_at | 8.10  | down | 25.37  | 200.22 | MYLIP       | myosin regulatory light chain interacting protein     |
| 220327_at   | 11.89 | down | 10.20  | 118.24 | VGLL3       | vestigial like 3 (Drosophila)                         |
| 220387_s_at | 2.04  | down | 105.60 | 210.45 | HHLA3       | HERV-H LTR-associating 3                              |
| 220391_at   | 2.54  | up   | 102.46 | 39.30  | ZBTB3       | zinc finger and BTB domain containing 3               |
| 220405_at   | 2.24  | down | 55.91  | 121.97 | LOC10012799 | hypothetical protein LOC100127998                     |
| 220459_at   | 2.19  | up   | 177.75 | 79.29  | MCM3APAS    | MCM3AP antisense RNA (non-protein coding)             |
| 220462_at   | 2.66  | down | 63.07  | 163.47 | CSRNP3      | cysteine-serine-rich nuclear protein 3                |
| 220500_s_at | 2.44  | down | 118.13 | 281.34 | RABL2A      | RAB, member of RAS oncogene family-like 2A            |
| 220518_at   | 5.43  | down | 21.76  | 115.14 | ABI3BP      | ABI family, member 3 (NESH) binding protein           |
| 220523_at   | 8.47  | up   | 91.52  | 10.53  | EFHC2       | EF-hand domain (C-terminal) containing 2              |
| 220562_at   | 24.15 | up   | 227.90 | 9.20   | CYP2W1      | cytochrome P450, family 2, subfamily W, polypeptide 1 |

|             |       |      |         |         |          |                                               |
|-------------|-------|------|---------|---------|----------|-----------------------------------------------|
| 220564_at   | 22.44 | up   | 138.65  | 6.02    | RNLS     | renalase, FAD-dependent amine oxidase         |
| 220565_at   | 2.10  | down | 430.58  | 882.22  | CCR10    | chemokine (C-C motif) receptor 10             |
| 220640_at   | 2.52  | up   | 195.58  | 75.69   | CSNK1G1  | casein kinase 1, gamma 1                      |
| 220669_at   | 2.05  | up   | 184.66  | 87.75   | OTUD4    | OTU domain containing 4                       |
| 220723_s_at | 8.75  | up   | 220.26  | 24.55   | FLJ21511 | hypothetical protein FLJ21511                 |
| 220786_s_at | 2.89  | up   | 167.73  | 56.64   | SLC38A4  | solute carrier family 38, member 4            |
| 220800_s_at | 2.01  | up   | 238.87  | 115.66  | TMOD3    | tropomodulin 3 (ubiquitous)                   |
| 220845_at   | 9.81  | up   | 105.04  | 10.43   | ACOXL    | acyl-Coenzyme A oxidase-like                  |
| 220855_at   | 3.85  | down | 52.53   | 197.40  |          |                                               |
| 220859_at   | 2.15  | up   | 153.82  | 69.85   |          |                                               |
| 220871_at   | 18.46 | up   | 242.73  | 12.82   |          |                                               |
| 220893_at   | 5.88  | down | 18.32   | 105.08  | LOC57399 | uncharacterized gastric protein ZA52P         |
| 220963_s_at | 6.22  | up   | 141.82  | 22.22   | C1orf89  | chromosome 1 open reading frame 89            |
| 220964_s_at | 2.19  | up   | 3075.10 | 1370.88 | RAB1B    | RAB1B, member RAS oncogene family             |
| 221027_s_at | 2.35  | down | 608.63  | 1393.32 | PLA2G12A | phospholipase A2, group XIIA                  |
| 221046_s_at | 2.49  | up   | 2425.38 | 949.08  | GTPBP8   | GTP-binding protein 8 (putative)              |
| 221078_s_at | 2.46  | down | 125.67  | 301.77  | CCDC88A  | coiled-coil domain containing 88A             |
| 221103_s_at | 8.65  | up   | 233.53  | 26.32   | WDR52    | WD repeat domain 52                           |
| 221168_at   | 13.71 | up   | 275.37  | 19.59   | PRDM13   | PR domain containing 13                       |
| 221170_at   | 7.25  | down | 15.24   | 107.71  | HRH4     | histamine receptor H4                         |
| 221176_x_at | 2.19  | up   | 403.63  | 179.78  | WBSCR23  | Williams-Beuren syndrome chromosome region 23 |
| 221197_s_at | 2.13  | up   | 262.49  | 120.32  | CHAT     | choline acetyltransferase                     |

|             |       |      |         |         |          |                                                                          |
|-------------|-------|------|---------|---------|----------|--------------------------------------------------------------------------|
| 221210_s_at | 2.59  | up   | 320.98  | 120.60  | NPL      | N-acetylneuraminase pyruvate lyase (dihydrodipicolinate synthase)        |
| 221234_s_at | 2.66  | up   | 334.16  | 122.33  | BACH2    | BTB and CNC homology 1, basic leucine zipper transcription factor 2      |
| 221318_at   | 7.11  | down | 28.31   | 196.22  | NEUROD4  | neurogenic differentiation 4                                             |
| 221350_at   | 2.35  | down | 208.86  | 479.01  | HOXC8    | homeobox C8                                                              |
| 221413_at   | 20.13 | down | 8.66    | 170.07  | KCNAB3   | potassium voltage-gated channel, shaker-related subfamily, beta member 3 |
| 221467_at   | 24.91 | up   | 150.28  | 5.88    | MC4R     | melanocortin 4 receptor                                                  |
| 221491_x_at | 34.84 | up   | 144.59  | 4.05    | HLA-DRB1 | major histocompatibility complex, class II, DR beta 1                    |
| 221496_s_at | 2.17  | up   | 748.72  | 336.45  | TOB2     | transducer of ERBB2, 2                                                   |
| 221549_at   | 2.16  | down | 244.27  | 514.61  | GRWD1    | glutamate-rich WD repeat containing 1                                    |
| 221553_at   | 2.62  | down | 430.56  | 1098.21 | MAGT1    | magnesium transporter 1                                                  |
| 221555_x_at | 2.19  | down | 261.63  | 559.75  | CDC14B   | CDC14 cell division cycle 14 homolog B ( <i>S. cerevisiae</i> )          |
| 221590_s_at | 2.18  | up   | 148.93  | 66.53   |          |                                                                          |
| 221681_s_at | 14.81 | up   | 150.83  | 9.93    | DSPP     | dentin sialophosphoprotein                                               |
| 221755_at   | 2.23  | down | 318.32  | 691.97  | EHBP1L1  | EH domain binding protein 1-like 1                                       |
| 221766_s_at | 2.89  | up   | 1324.06 | 446.25  | FAM46A   | family with sequence similarity 46, member A                             |
| 221837_at   | 6.29  | down | 32.88   | 201.48  | KLHL22   | kelch-like 22 ( <i>Drosophila</i> )                                      |
| 221849_s_at | 2.65  | up   | 243.62  | 89.73   | C19orf72 | chromosome 19 open reading frame 72                                      |

|             |       |      |        |        |          |                                                                  |
|-------------|-------|------|--------|--------|----------|------------------------------------------------------------------|
| 221857_s_at | 2.64  | up   | 420.73 | 155.13 | TJAP1    | tight junction associated protein 1 (peripheral)                 |
| 221874_at   | 9.03  | up   | 65.85  | 7.11   | KIAA1324 | KIAA1324                                                         |
| 221946_at   | 2.51  | up   | 584.82 | 227.60 | C9orf116 | chromosome 9 open reading frame 116                              |
| 221973_at   | 2.91  | up   | 338.30 | 113.48 |          |                                                                  |
| 221976_s_at | 2.02  | up   | 116.50 | 56.33  | HDGFRP3  | Hepatoma-derived growth factor, related protein 3                |
| 222016_s_at | 33.21 | up   | 169.96 | 4.99   | ZNF323   | zinc finger protein 323                                          |
| 222038_s_at | 7.93  | down | 12.12  | 93.68  | UTP18    | UTP18, small subunit (SSU) processome component, homolog (yeast) |
| 222074_at   | 2.85  | up   | 137.76 | 47.16  | UROD     | uroporphyrinogen decarboxylase                                   |
| 222105_s_at | 2.67  | up   | 706.90 | 258.52 | NKIRAS2  | NFKB inhibitor interacting Ras-like 2                            |
| 222118_at   | 2.11  | down | 321.54 | 661.50 | CENPN    | centromere protein N                                             |
| 222129_at   | 2.89  | up   | 402.22 | 135.54 | FAM134A  | family with sequence similarity 134, member A                    |
| 222156_x_at | 2.80  | up   | 105.01 | 36.60  | CCPG1    | cell cycle progression 1                                         |
| 222190_s_at | 2.59  | down | 200.99 | 506.69 | C16orf58 | chromosome 16 open reading frame 58                              |
| 222214_at   | 8.14  | down | 45.46  | 360.79 |          |                                                                  |
| 222219_s_at | 4.23  | up   | 164.23 | 37.84  | TLE6     | transducin-like enhancer of split 6 (E(sp1) homolog, Drosophila) |
| 222270_at   | 2.08  | up   | 181.33 | 84.92  | SMEK2    | SMEK homolog 2, suppressor of mek1 (Dictyostelium)               |
| 222274_at   | 2.31  | up   | 284.00 | 119.63 | ZDHHC8P  | zinc finger, DHHC-type containing 8 pseudogene                   |
| 222283_at   | 2.09  | down | 127.74 | 259.91 | ZNF480   | zinc finger protein 480                                          |

|             |      |      |         |         |          |                                                                                                                 |
|-------------|------|------|---------|---------|----------|-----------------------------------------------------------------------------------------------------------------|
| 222379_at   | 7.90 | up   | 102.82  | 12.69   | KCNE4    | potassium voltage-gated channel, Isk-related family, member 4                                                   |
| 266_s_at    | 4.41 | up   | 657.38  | 145.20  | CD24     | CD24 molecule                                                                                                   |
| 34187_at    | 7.50 | up   | 172.32  | 22.40   | RBMS2    | RNA binding motif, single stranded interacting protein 2                                                        |
| 34478_at    | 2.62 | up   | 198.66  | 73.80   | RAB11B   | RAB11B, member RAS oncogene family                                                                              |
| 36612_at    | 2.26 | up   | 371.30  | 160.05  | FAM168A  | family with sequence similarity 168, member A                                                                   |
| 37170_at    | 2.11 | down | 90.68   | 186.90  | BMP2K    | BMP2 inducible kinase                                                                                           |
| 37802_r_at  | 2.44 | up   | 220.90  | 88.24   | FAM63B   | family with sequence similarity 63, member B                                                                    |
| 39891_at    | 2.77 | up   | 415.60  | 146.48  | ZNF710   | zinc finger protein 710                                                                                         |
| 40016_g_at  | 4.42 | down | 41.12   | 177.14  | MAST4    | microtubule associated serine                                                                                   |
| 40560_at    | 5.05 | down | 398.73  | 1961.57 | TBX2     | T-box 2                                                                                                         |
| 50965_at    | 2.15 | down | 383.61  | 805.72  | RAB26    | RAB26, member RAS oncogene family                                                                               |
| 53720_at    | 2.69 | up   | 823.29  | 298.34  | C19orf66 | chromosome 19 open reading frame 66                                                                             |
| 57539_at    | 2.21 | down | 269.80  | 581.89  | ZGPAT    | zinc finger, CCCH-type with G patch domain                                                                      |
| 63305_at    | 8.98 | up   | 270.70  | 29.39   | PKNOX2   | PBX                                                                                                             |
| 222444_at   | 3.27 | down | 36.98   | 117.77  | ARMCX3   | armadillo repeat containing, X-linked 3                                                                         |
| 222456_s_at | 2.29 | up   | 250.33  | 106.58  | LIMA1    | LIM domain and actin binding 1                                                                                  |
| 222494_at   | 2.36 | up   | 1702.38 | 701.97  | FOXN3    | forkhead box N3                                                                                                 |
| 222556_at   | 2.16 | down | 103.51  | 218.22  | ALG5     | asparagine-linked glycosylation 5, dolichyl-phosphate beta-glucosyltransferase homolog ( <i>S. cerevisiae</i> ) |

|             |        |      |         |         |          |                                                                      |
|-------------|--------|------|---------|---------|----------|----------------------------------------------------------------------|
| 222561_at   | 2.18   | down | 180.12  | 382.03  | LANCL2   | LanC lantibiotic synthetase component C-like 2 (bacterial)           |
| 222567_s_at | 2.60   | up   | 766.63  | 287.76  | MEX3C    | mex-3 homolog C (C. elegans)                                         |
| 222641_s_at | 2.35   | down | 179.75  | 411.23  | C17orf63 | chromosome 17 open reading frame 63                                  |
| 222660_s_at | 2.49   | down | 108.69  | 264.24  | RNF38    | ring finger protein 38                                               |
| 222663_at   | 2.53   | up   | 732.29  | 281.92  | RIOK2    | RIO kinase 2 (yeast)                                                 |
| 222676_at   | 3.17   | up   | 401.84  | 123.64  | BRI3     | brain protein I3                                                     |
| 222689_at   | 2.60   | up   | 462.67  | 173.33  | ACER3    | alkaline ceramidase 3                                                |
| 222725_s_at | 102.81 | up   | 471.97  | 4.48    | PALMD    | palmdelphin                                                          |
| 222741_s_at | 2.70   | up   | 1029.18 | 371.57  | C6orf64  | chromosome 6 open reading frame 64                                   |
| 222795_s_at | 3.69   | down | 47.28   | 170.30  | PLCXD1   | phosphatidylinositol-specific phospholipase C, X domain containing 1 |
| 222796_at   | 2.34   | down | 168.12  | 383.99  | PTCD1    | pentatricopeptide repeat domain 1                                    |
| 222811_at   | 2.75   | down | 459.32  | 1232.71 | FTSJD1   | FtsJ methyltransferase domain containing 1                           |
| 222822_s_at | 2.86   | up   | 127.07  | 43.39   | MMRN2    | multimerin 2                                                         |
| 222835_at   | 5.31   | down | 33.03   | 170.85  | THSD4    | thrombospondin, type I, domain containing 4                          |
| 222863_at   | 6.14   | down | 30.24   | 181.11  | ZBTB10   | zinc finger and BTB domain containing 10                             |
| 222878_s_at | 2.69   | down | 64.74   | 169.91  | OTUB2    | OTU domain, ubiquitin aldehyde binding 2                             |
| 222886_at   | 36.14  | up   | 118.04  | 3.18    |          |                                                                      |
| 222888_at   | 3.42   | up   | 142.54  | 40.64   | CCNJ     | cyclin J                                                             |
| 222896_at   | 3.43   | down | 149.83  | 501.74  | TMEM38A  | transmembrane protein 38A                                            |
| 222899_at   | 2.84   | up   | 180.09  | 61.83   | ITGA11   | integrin, alpha 11                                                   |
| 223036_at   | 26.56  | down | 8.86    | 229.33  | FARSB    | phenylalanyl-tRNA synthetase, beta subunit                           |
| 223063_at   | 2.67   | up   | 2053.62 | 749.23  | C1orf198 | chromosome 1 open reading frame 198                                  |

|             |       |      |         |         |        |                                                                                         |
|-------------|-------|------|---------|---------|--------|-----------------------------------------------------------------------------------------|
| 223089_at   | 2.39  | down | 212.75  | 496.12  | VEZT   | vezatin, adherens junctions transmembrane protein                                       |
| 223099_s_at | 3.73  | down | 258.24  | 938.38  | LONP2  | lon peptidase 2, peroxisomal                                                            |
| 223132_s_at | 9.53  | down | 106.99  | 994.37  | TRIM8  | tripartite motif-containing 8                                                           |
| 223243_s_at | 2.04  | up   | 1860.81 | 890.71  | EDEM3  | ER degradation enhancer, mannosidase alpha-like 3                                       |
| 223253_at   | 2.70  | down | 493.35  | 1299.69 | EPDR1  | ependymin related protein 1 (zebrafish)                                                 |
| 223260_s_at | 3.70  | down | 229.02  | 826.57  | POLK   | polymerase (DNA directed) kappa                                                         |
| 223292_s_at | 2.30  | down | 87.36   | 195.54  | MRPS15 | mitochondrial ribosomal protein S15                                                     |
| 223302_s_at | 2.57  | down | 187.40  | 469.52  | ZNF655 | zinc finger protein 655                                                                 |
| 223322_at   | 2.01  | up   | 384.33  | 185.99  | RASSF5 | Ras association (RalGDS                                                                 |
| 223355_at   | 2.05  | down | 164.52  | 328.67  | ALG1   | asparagine-linked glycosylation 1, beta-1,4-mannosyltransferase homolog (S. cerevisiae) |
| 223372_at   | 16.62 | down | 5.98    | 96.91   | DNAJC4 | DnaJ (Hsp40) homolog, subfamily C, member 4                                             |
| 223432_at   | 7.62  | up   | 311.40  | 39.85   | OSBP2  | oxysterol binding protein 2                                                             |
| 223486_at   | 2.40  | up   | 2173.02 | 881.94  | GTPBP8 | GTP-binding protein 8 (putative)                                                        |
| 223487_x_at | 12.36 | up   | 102.00  | 8.04    | GNB4   | guanine nucleotide binding protein (G protein), beta polypeptide 4                      |
| 223506_at   | 2.24  | up   | 963.59  | 420.09  | ZC3H8  | zinc finger CCCH-type containing 8                                                      |



|             |      |      |        |        |         |                                                                                 |
|-------------|------|------|--------|--------|---------|---------------------------------------------------------------------------------|
| 223519_at   | 3.12 | down | 164.21 | 499.92 | ZAK     | sterile alpha motif and leucine zipper containing kinase AZK                    |
| 223522_at   | 2.86 | down | 102.59 | 285.58 | C9orf45 | chromosome 9 open reading frame 45                                              |
| 223533_at   | 2.06 | down | 297.39 | 596.45 | LRRC8C  | leucine rich repeat containing 8 family, member C                               |
| 223557_s_at | 2.72 | up   | 270.06 | 96.66  | TMEFF2  | transmembrane protein with EGF-like and two follistatin-like domains 2          |
| 223567_at   | 2.90 | up   | 181.76 | 61.13  | SEMA6B  | sema domain, transmembrane domain (TM), and cytoplasmic domain, (semaphorin) 6B |
| 223607_x_at | 2.86 | up   | 976.10 | 332.19 | ZSWIM1  | zinc finger, SWIM-type containing 1                                             |
| 223640_at   | 2.57 | up   | 361.82 | 137.44 | HCST    | hematopoietic cell signal transducer                                            |
| 223642_at   | 2.24 | up   | 647.03 | 282.13 | ZIC2    | Zic family member 2 (odd-paired homolog, Drosophila)                            |
| 223656_s_at | 2.77 | down | 148.77 | 401.66 | C1orf91 | chromosome 1 open reading frame 91                                              |
| 223679_at   | 2.26 | up   | 395.37 | 170.48 | CTNNB1  | catenin (cadherin-associated protein), beta 1, 88kDa                            |
| 223684_s_at | 2.28 | down | 312.80 | 693.90 | SMUG1   | single-strand-selective monofunctional uracil-DNA glycosylase 1                 |
| 223714_at   | 2.81 | up   | 839.17 | 291.45 | ZNF256  | zinc finger protein 256                                                         |
| 223729_at   | 2.76 | up   | 273.98 | 96.71  | CECR2   | cat eye syndrome chromosome region, candidate 2                                 |
| 223735_at   | 2.05 | down | 192.33 | 384.15 | ARL6    | ADP-ribosylation factor-like 6                                                  |
| 223824_at   | 3.14 | down | 186.89 | 571.43 | RNLS    | renalase, FAD-dependent amine oxidase                                           |

|             |       |      |         |         |          |                                                                      |
|-------------|-------|------|---------|---------|----------|----------------------------------------------------------------------|
| 223881_at   | 12.05 | down | 20.23   | 237.59  | ICA1L    | islet cell autoantigen 1,69kDa-like                                  |
| 223921_s_at | 2.28  | down | 143.90  | 320.42  | GBA2     | glucosidase, beta (bile acid) 2                                      |
| 223959_at   | 3.61  | up   | 140.14  | 37.85   | DNAL1    | dynein, axonemal, light chain 1                                      |
| 224127_at   | 35.90 | up   | 148.55  | 4.03    |          |                                                                      |
| 224172_at   | 4.34  | up   | 244.71  | 54.95   |          |                                                                      |
| 224216_at   | 2.16  | up   | 223.55  | 101.08  |          |                                                                      |
| 224289_s_at | 34.36 | up   | 142.88  | 4.05    | FKSG83   | FKSG83                                                               |
| 224315_at   | 2.16  | up   | 835.67  | 376.84  | DDX20    | DEAD (Asp-Glu-Ala-Asp) box polypeptide 20                            |
| 224319_s_at | 2.03  | up   | 868.91  | 417.04  | SMCR7L   | Smith-Magenis syndrome chromosome region, candidate 7-like           |
| 224323_s_at | 11.15 | down | 16.16   | 175.74  | MRO      | maestro                                                              |
| 224341_x_at | 5.63  | up   | 88.72   | 15.35   | TLR4     | toll-like receptor 4                                                 |
| 224354_at   | 2.23  | up   | 2116.92 | 926.71  |          |                                                                      |
| 224379_at   | 7.08  | up   | 145.63  | 20.06   | FTHL17   | ferritin, heavy polypeptide-like 17                                  |
| 224396_s_at | 4.43  | up   | 64.62   | 14.22   | ASPN     | asporin                                                              |
| 224397_s_at | 8.49  | down | 21.36   | 176.89  | TMTC1    | transmembrane and tetratricopeptide repeat containing 1              |
| 224434_s_at | 2.92  | down | 94.02   | 267.63  | MORG1    | mitogen-activated protein kinase organizer 1                         |
| 224435_at   | 20.39 | down | 19.30   | 383.67  | C10orf58 | chromosome 10 open reading frame 58                                  |
| 224444_s_at | 2.76  | down | 206.29  | 554.62  | C1orf97  | chromosome 1 open reading frame 97                                   |
| 224463_s_at | 2.79  | down | 138.95  | 377.86  | C11orf70 | chromosome 11 open reading frame 70                                  |
| 224470_at   | 2.34  | down | 258.36  | 590.65  | SEC22C   | SEC22 vesicle trafficking protein homolog C ( <i>S. cerevisiae</i> ) |
| 224474_x_at | 2.21  | down | 668.22  | 1439.34 | SMEK2    | SMEK homolog 2, suppressor of mek1 ( <i>Dictyostelium</i> )          |

|             |      |      |         |         |          |                                                                             |
|-------------|------|------|---------|---------|----------|-----------------------------------------------------------------------------|
| 224486_s_at | 2.35 | down | 341.82  | 783.28  | C15orf41 | chromosome 15 open reading frame 41                                         |
| 224559_at   | 5.11 | up   | 3372.23 | 643.50  | MALAT1   | metastasis associated lung adenocarcinoma transcript 1 (non-protein coding) |
| 224560_at   | 2.04 | up   | 861.39  | 411.11  | TIMP2    | TIMP metalloproteinase inhibitor 2                                          |
| 224646_x_at | 4.19 | up   | 6008.87 | 1397.49 | H19      | H19, imprinted maternally expressed transcript (non-protein coding)         |
| 224657_at   | 3.91 | down | 684.94  | 2613.32 | ERRFI1   | ERBB receptor feedback inhibitor 1                                          |
| 224658_x_at | 3.63 | up   | 667.23  | 179.10  | PACS1    | phosphofurin acidic cluster sorting protein 1                               |
| 224712_x_at | 2.21 | up   | 454.47  | 200.49  | C19orf42 | chromosome 19 open reading frame 42                                         |
| 224746_at   | 2.34 | down | 395.91  | 904.04  | KIAA1522 | KIAA1522                                                                    |
| 224759_s_at | 2.25 | down | 865.96  | 1901.37 | C12orf23 | chromosome 12 open reading frame 23                                         |
| 224772_at   | 2.15 | up   | 675.03  | 305.68  | NAV1     | neuron navigator 1                                                          |
| 224797_at   | 2.27 | down | 289.77  | 642.48  | ARRDC3   | arrestin domain containing 3                                                |
| 224819_at   | 4.85 | down | 59.92   | 283.39  | TCEAL8   | transcription elongation factor A (SII)-like 8                              |
| 224832_at   | 2.16 | down | 363.38  | 764.38  | DUSP16   | dual specificity phosphatase 16                                             |
| 224843_at   | 2.35 | down | 101.94  | 233.69  | SLAIN2   | SLAIN motif family, member 2                                                |
| 224920_x_at | 2.07 | up   | 636.05  | 300.01  | MYADM    | myeloid-associated differentiation marker                                   |
| 224970_at   | 2.62 | up   | 1555.13 | 578.25  | NFIA     | nuclear factor I                                                            |
| 224973_at   | 2.88 | up   | 345.74  | 117.04  | FAM46A   | family with sequence similarity 46, member A                                |
| 224997_x_at | 4.63 | up   | 1030.87 | 217.04  | H19      | H19, imprinted maternally expressed transcript (non-protein coding)         |

|             |       |      |        |         |           |                                                                             |
|-------------|-------|------|--------|---------|-----------|-----------------------------------------------------------------------------|
| 224998_at   | 2.62  | down | 892.54 | 2279.33 | CMTM4     | CKLF-like MARVEL transmembrane domain containing 4                          |
| 225056_at   | 19.09 | up   | 157.43 | 8.04    | SIPA1L2   | signal-induced proliferation-associated 1 like 2                            |
| 225067_at   | 2.70  | down | 285.05 | 750.77  | ULK3      | unc-51-like kinase 3 (C. elegans)                                           |
| 225076_s_at | 2.24  | down | 438.76 | 958.89  | ZNFX1     | zinc finger, NFX1-type containing 1                                         |
| 225129_at   | 2.35  | up   | 474.93 | 197.20  | CPNE2     | copine II                                                                   |
| 225142_at   | 3.58  | down | 69.90  | 244.13  | JHDM1D    | jumonji C domain containing histone demethylase 1 homolog D (S. cerevisiae) |
| 225146_at   | 2.24  | down | 156.52 | 342.14  | C9orf25   | chromosome 9 open reading frame 25                                          |
| 225171_at   | 2.06  | down | 140.56 | 282.25  | ARHGAP18  | Rho GTPase activating protein 18                                            |
| 225238_at   | 2.32  | up   | 231.47 | 97.17   | MSI2      | musashi homolog 2 (Drosophila)                                              |
| 225242_s_at | 6.65  | up   | 722.28 | 105.86  | CCDC80    | coiled-coil domain containing 80                                            |
| 225246_at   | 2.15  | down | 268.84 | 563.58  | STIM2     | stromal interaction molecule 2                                              |
| 225250_at   | 2.30  | up   | 211.17 | 89.69   | STIM2     | stromal interaction molecule 2                                              |
| 225262_at   | 3.78  | up   | 201.37 | 51.89   | FOSL2     | FOS-like antigen 2                                                          |
| 225354_s_at | 2.65  | up   | 342.01 | 125.77  | SH3BGRL2  | SH3 domain binding glutamic acid-rich protein like 2                        |
| 225355_at   | 2.07  | up   | 478.14 | 225.63  | NEURL1B   | neuralized homolog 1B (Drosophila)                                          |
| 225357_s_at | 2.23  | down | 231.23 | 503.81  | INO80     | INO80 homolog (S. cerevisiae)                                               |
| 225381_at   | 2.73  | down | 661.21 | 1760.28 | LOC399959 | hypothetical LOC399959                                                      |
| 225412_at   | 3.21  | down | 111.64 | 349.14  | TMEM87B   | transmembrane protein 87B                                                   |
| 225536_at   | 2.09  | down | 172.26 | 350.81  | TMEM54    | transmembrane protein 54                                                    |

|           |       |      |        |         |          |                                                                     |
|-----------|-------|------|--------|---------|----------|---------------------------------------------------------------------|
| 225537_at | 2.02  | down | 472.24 | 928.22  | TRAPPC6B | trafficking protein particle complex 6B                             |
| 225562_at | 2.17  | up   | 367.91 | 165.57  | RASA3    | RAS p21 protein activator 3                                         |
| 225569_at | 2.09  | up   | 949.21 | 443.14  | EIF2C2   | Eukaryotic translation initiation factor 2C, 2                      |
| 225598_at | 8.12  | up   | 361.48 | 43.42   | SLC45A4  | solute carrier family 45, member 4                                  |
| 225611_at | 2.37  | down | 96.86  | 223.57  | MAST4    | Microtubule associated serine                                       |
| 225619_at | 8.94  | up   | 312.63 | 34.08   | SLAIN1   | SLAIN motif family, member 1                                        |
| 225662_at | 3.11  | down | 561.34 | 1704.05 | ZAK      | sterile alpha motif and leucine zipper containing kinase AZK        |
| 225665_at | 7.70  | down | 283.79 | 2131.14 | ZAK      | sterile alpha motif and leucine zipper containing kinase AZK        |
| 225668_at | 3.89  | down | 55.57  | 210.86  | FAM173B  | family with sequence similarity 173, member B                       |
| 225696_at | 7.79  | up   | 329.60 | 41.27   | COPS7B   | COP9 constitutive photomorphogenic homolog subunit 7B (Arabidopsis) |
| 225728_at | 30.44 | up   | 79.06  | 2.53    | SORBS2   | sorbin and SH3 domain containing 2                                  |
| 225754_at | 2.23  | up   | 505.80 | 220.73  | AP1G1    | adaptor-related protein complex 1, gamma 1 subunit                  |
| 225776_at | 4.12  | down | 116.61 | 468.38  | RBMS2    | RNA binding motif, single stranded interacting protein 2            |
| 225778_at | 2.41  | up   | 352.64 | 142.89  | RBMS2    | RNA binding motif, single stranded interacting protein 2            |
| 225779_at | 2.04  | up   | 643.76 | 307.23  | SLC27A4  | solute carrier family 27 (fatty acid transporter), member 4         |
| 225841_at | 49.65 | up   | 200.11 | 3.93    | C1orf59  | chromosome 1 open reading frame 59                                  |

|             |       |      |         |        |          |                                                           |
|-------------|-------|------|---------|--------|----------|-----------------------------------------------------------|
| 225847_at   | 3.19  | up   | 151.00  | 46.11  | AADACL1  | arylacetylamide deacetylase-like 1                        |
| 225875_s_at | 10.94 | up   | 333.63  | 29.73  | NIPAL3   | NIPA-like domain containing 3                             |
| 225897_at   | 2.91  | up   | 994.62  | 333.28 | MARCKS   | myristoylated alanine-rich protein kinase C substrate     |
| 225914_s_at | 2.25  | up   | 314.57  | 136.34 | CAB39L   | calcium binding protein 39-like                           |
| 225923_at   | 2.14  | down | 179.78  | 374.52 | DDHD1    | DDHD domain containing 1                                  |
| 225965_at   | 2.09  | up   | 551.39  | 257.30 |          |                                                           |
| 225975_at   | 20.84 | up   | 307.91  | 14.41  | PCDH18   | protocadherin 18                                          |
| 225990_at   | 10.12 | up   | 3353.18 | 323.13 | BOC      | Boc homolog (mouse)                                       |
| 226065_at   | 2.33  | down | 226.58  | 515.14 | PRICKLE1 | prickle homolog 1 (Drosophila)                            |
| 226068_at   | 6.50  | up   | 155.63  | 23.35  | SYK      | spleen tyrosine kinase                                    |
| 226069_at   | 4.94  | down | 47.52   | 229.05 | PRICKLE1 | prickle homolog 1 (Drosophila)                            |
| 226074_at   | 4.33  | down | 51.24   | 216.25 | PPM1M    | protein phosphatase 1M (PP2C domain containing)           |
| 226081_at   | 2.02  | up   | 758.96  | 366.12 | LZIC     | leucine zipper and CTNNBIP1 domain containing             |
| 226156_at   | 2.05  | down | 198.37  | 396.94 | AKT2     | v-akt murine thymoma viral oncogene homolog 2             |
| 226220_at   | 17.85 | up   | 191.08  | 10.43  | METTL9   | Methyltransferase like 9                                  |
| 226306_at   | 7.07  | down | 56.46   | 389.42 | C6orf1   | chromosome 6 open reading frame 1                         |
| 226323_at   | 2.01  | up   | 892.53  | 433.26 | ZNF830   | zinc finger protein 830                                   |
| 226338_at   | 2.92  | up   | 773.19  | 258.54 | TMEM55A  | transmembrane protein 55A                                 |
| 226384_at   | 2.76  | down | 223.46  | 602.01 | PPAPDC1B | phosphatidic acid phosphatase type 2 domain containing 1B |
| 226393_at   | 8.72  | down | 22.11   | 188.04 | CYP2U1   | cytochrome P450, family 2, subfamily U, polypeptide 1     |

|             |       |      |         |         |          |                                                           |
|-------------|-------|------|---------|---------|----------|-----------------------------------------------------------|
| 226398_s_at | 2.31  | down | 813.92  | 1830.63 | C10orf4  | chromosome 10 open reading frame 4                        |
| 226404_at   | 3.36  | down | 111.62  | 365.96  | RBM39    | RNA binding motif protein 39                              |
| 226430_at   | 2.91  | down | 776.53  | 2199.91 | RELL1    | RELT-like 1                                               |
| 226468_at   | 3.77  | down | 282.81  | 1039.86 |          |                                                           |
| 226487_at   | 2.50  | up   | 340.37  | 132.94  | C12orf34 | chromosome 12 open reading frame 34                       |
| 226511_at   | 2.75  | down | 317.23  | 850.84  | WDR32    | WD repeat domain 32                                       |
| 226513_at   | 2.79  | down | 176.23  | 479.38  | ASB7     | ankyrin repeat and SOCS box-containing 7                  |
| 226562_at   | 2.33  | up   | 862.37  | 360.31  | ZSCAN29  | zinc finger and SCAN domain containing 29                 |
| 226573_at   | 21.09 | up   | 272.57  | 12.60   | DIRAS1   | DIRAS family, GTP-binding RAS-like 1                      |
| 226577_at   | 3.85  | up   | 715.33  | 181.16  | PSEN1    | presenilin 1                                              |
| 226608_at   | 2.33  | up   | 498.16  | 208.53  | C16orf87 | chromosome 16 open reading frame 87                       |
| 226613_at   | 2.25  | down | 104.16  | 228.84  | GATSL3   | GATS protein-like 3                                       |
| 226625_at   | 2.06  | up   | 187.40  | 88.52   | TGFBR3   | transforming growth factor, beta receptor III             |
| 226629_at   | 2.65  | up   | 247.31  | 91.02   | SLC43A2  | solute carrier family 43, member 2                        |
| 226667_x_at | 2.75  | up   | 468.18  | 165.90  | EPN1     | epsin 1                                                   |
| 226694_at   | 3.97  | up   | 245.45  | 60.31   | AKAP2    | A kinase (PRKA) anchor protein 2                          |
| 226704_at   | 2.77  | down | 66.56   | 179.82  | UBE2J2   | ubiquitin-conjugating enzyme E2, J2 (UBC6 homolog, yeast) |
| 226749_at   | 2.09  | down | 1374.35 | 2803.05 | MRPS9    | mitochondrial ribosomal protein S9                        |
| 226751_at   | 2.15  | up   | 545.55  | 247.23  | CNRIP1   | cannabinoid receptor interacting protein 1                |
| 226776_at   | 3.16  | up   | 232.49  | 71.78   | ENY2     | enhancer of yellow 2 homolog (Drosophila)                 |
| 226791_at   | 2.35  | up   | 209.18  | 86.73   | KIFC2    | kinesin family member C2                                  |

|             |       |      |         |         |          |                                                                        |
|-------------|-------|------|---------|---------|----------|------------------------------------------------------------------------|
| 226802_s_at | 2.05  | down | 172.34  | 344.42  | LOC96610 | BMS1 homolog, ribosome assembly protein (yeast) pseudogene             |
| 226805_at   | 2.35  | down | 274.63  | 629.73  |          |                                                                        |
| 226829_at   | 2.21  | down | 91.25   | 196.71  | AFAP1L2  | actin filament associated protein 1-like 2                             |
| 226842_at   | 2.18  | down | 192.92  | 410.72  | LOC90110 | hypothetical protein LOC90110                                          |
| 226849_at   | 2.50  | up   | 372.30  | 145.26  | DENND1A  | DENN                                                                   |
| 226923_at   | 2.20  | down | 305.79  | 657.26  | SCFD2    | sec1 family domain containing 2                                        |
| 226925_at   | 2.00  | up   | 320.33  | 156.09  | ACPL2    | acid phosphatase-like 2                                                |
| 226931_at   | 2.75  | down | 77.60   | 208.30  | TMTC1    | transmembrane and tetratricopeptide repeat containing 1                |
| 226941_at   | 2.06  | down | 549.15  | 1102.03 |          |                                                                        |
| 226974_at   | 3.40  | down | 44.00   | 145.84  | NEDD4L   | neural precursor cell expressed, developmentally down-regulated 4-like |
| 226989_at   | 2.09  | up   | 784.16  | 365.44  | RGMB     | RGM domain family, member B                                            |
| 227028_s_at | 2.01  | up   | 201.35  | 97.85   | DGCR2    | DiGeorge syndrome critical region gene 2                               |
| 227047_x_at | 2.69  | up   | 988.48  | 358.27  | ZBTB4    | zinc finger and BTB domain containing 4                                |
| 227089_at   | 2.67  | down | 88.35   | 230.04  |          |                                                                        |
| 227132_at   | 2.21  | up   | 481.14  | 212.66  | ZNF706   | zinc finger protein 706                                                |
| 227208_at   | 2.01  | down | 1304.55 | 2553.83 | CCDC84   | coiled-coil domain containing 84                                       |
| 227226_at   | 12.95 | up   | 133.21  | 10.03   | MRAP2    | melanocortin 2 receptor accessory protein 2                            |
| 227241_at   | 3.11  | down | 56.97   | 172.90  | MUC15    | mucin 15, cell surface associated                                      |
| 227284_at   | 2.30  | up   | 1108.37 | 470.55  | ZNF766   | zinc finger protein 766                                                |
| 227296_at   | 2.95  | down | 102.65  | 294.87  | MFSD3    | major facilitator superfamily domain containing 3                      |



|             |        |      |         |         |              |                                                            |
|-------------|--------|------|---------|---------|--------------|------------------------------------------------------------|
| 227303_at   | 2.26   | up   | 425.16  | 183.77  | ANKS3        | ankyrin repeat and sterile alpha motif domain containing 3 |
| 227318_at   | 2.21   | down | 161.61  | 348.27  |              |                                                            |
| 227335_at   | 2.21   | up   | 1252.47 | 552.02  | DIDO1        | death inducer-obliterator 1                                |
| 227352_at   | 2.26   | down | 224.38  | 495.02  | C19orf39     | chromosome 19 open reading frame 39                        |
| 227371_at   | 6.87   | down | 125.38  | 839.81  | BAIAP2L1     | BAI1-associated protein 2-like 1                           |
| 227378_x_at | 2.02   | down | 832.61  | 1640.60 | C16orf13     | chromosome 16 open reading frame 13                        |
| 227395_at   | 2.24   | down | 356.93  | 777.81  | TBCEL        | Tubulin folding cofactor E-like                            |
| 227399_at   | 101.25 | down | 3.98    | 392.58  | VGLL3        | vestigial like 3 (Drosophila)                              |
| 227444_at   | 35.96  | down | 6.69    | 234.47  | ARMCX4       | Armadillo repeat containing, X-linked 4                    |
| 227448_at   | 2.63   | up   | 329.21  | 122.00  | ARGLU1       | arginine and glutamate rich 1                              |
| 227493_s_at | 2.47   | down | 1734.32 | 4171.84 | KIAA1143     | KIAA1143                                                   |
| 227499_at   | 2.03   | down | 112.74  | 223.04  |              |                                                            |
| 227535_at   | 2.23   | down | 54.43   | 118.54  | C15orf24     | Chromosome 15 open reading frame 24                        |
| 227562_at   | 3.74   | up   | 309.08  | 80.64   | MAPKSP1      | MAPK scaffold protein 1                                    |
| 227563_at   | 2.08   | up   | 532.34  | 249.99  | FAM27E3      | family with sequence similarity 27, member E3              |
| 227568_at   | 2.31   | up   | 1602.44 | 675.47  | HECTD2       | HECT domain containing 2                                   |
| 227578_at   | 2.32   | down | 109.04  | 247.00  | LOC100128191 | hypothetical protein LOC100128191                          |
| 227582_at   | 3.65   | down | 167.15  | 594.14  | KLHDC9       | kelch domain containing 9                                  |
| 227598_at   | 2.83   | down | 110.31  | 304.68  | C7orf29      | chromosome 7 open reading frame 29                         |
| 227599_at   | 2.66   | up   | 374.15  | 136.95  | C3orf59      | chromosome 3 open reading frame 59                         |
| 227618_at   | 2.47   | down | 58.45   | 140.64  |              |                                                            |
| 227632_at   | 2.91   | down | 82.08   | 232.61  | TBC1D24      | TBC1 domain family, member 24                              |

|             |       |      |         |         |           |                                                                                  |
|-------------|-------|------|---------|---------|-----------|----------------------------------------------------------------------------------|
| 227654_at   | 3.97  | down | 294.31  | 1139.42 | FAM65C    | family with sequence similarity 65, member C                                     |
| 227677_at   | 17.30 | down | 12.57   | 212.01  | JAK3      | Janus kinase 3                                                                   |
| 227685_at   | 2.35  | down | 204.24  | 468.30  | TMF1      | TATA element modulatory factor 1                                                 |
| 227693_at   | 2.25  | up   | 184.64  | 80.15   | WDR20     | WD repeat domain 20                                                              |
| 227697_at   | 2.29  | up   | 249.49  | 106.20  | SOCS3     | suppressor of cytokine signaling 3                                               |
| 227756_at   | 21.63 | down | 9.25    | 195.09  | FAM81A    | family with sequence similarity 81, member A                                     |
| 227759_at   | 6.32  | up   | 250.39  | 38.63   | PCSK9     | proprotein convertase subtilisin                                                 |
| 227761_at   | 2.12  | up   | 404.22  | 185.61  | MYO5A     | myosin VA (heavy chain 12, myoxin)                                               |
| 227806_at   | 12.19 | down | 19.31   | 229.61  | C16orf74  | chromosome 16 open reading frame 74                                              |
| 227861_at   | 2.22  | down | 645.64  | 1395.11 | TMEM161B  | transmembrane protein 161B                                                       |
| 227866_at   | 4.67  | up   | 106.53  | 22.24   | LOC729436 | Hypothetical LOC729436                                                           |
| 227890_at   | 2.64  | up   | 459.93  | 169.67  | TMEM198   | transmembrane protein 198                                                        |
| 227891_s_at | 2.09  | down | 507.73  | 1035.39 | TAF15     | TAF15 RNA polymerase II, TATA box binding protein (TBP)-associated factor, 68kDa |
| 227917_at   | 2.48  | up   | 799.95  | 314.79  | FAM85A    | family with sequence similarity 85, member A                                     |
| 227947_at   | 3.68  | down | 143.31  | 513.90  | PHACTR2   | phosphatase and actin regulator 2                                                |
| 227980_at   | 2.24  | up   | 1063.03 | 462.65  | ZNF322A   | zinc finger protein 322A                                                         |
| 227991_x_at | 4.04  | down | 83.68   | 329.59  | ZBTB43    | zinc finger and BTB domain containing 43                                         |
| 228022_at   | 2.16  | up   | 177.38  | 79.99   | CCDC18    | coiled-coil domain containing 18                                                 |
| 228029_at   | 2.08  | down | 356.55  | 722.41  | ZNF721    | zinc finger protein 721                                                          |

|             |       |      |         |         |           |                                                                               |
|-------------|-------|------|---------|---------|-----------|-------------------------------------------------------------------------------|
| 228043_at   | 3.61  | up   | 466.24  | 125.83  | UTP15     | UTP15, U3 small nucleolar ribonucleoprotein, homolog ( <i>S. cerevisiae</i> ) |
| 228084_at   | 2.09  | down | 675.59  | 1379.54 | PLA2G12A  | phospholipase A2, group XIIA                                                  |
| 228091_at   | 3.55  | up   | 366.92  | 100.73  | STX17     | syntaxin 17                                                                   |
| 228159_at   | 2.59  | up   | 601.70  | 226.85  |           |                                                                               |
| 228170_at   | 2.04  | up   | 233.66  | 111.60  | OLIG1     | oligodendrocyte transcription factor 1                                        |
| 228177_at   | 14.52 | up   | 429.54  | 28.84   | CREBBP    | CREB binding protein                                                          |
| 228207_at   | 3.03  | down | 81.82   | 241.38  |           |                                                                               |
| 228225_at   | 2.43  | down | 100.23  | 237.14  | PXMP3     | peroxisomal membrane protein 3, 35kDa                                         |
| 228226_s_at | 2.70  | up   | 490.59  | 177.34  | ZNF775    | zinc finger protein 775                                                       |
| 228229_at   | 2.42  | down | 65.42   | 154.53  | ZNF526    | zinc finger protein 526                                                       |
| 228245_s_at | 2.19  | up   | 1828.23 | 812.55  | LOC728715 | similar to hCG38149                                                           |
| 228263_at   | 2.93  | up   | 213.01  | 70.99   | GRASP     | GRP1 (general receptor for phosphoinositides 1)-associated scaffold protein   |
| 228268_at   | 4.89  | up   | 360.56  | 71.87   | FMO2      | flavin containing monooxygenase 2 (non-functional)                            |
| 228275_at   | 6.32  | down | 39.88   | 245.75  |           |                                                                               |
| 228316_at   | 9.20  | down | 23.54   | 211.25  | C2orf63   | chromosome 2 open reading frame 63                                            |
| 228326_at   | 2.37  | up   | 248.45  | 102.21  | WDR27     | WD repeat domain 27                                                           |
| 228358_at   | 19.84 | down | 10.22   | 197.79  | SOX12     | SRY (sex determining region Y)-box 12                                         |
| 228380_at   | 2.24  | up   | 318.76  | 138.78  |           |                                                                               |
| 228385_at   | 2.37  | up   | 1381.05 | 568.07  | DDX59     | DEAD (Asp-Glu-Ala-Asp) box polypeptide 59                                     |
| 228391_at   | 3.28  | up   | 369.10  | 109.87  | CYP4V2    | cytochrome P450, family 4, subfamily V, polypeptide 2                         |
| 228395_at   | 3.03  | down | 95.55   | 281.90  | GLT8D1    | Glycosyltransferase 8 domain containing 1                                     |

|             |       |      |         |         |           |                                                                        |
|-------------|-------|------|---------|---------|-----------|------------------------------------------------------------------------|
| 228416_at   | 2.07  | up   | 480.41  | 226.67  | ACVR2A    | activin A receptor, type IIA                                           |
| 228435_at   | 3.42  | down | 92.03   | 306.91  |           |                                                                        |
| 228443_s_at | 5.37  | down | 191.05  | 1000.06 |           |                                                                        |
| 228455_at   | 2.24  | down | 153.65  | 336.09  | RBM15     | RNA binding motif protein 15                                           |
| 228465_at   | 2.86  | up   | 233.68  | 79.61   |           |                                                                        |
| 228480_at   | 2.32  | up   | 291.29  | 122.23  | VAPA      | VAMP (vesicle-associated membrane protein)-associated protein A, 33kDa |
| 228496_s_at | 5.47  | down | 92.60   | 494.30  | CRIM1     | Cysteine rich transmembrane BMP regulator 1 (chordin-like)             |
| 228507_at   | 2.16  | down | 340.94  | 719.08  |           |                                                                        |
| 228534_s_at | 3.81  | down | 52.53   | 195.25  |           |                                                                        |
| 228553_at   | 2.08  | down | 100.54  | 203.51  | ENAH      | Enabled homolog (Drosophila)                                           |
| 228580_at   | 10.04 | down | 17.80   | 174.25  | HTRA3     | HtrA serine peptidase 3                                                |
| 228582_x_at | 2.46  | up   | 390.33  | 154.91  |           |                                                                        |
| 228595_at   | 3.22  | down | 354.44  | 1111.74 | HSD17B1   | hydroxysteroid (17-beta) dehydrogenase 1                               |
| 228611_s_at | 2.41  | up   | 1496.24 | 604.11  |           |                                                                        |
| 228615_at   | 9.07  | up   | 162.65  | 17.48   | LOC286161 | hypothetical protein LOC286161                                         |
| 228646_at   | 2.43  | up   | 239.37  | 96.20   | PPP1R1C   | protein phosphatase 1, regulatory (inhibitor) subunit 1C               |
| 228658_at   | 3.15  | up   | 170.58  | 52.73   | MIAT      | myocardial infarction associated transcript (non-protein coding)       |
| 228697_at   | 2.08  | up   | 347.17  | 162.57  | HINT3     | histidine triad nucleotide binding protein 3                           |
| 228726_at   | 4.68  | down | 58.04   | 265.05  |           |                                                                        |
| 228763_at   | 2.47  | down | 264.87  | 637.09  | MDP-1     | magnesium-dependent phosphatase 1                                      |

|             |       |      |        |        |           |                                                  |
|-------------|-------|------|--------|--------|-----------|--------------------------------------------------|
| 228783_at   | 2.41  | up   | 221.89 | 89.58  | BVES      | blood vessel epicardial substance                |
| 228833_s_at | 10.22 | up   | 227.21 | 21.68  |           |                                                  |
| 228864_at   | 8.10  | up   | 172.63 | 20.78  | ZNF653    | zinc finger protein 653                          |
| 228890_at   | 5.47  | up   | 290.73 | 51.82  | ATOH8     | atonal homolog 8 (Drosophila)                    |
| 228907_at   | 5.95  | down | 38.38  | 222.81 |           |                                                  |
| 228944_at   | 2.15  | up   | 312.06 | 141.58 |           |                                                  |
| 228949_at   | 3.73  | up   | 232.34 | 60.70  | GPR177    | G protein-coupled receptor 177                   |
| 228967_at   | 15.04 | up   | 343.65 | 22.27  | EIF1      | Eukaryotic translation initiation factor 1       |
| 229018_at   | 2.02  | up   | 456.42 | 220.54 | C12orf26  | chromosome 12 open reading frame 26              |
| 229033_s_at | 4.50  | down | 68.90  | 302.35 | MUM1      | melanoma associated antigen (mutated) 1          |
| 229034_at   | 14.29 | up   | 194.55 | 13.27  | SOBP      | sine oculis binding protein homolog (Drosophila) |
| 229037_at   | 2.14  | up   | 212.61 | 96.95  | TRIM69    | Tripartite motif-containing 69                   |
| 229038_at   | 2.73  | down | 160.38 | 426.46 | CWF19L1   | CWF19-like 1, cell cycle control (S. pombe)      |
| 229054_at   | 3.65  | up   | 176.35 | 47.17  | C14orf181 | chromosome 14 open reading frame 181             |
| 229105_at   | 2.61  | down | 146.76 | 374.06 | GPR39     | G protein-coupled receptor 39                    |
| 229123_at   | 2.39  | down | 127.95 | 298.51 |           |                                                  |
| 229161_at   | 2.37  | down | 110.38 | 255.33 | IQCG      | IQ motif containing G                            |
| 229173_at   | 2.20  | up   | 362.71 | 160.70 | KIAA1715  | KIAA1715                                         |
| 229190_at   | 5.38  | up   | 187.58 | 33.98  |           |                                                  |
| 229216_s_at | 36.38 | up   | 194.55 | 5.21   | CSNK2A1   | Casein kinase 2, alpha 1 polypeptide             |
| 229246_at   | 6.24  | up   | 193.24 | 30.21  | FLJ44342  | hypothetical LOC645460                           |
| 229272_at   | 2.52  | up   | 350.77 | 135.73 | FNBP4     | formin binding protein 4                         |
| 229273_at   | 27.40 | up   | 98.49  | 3.50   | SALL1     | sal-like 1 (Drosophila)                          |
| 229283_at   | 2.50  | down | 163.35 | 398.00 | LOC728613 | programmed cell death 6 pseudogene               |
| 229291_at   | 2.47  | up   | 174.82 | 68.99  |           |                                                  |

|             |       |      |         |        |           |                                                           |
|-------------|-------|------|---------|--------|-----------|-----------------------------------------------------------|
| 229338_at   | 6.26  | down | 40.12   | 244.89 |           |                                                           |
| 229344_x_at | 2.02  | up   | 786.13  | 380.25 | RIMKLB    | ribosomal modification protein rimK-like family member B  |
| 229346_at   | 18.18 | down | 14.02   | 248.54 | NES       | nestin                                                    |
| 229357_at   | 3.82  | down | 207.52  | 773.34 | ADAMTS5   | ADAM metallopeptidase with thrombospondin type 1 motif, 5 |
| 229388_at   | 14.98 | down | 14.45   | 211.14 |           |                                                           |
| 229399_at   | 2.15  | down | 204.39  | 427.89 | C10orf118 | chromosome 10 open reading frame 118                      |
| 229400_at   | 33.39 | up   | 271.89  | 7.94   | HOXD10    | homeobox D10                                              |
| 229443_at   | 2.99  | down | 57.13   | 166.38 | C6orf125  | Chromosome 6 open reading frame 125                       |
| 229452_at   | 2.28  | down | 277.42  | 616.14 | TMEM88    | transmembrane protein 88                                  |
| 229478_x_at | 13.14 | up   | 175.94  | 13.05  | BIVM      | basic, immunoglobulin-like variable motif containing      |
| 229480_at   | 3.17  | down | 45.20   | 139.56 |           |                                                           |
| 229490_s_at | 2.90  | down | 59.73   | 168.69 |           |                                                           |
| 229543_at   | 49.80 | down | 2.52    | 122.58 | FAM26F    | Family with sequence similarity 26, member F              |
| 229558_at   | 2.18  | up   | 757.00  | 338.37 |           |                                                           |
| 229579_s_at | 4.83  | up   | 285.49  | 57.66  | DISP2     | dispatched homolog 2 (Drosophila)                         |
| 229587_at   | 2.19  | up   | 653.58  | 291.08 | UBA2      | ubiquitin-like modifier activating enzyme 2               |
| 229602_at   | 2.14  | up   | 177.73  | 80.87  |           |                                                           |
| 229603_at   | 2.15  | up   | 286.74  | 130.22 | BBS12     | Bardet-Biedl syndrome 12                                  |
| 229648_at   | 2.07  | up   | 281.17  | 132.46 | RICS      | Rho GTPase-activating protein                             |
| 229671_s_at | 2.56  | up   | 281.59  | 107.30 | C21orf45  | Chromosome 21 open reading frame 45                       |
| 229800_at   | 21.53 | up   | 1672.11 | 75.74  | DCLK1     | Doublecortin-like kinase 1                                |
| 229823_at   | 2.17  | down | 339.47  | 718.07 |           |                                                           |

|             |       |      |        |        |         |                                                         |
|-------------|-------|------|--------|--------|---------|---------------------------------------------------------|
| 229831_at   | 41.64 | up   | 101.93 | 2.39   | CNTN3   | contactin 3 (plasmacytoma associated)                   |
| 229850_at   | 2.41  | down | 83.37  | 195.54 | KDSR    | 3-ketodihydrosphingosine reductase                      |
| 229862_x_at | 2.04  | up   | 599.39 | 286.92 | ZBTB45  | zinc finger and BTB domain containing 45                |
| 229883_at   | 2.07  | up   | 335.51 | 157.92 | GRIN2D  | glutamate receptor, ionotropic, N-methyl D-aspartate 2D |
| 229902_at   | 2.86  | down | 69.34  | 193.07 | FLT4    | fms-related tyrosine kinase 4                           |
| 229910_at   | 19.90 | up   | 189.98 | 9.31   | SHE     | Src homology 2 domain containing E                      |
| 229939_at   | 2.19  | up   | 323.54 | 143.72 |         |                                                         |
| 229954_at   | 2.06  | up   | 426.74 | 202.08 | CHDH    | choline dehydrogenase                                   |
| 229956_at   | 2.19  | down | 45.44  | 97.12  | NR2C1   | nuclear receptor subfamily 2, group C, member 1         |
| 229969_at   | 2.27  | up   | 301.67 | 129.55 | SEC63   | SEC63 homolog (S. cerevisiae)                           |
| 229989_at   | 2.03  | down | 162.70 | 321.72 | FDXACB1 | ferredoxin-fold anticodon binding domain containing 1   |
| 229994_at   | 4.36  | up   | 185.11 | 41.44  | NFIA    | Nuclear factor I                                        |
| 230006_s_at | 2.15  | down | 215.99 | 453.07 | SVIP    | small VCP                                               |
| 230046_at   | 2.17  | down | 127.86 | 270.28 |         |                                                         |
| 230075_at   | 4.66  | down | 28.80  | 130.69 | RAB39B  | RAB39B, member RAS oncogene family                      |
| 230120_s_at | 2.82  | down | 123.87 | 340.65 | PLGLB2  | plasminogen-like B2                                     |
| 230141_at   | 2.06  | down | 146.87 | 294.62 | ARID4A  | AT rich interactive domain 4A (RBP1-like)               |
| 230156_x_at | 2.26  | up   | 199.92 | 86.12  | CHD2    | Chromodomain helicase DNA binding protein 2             |
| 230175_s_at | 2.65  | up   | 213.38 | 78.56  |         |                                                         |
| 230235_at   | 2.33  | down | 124.60 | 282.82 | MCTS1   | malignant T cell amplified sequence 1                   |
| 230241_at   | 3.93  | down | 81.05  | 310.56 |         |                                                         |

|             |       |      |        |        |            |                                                                                |
|-------------|-------|------|--------|--------|------------|--------------------------------------------------------------------------------|
| 230273_at   | 3.26  | up   | 216.40 | 64.81  | C6orf165   | chromosome 6 open reading frame 165                                            |
| 230334_at   | 3.80  | down | 53.24  | 197.29 |            |                                                                                |
| 230360_at   | 14.46 | up   | 116.44 | 7.85   | GLDN       | gliomedin                                                                      |
| 230421_at   | 2.03  | up   | 721.42 | 346.38 | ⟨FZp686E24 | similar to hypothetical protein 9630041N07                                     |
| 230441_at   | 3.77  | up   | 161.76 | 41.79  | PLEKHG4B   | pleckstrin homology domain containing, family G (with RhoGef domain) member 4B |
| 230494_at   | 2.50  | up   | 388.34 | 151.36 | SLC20A1    | Solute carrier family 20 (phosphate transporter), member 1                     |
| 230503_at   | 3.03  | down | 96.35  | 284.67 |            |                                                                                |
| 230561_s_at | 2.75  | down | 71.82  | 192.60 | C2orf67    | chromosome 2 open reading frame 67                                             |
| 230569_at   | 2.24  | up   | 244.41 | 106.59 | KIAA1430   | KIAA1430                                                                       |
| 230610_at   | 4.85  | down | 45.52  | 215.10 |            |                                                                                |
| 230626_at   | 2.03  | up   | 189.78 | 91.04  | TSPAN12    | tetraspanin 12                                                                 |
| 230651_at   | 2.21  | up   | 350.75 | 155.08 |            |                                                                                |
| 230708_at   | 3.52  | down | 91.36  | 313.14 | PRICKLE1   | prickle homolog 1 (Drosophila)                                                 |
| 230712_at   | 2.01  | down | 271.65 | 531.47 | NBPF1      | neuroblastoma breakpoint family, member 1                                      |
| 230742_at   | 2.11  | down | 115.49 | 237.21 | RBM6       | RNA binding motif protein 6                                                    |
| 230760_at   | 29.61 | down | 4.17   | 120.38 | ZFY        | zinc finger protein, Y-linked                                                  |
| 230764_at   | 6.28  | up   | 160.72 | 24.94  |            |                                                                                |
| 230779_at   | 2.13  | up   | 562.79 | 257.34 | TNRC6B     | trinucleotide repeat containing 6B                                             |
| 230782_at   | 2.02  | up   | 202.00 | 97.54  | SORD       | sorbitol dehydrogenase                                                         |
| 230820_at   | 2.30  | down | 268.14 | 600.32 |            |                                                                                |
| 230832_at   | 2.24  | up   | 447.62 | 194.67 | RTF1       | Rtf1, Paf1                                                                     |
| 230852_at   | 6.53  | down | 25.21  | 160.60 | STAC3      | SH3 and cysteine rich domain 3                                                 |
| 230880_at   | 5.51  | down | 39.59  | 212.65 | KIAA1652   | KIAA1652 protein                                                               |
| 230888_at   | 3.48  | up   | 152.89 | 42.78  | WDR91      | WD repeat domain 91                                                            |
| 230890_at   | 4.97  | up   | 178.90 | 35.06  |            |                                                                                |



|             |       |      |        |         |           |                                                                                            |
|-------------|-------|------|--------|---------|-----------|--------------------------------------------------------------------------------------------|
| 230893_at   | 2.07  | down | 180.14 | 363.58  | DNAJC21   | DnaJ (Hsp40) homolog, subfamily C, member 21                                               |
| 230898_at   | 2.43  | down | 183.85 | 436.13  |           |                                                                                            |
| 230958_s_at | 2.17  | up   | 551.77 | 247.88  |           |                                                                                            |
| 231022_at   | 2.74  | down | 469.34 | 1252.31 |           |                                                                                            |
| 231069_at   | 2.02  | up   | 272.30 | 131.53  |           |                                                                                            |
| 231074_at   | 17.35 | down | 7.92   | 134.05  |           |                                                                                            |
| 231107_at   | 2.17  | down | 173.77 | 367.52  |           |                                                                                            |
| 231114_at   | 3.24  | up   | 164.19 | 49.45   | SPATA22   | spermatogenesis associated 22                                                              |
| 231116_at   | 4.94  | down | 38.02  | 183.09  |           |                                                                                            |
| 231134_at   | 2.29  | up   | 305.33 | 130.26  | C20orf79  | chromosome 20 open reading frame 79                                                        |
| 231174_s_at | 2.46  | down | 88.50  | 212.48  |           |                                                                                            |
| 231208_at   | 8.03  | down | 15.76  | 123.37  |           |                                                                                            |
| 231225_at   | 4.90  | down | 29.86  | 142.58  |           |                                                                                            |
| 231247_s_at | 15.86 | up   | 109.60 | 6.74    | LOC727820 | Hypothetical protein LOC727820                                                             |
| 231249_at   | 3.24  | down | 54.24  | 171.25  |           |                                                                                            |
| 231274_s_at | 4.63  | down | 84.57  | 382.14  |           |                                                                                            |
| 231277_x_at | 2.95  | up   | 362.36 | 119.78  | DTWD2     | DTW domain containing 2                                                                    |
| 231294_at   | 2.03  | down | 69.73  | 137.82  | STT3B     | STT3, subunit of the oligosaccharyltransferase complex, homolog B ( <i>S. cerevisiae</i> ) |
| 231353_at   | 9.43  | down | 11.60  | 106.65  |           |                                                                                            |
| 231365_at   | 5.96  | down | 35.72  | 207.60  |           |                                                                                            |
| 231370_at   | 2.18  | up   | 254.51 | 113.67  |           |                                                                                            |
| 231397_at   | 17.96 | up   | 107.04 | 5.81    | PAP2D     | phosphatidic acid phosphatase type 2                                                       |
| 231482_at   | 9.56  | up   | 145.84 | 14.88   |           |                                                                                            |
| 231632_at   | 18.75 | up   | 204.80 | 10.65   | C19orf69  | chromosome 19 open reading frame 69                                                        |
| 231638_at   | 2.46  | up   | 228.91 | 90.71   | MGC52282  | transmembrane protease, serine pseudogene                                                  |
| 231683_at   | 46.70 | up   | 169.08 | 3.53    | GLYAT     | glycine-N-acyltransferase                                                                  |

|             |       |      |         |        |             |                                                                             |
|-------------|-------|------|---------|--------|-------------|-----------------------------------------------------------------------------|
| 231701_s_at | 4.21  | up   | 296.66  | 68.71  | SMCR8       | Smith-Magenis syndrome chromosome region, candidate 8                       |
| 231720_s_at | 3.22  | down | 131.55  | 412.99 | JAM3        | junctional adhesion molecule 3                                              |
| 231725_at   | 2.01  | up   | 374.12  | 181.48 | PCDHB2      | protocadherin beta 2                                                        |
| 231727_s_at | 2.79  | down | 347.62  | 945.52 | MIF4GD      | MIF4G domain containing                                                     |
| 231735_s_at | 2.03  | up   | 1154.45 | 554.86 | MALAT1      | metastasis associated lung adenocarcinoma transcript 1 (non-protein coding) |
| 231776_at   | 3.17  | down | 148.49  | 458.27 | EOMES       | eomesodermin homolog (Xenopus laevis)                                       |
| 231791_at   | 16.95 | up   | 129.21  | 7.43   | ASAH2B      | N-acylsphingosine amidohydrolase (non-lysosomal ceramidase) 2B              |
| 231794_at   | 3.04  | up   | 211.69  | 67.82  | CTLA4       | cytotoxic T-lymphocyte-associated protein 4                                 |
| 231797_at   | 2.24  | down | 62.30   | 136.34 | SIX4        | SIX homeobox 4                                                              |
| 231858_x_at | 2.91  | up   | 344.25  | 115.15 | KFZp761E198 | DKFZp761E198 protein                                                        |
| 231863_at   | 2.80  | up   | 204.72  | 71.33  | ING3        | inhibitor of growth family, member 3                                        |
| 231904_at   | 2.60  | down | 314.04  | 795.55 | U2AF1       | U2 small nuclear RNA auxiliary factor 1                                     |
| 231906_at   | 6.22  | up   | 327.23  | 51.29  | HOXD8       | homeobox D8                                                                 |
| 231920_s_at | 3.50  | up   | 497.42  | 138.62 | CSNK1G1     | casein kinase 1, gamma 1                                                    |
| 231952_at   | 2.02  | down | 170.43  | 336.07 |             |                                                                             |
| 231988_x_at | 2.49  | down | 131.47  | 319.78 | ZNF490      | zinc finger protein 490                                                     |
| 231989_s_at | 2.16  | down | 468.61  | 987.76 | LOC641298   | SMG1 homolog, phosphatidylinositol 3-kinase-related kinase pseudogene       |

|             |       |      |         |         |                                                                                       |
|-------------|-------|------|---------|---------|---------------------------------------------------------------------------------------|
| 231992_x_at | 2.18  | up   | 1092.83 | 487.95  | LOC493754 RAB guanine nucleotide exchange factor (GEF) 1 pseudogene                   |
| 232011_s_at | 7.64  | up   | 146.20  | 18.66   | MAP1LC3A microtubule-associated protein 1 light chain 3 alpha                         |
| 232016_at   | 4.16  | up   | 195.84  | 45.86   | MTMR15 Myotubularin related protein 15                                                |
| 232030_at   | 6.16  | down | 23.19   | 139.33  | KIAA1632 KIAA1632                                                                     |
| 232034_at   | 3.77  | down | 53.13   | 195.50  | LOC203274 Hypothetical protein LOC203274                                              |
| 232064_at   | 2.47  | up   | 116.05  | 45.85   |                                                                                       |
| 232071_at   | 4.44  | up   | 204.76  | 45.01   | MRPL19 Mitochondrial ribosomal protein L19                                            |
| 232113_at   | 2.49  | down | 411.54  | 997.29  |                                                                                       |
| 232119_at   | 18.41 | down | 7.62    | 136.84  | SYNPO2 synaptopodin 2                                                                 |
| 232254_at   | 2.53  | down | 286.20  | 706.28  |                                                                                       |
| 232256_s_at | 2.81  | down | 88.58   | 243.07  | LOC401321 hypothetical LOC401321                                                      |
| 232266_x_at | 2.04  | down | 1896.65 | 3764.75 | CDC2L5 Cell division cycle 2-like 5 (cholinesterase-related cell division controller) |
| 232270_at   | 2.05  | up   | 546.49  | 260.06  | C9orf3 Chromosome 9 open reading frame 3                                              |
| 232324_x_at | 7.91  | down | 18.60   | 143.45  |                                                                                       |
| 232332_at   | 4.66  | down | 25.98   | 118.17  | KIAA1210 KIAA1210                                                                     |
| 232340_at   | 2.24  | down | 125.23  | 274.08  | LOC388889 hypothetical LOC388889                                                      |
| 232346_at   | 4.95  | down | 94.25   | 455.27  | LOC388692 hypothetical LOC388692                                                      |
| 232363_at   | 2.37  | down | 61.33   | 141.78  |                                                                                       |
| 232376_at   | 4.46  | down | 36.80   | 159.93  | PCCA Propionyl Coenzyme A carboxylase, alpha polypeptide                              |
| 232380_at   | 2.33  | down | 51.44   | 116.70  | FGGY FGGY carbohydrate kinase domain containing                                       |
| 232405_at   | 3.88  | down | 89.62   | 338.93  |                                                                                       |
| 232455_x_at | 3.00  | up   | 575.55  | 187.10  | LOC340085 hypothetical protein LOC340085                                              |

|             |       |      |         |         |           |                                                        |
|-------------|-------|------|---------|---------|-----------|--------------------------------------------------------|
| 232466_at   | 5.98  | down | 32.52   | 189.73  | CUL4A     | Cullin 4A                                              |
| 232516_x_at | 2.33  | up   | 325.18  | 136.24  |           |                                                        |
| 232557_at   | 6.44  | up   | 217.12  | 32.87   | LOC390595 | similar to ubiquitin-associated protein 1 (predicted)  |
| 232563_at   | 2.06  | down | 98.79   | 198.12  | ZNF684    | zinc finger protein 684                                |
| 232565_at   | 3.06  | up   | 352.98  | 112.50  |           |                                                        |
| 232580_x_at | 2.14  | down | 202.39  | 422.43  |           |                                                        |
| 232592_at   | 2.13  | down | 118.11  | 245.52  |           |                                                        |
| 232600_at   | 3.85  | up   | 174.33  | 44.19   |           |                                                        |
| 232679_at   | 11.53 | down | 9.81    | 110.29  |           |                                                        |
| 232691_at   | 5.76  | up   | 133.63  | 22.62   | SFXN5     | sideroflexin 5                                         |
| 232704_s_at | 5.49  | up   | 195.24  | 34.70   | LRRFIP2   | leucine rich repeat (in FLII) interacting protein 2    |
| 232706_s_at | 2.21  | up   | 242.68  | 106.99  | TRABD     | TraB domain containing                                 |
| 232723_at   | 10.61 | up   | 115.28  | 10.59   |           |                                                        |
| 232726_at   | 4.11  | up   | 168.50  | 39.98   |           |                                                        |
| 232730_at   | 2.09  | up   | 192.70  | 89.72   | C19orf44  | chromosome 19 open reading frame 44                    |
| 232759_at   | 2.41  | up   | 425.87  | 172.40  |           |                                                        |
| 232793_at   | 34.92 | down | 4.79    | 163.21  |           |                                                        |
| 232797_at   | 2.16  | down | 300.87  | 632.36  |           |                                                        |
| 232853_at   | 36.07 | down | 4.92    | 173.07  |           |                                                        |
| 232918_at   | 3.28  | up   | 186.82  | 55.60   | LOC541471 | Hypothetical LOC541471                                 |
| 232988_at   | 4.22  | up   | 302.16  | 69.87   | KIAA0182  | KIAA0182                                               |
| 232999_at   | 17.64 | up   | 112.98  | 6.24    |           |                                                        |
| 233055_at   | 3.65  | up   | 254.05  | 67.89   |           |                                                        |
| 233111_at   | 2.70  | down | 116.70  | 307.04  |           |                                                        |
| 233191_at   | 2.16  | down | 100.21  | 211.19  | RUFY2     | RUN and FYVE domain containing 2                       |
| 233192_s_at | 2.18  | down | 146.25  | 311.35  | RUFY2     | RUN and FYVE domain containing 2                       |
| 233208_x_at | 2.12  | up   | 2239.25 | 1029.01 | CPSF2     | cleavage and polyadenylation specific factor 2, 100kDa |
| 233213_at   | 2.77  | down | 70.79   | 191.05  |           |                                                        |
| 233227_at   | 3.46  | down | 32.03   | 108.09  | KIAA1109  | KIAA1109                                               |
| 233276_at   | 3.02  | up   | 148.82  | 48.06   |           |                                                        |

|             |       |      |        |        |         |                                                                  |
|-------------|-------|------|--------|--------|---------|------------------------------------------------------------------|
| 233290_at   | 5.66  | down | 41.16  | 227.19 |         |                                                                  |
| 233301_at   | 3.85  | up   | 224.43 | 56.80  | OXCT2   | 3-oxoacid CoA transferase 2                                      |
| 233307_x_at | 2.45  | down | 410.47 | 981.85 |         |                                                                  |
| 233329_s_at | 2.41  | down | 372.17 | 876.19 | KRCC1   | lysine-rich coiled-coil 1                                        |
| 233330_s_at | 3.60  | down | 51.49  | 180.94 |         |                                                                  |
| 233350_s_at | 4.06  | up   | 629.90 | 151.38 | TEX264  | testis expressed 264                                             |
| 233353_at   | 39.41 | up   | 145.53 | 3.60   | FER1L5  | fer-1-like 5 (C. elegans)                                        |
| 233360_at   | 2.31  | up   | 191.98 | 81.18  | UBE2I   | ubiquitin-conjugating enzyme E2I (UBC9 homolog, yeast)           |
| 233364_s_at | 3.87  | down | 174.67 | 658.79 |         |                                                                  |
| 233386_at   | 2.10  | up   | 286.19 | 132.83 |         |                                                                  |
| 233411_at   | 4.02  | up   | 242.21 | 58.79  |         |                                                                  |
| 233420_at   | 27.19 | down | 3.79   | 100.34 |         |                                                                  |
| 233446_at   | 3.96  | up   | 324.05 | 79.78  | ONECUT2 | one cut homeobox 2                                               |
| 233450_at   | 12.41 | down | 16.18  | 195.80 |         |                                                                  |
| 233481_at   | 4.62  | up   | 143.19 | 30.24  |         |                                                                  |
| 233518_at   | 2.68  | up   | 218.80 | 79.57  |         |                                                                  |
| 233520_s_at | 2.14  | up   | 206.63 | 93.96  | CMYA5   | cardiomyopathy associated 5                                      |
| 233575_s_at | 3.93  | up   | 369.39 | 91.53  | TLE4    | transducin-like enhancer of split 4 (E(sp1) homolog, Drosophila) |
| 233596_at   | 20.08 | down | 14.89  | 291.42 |         |                                                                  |
| 233608_at   | 5.27  | down | 77.99  | 400.49 |         |                                                                  |
| 233627_at   | 32.72 | down | 3.12   | 99.50  |         |                                                                  |
| 233632_s_at | 2.22  | down | 242.07 | 524.70 | XRN1    | 5'-3' exoribonuclease 1                                          |
| 233649_at   | 2.15  | up   | 166.13 | 75.29  | KATNAL2 | katanin p60 subunit A-like 2                                     |
| 233657_at   | 8.88  | up   | 192.12 | 21.09  | OPN5    | opsin 5                                                          |
| 233705_at   | 2.75  | down | 63.37  | 170.01 |         |                                                                  |
| 233714_at   | 31.36 | down | 4.07   | 124.35 |         |                                                                  |
| 233736_at   | 3.12  | up   | 217.51 | 67.90  | OR51J1  | olfactory receptor, family 51, subfamily J, member 1 (gene)      |
| 233788_at   | 2.24  | up   | 216.79 | 94.39  |         |                                                                  |
| 233824_at   | 2.01  | down | 181.82 | 356.36 |         |                                                                  |

|             |       |      |        |        |           |                                                                                      |
|-------------|-------|------|--------|--------|-----------|--------------------------------------------------------------------------------------|
| 233836_at   | 10.39 | down | 18.86  | 190.99 | TNRC6A    | trinucleotide repeat containing 6A                                                   |
| 233847_x_at | 3.21  | down | 82.73  | 259.08 |           |                                                                                      |
| 233869_x_at | 2.20  | down | 53.20  | 114.08 |           |                                                                                      |
| 233887_at   | 3.34  | down | 53.73  | 174.84 | GPR126    | G protein-coupled receptor 126                                                       |
| 233899_x_at | 3.44  | up   | 405.69 | 115.14 | ZBTB10    | zinc finger and BTB domain containing 10                                             |
| 233937_at   | 6.12  | down | 21.14  | 126.05 | GGNBP2    | gametogenetin binding protein 2                                                      |
| 233946_at   | 12.32 | up   | 169.05 | 13.38  | SMU1      | smu-1 suppressor of mec-8 and unc-52 homolog (C. elegans)                            |
| 233951_at   | 4.47  | down | 41.46  | 180.61 |           |                                                                                      |
| 233978_at   | 8.65  | down | 22.82  | 192.55 | PTPRE     | Protein tyrosine phosphatase, receptor type, E                                       |
| 234005_x_at | 2.47  | up   | 515.10 | 203.11 | STK36     | serine                                                                               |
| 234059_at   | 18.16 | down | 7.98   | 141.20 |           |                                                                                      |
| 234127_at   | 14.79 | down | 12.18  | 175.63 |           |                                                                                      |
| 234192_s_at | 2.21  | down | 400.78 | 864.62 | GKAP1     | G kinase anchoring protein 1                                                         |
| 234219_at   | 2.11  | up   | 92.17  | 42.59  |           |                                                                                      |
| 234260_at   | 27.85 | down | 2.75   | 74.78  |           |                                                                                      |
| 234266_at   | 3.06  | down | 46.87  | 139.74 |           |                                                                                      |
| 234326_at   | 33.70 | up   | 153.56 | 4.44   |           |                                                                                      |
| 234361_at   | 11.38 | down | 10.73  | 118.96 | CREB3L3   | cAMP responsive element binding protein 3-like 3                                     |
| 234426_x_at | 3.41  | up   | 139.52 | 39.90  |           |                                                                                      |
| 234485_at   | 2.03  | up   | 220.16 | 105.86 | LOC340947 | similar to eukaryotic translation initiation factor 3, subunit 6 interacting protein |
| 234490_at   | 2.37  | up   | 166.20 | 68.39  |           |                                                                                      |
| 234500_at   | 3.71  | down | 37.06  | 134.12 |           |                                                                                      |
| 234525_at   | 14.77 | up   | 164.00 | 10.82  |           |                                                                                      |
| 234597_at   | 48.39 | up   | 142.99 | 2.88   |           |                                                                                      |
| 234624_at   | 3.41  | down | 39.22  | 130.52 |           |                                                                                      |
| 234650_at   | 4.35  | up   | 189.71 | 42.57  |           |                                                                                      |
| 234671_at   | 3.71  | up   | 270.49 | 71.02  | KRTAP4-2  | keratin associated protein 4-2                                                       |

|             |       |      |         |        |         |                                                         |
|-------------|-------|------|---------|--------|---------|---------------------------------------------------------|
| 234697_x_at | 2.90  | down | 70.14   | 198.25 | C3orf31 | chromosome 3 open reading frame 31                      |
| 234698_at   | 21.85 | down | 8.21    | 174.98 | N6AMT1  | N-6 adenine-specific DNA methyltransferase 1 (putative) |
| 234710_s_at | 2.79  | down | 118.08  | 321.70 | PARP6   | poly (ADP-ribose) polymerase family, member 6           |
| 234719_at   | 2.22  | down | 75.79   | 164.30 | LAMA3   | laminin, alpha 3                                        |
| 234789_at   | 4.04  | up   | 99.69   | 24.08  |         |                                                         |
| 234793_at   | 9.53  | up   | 153.07  | 15.66  |         |                                                         |
| 234826_at   | 3.58  | down | 44.24   | 154.37 |         |                                                         |
| 234862_at   | 3.18  | up   | 169.23  | 51.94  |         |                                                         |
| 234952_s_at | 2.08  | up   | 245.19  | 115.16 | PHRF1   | PHD and ring finger domains 1                           |
| 234963_s_at | 11.19 | up   | 193.14  | 16.83  | FA2H    | fatty acid 2-hydroxylase                                |
| 234970_at   | 5.13  | up   | 405.89  | 77.14  | TC2N    | tandem C2 domains, nuclear                              |
| 235003_at   | 2.31  | up   | 1250.27 | 527.78 | UHMK1   | U2AF homology motif (UHM) kinase 1                      |
| 235009_at   | 2.67  | up   | 232.37  | 84.96  | BOD1L   | bioorientation of chromosomes in cell division 1-like   |
| 235016_at   | 2.21  | down | 159.36  | 343.35 | REEP3   | receptor accessory protein 3                            |
| 235029_at   | 12.63 | down | 19.44   | 239.33 | GINS4   | GINS complex subunit 4 (Sld5 homolog)                   |
| 235049_at   | 14.14 | up   | 236.52  | 16.31  | ADCY1   | adenylate cyclase 1 (brain)                             |
| 235051_at   | 3.08  | up   | 158.95  | 50.27  | CCDC50  | coiled-coil domain containing 50                        |
| 235062_at   | 10.46 | down | 14.85   | 151.44 | PIH1D2  | PIH1 domain containing 2                                |
| 235069_at   | 2.39  | up   | 356.59  | 145.32 | TATDN3  | TatD DNase domain containing 3                          |
| 235078_at   | 2.05  | up   | 446.50  | 212.38 |         |                                                         |
| 235104_at   | 2.41  | up   | 203.57  | 82.24  | ERAP2   | endoplasmic reticulum aminopeptidase 2                  |
| 235109_at   | 2.91  | down | 115.69  | 328.58 |         |                                                         |

|             |       |      |        |         |             |                                                                                  |
|-------------|-------|------|--------|---------|-------------|----------------------------------------------------------------------------------|
| 235126_at   | 2.04  | down | 701.33 | 1394.79 | LQK1        | hypothetical LOC642946                                                           |
| 235131_at   | 2.33  | up   | 264.96 | 110.75  | RHOJ        | ras homolog gene family, member J                                                |
| 235132_at   | 2.88  | down | 194.44 | 545.10  | LOC254128   | hypothetical protein LOC254128                                                   |
| 235140_at   | 7.98  | up   | 203.52 | 24.85   | SHROOM1     | Shroom family member 1                                                           |
| 235154_at   | 2.34  | up   | 341.54 | 142.21  | TAF3        | TAF3 RNA polymerase II, TATA box binding protein (TBP)-associated factor, 140kDa |
| 235161_at   | 5.39  | up   | 183.73 | 33.22   |             |                                                                                  |
| 235205_at   | 3.03  | up   | 466.80 | 150.19  | LOC10012825 | hypothetical protein LOC100128259                                                |
| 235268_at   | 4.74  | up   | 179.63 | 36.96   |             |                                                                                  |
| 235273_at   | 2.20  | down | 135.61 | 290.48  | DYX1C1      | dyslexia susceptibility 1 candidate 1                                            |
| 235302_at   | 2.24  | up   | 286.19 | 124.30  |             |                                                                                  |
| 235306_at   | 10.49 | up   | 78.10  | 7.26    | GIMAP8      | GTPase, IMAP family member 8                                                     |
| 235338_s_at | 8.22  | down | 20.68  | 165.84  | SETDB2      | SET domain, bifurcated 2                                                         |
| 235349_at   | 3.42  | down | 116.47 | 388.35  | FAM82A1     | family with sequence similarity 82, member A1                                    |
| 235368_at   | 3.93  | down | 130.21 | 498.60  | ADAMTS5     | ADAM metallopeptidase with thrombospondin type 1 motif, 5                        |
| 235381_at   | 2.06  | down | 199.50 | 401.27  |             |                                                                                  |
| 235406_x_at | 3.28  | down | 84.49  | 269.84  |             |                                                                                  |
| 235441_at   | 2.47  | up   | 210.49 | 83.24   |             |                                                                                  |
| 235443_at   | 2.20  | down | 108.13 | 232.41  | LOC10013106 | hypothetical protein LOC100131067                                                |
| 235452_at   | 2.35  | down | 135.91 | 312.06  |             |                                                                                  |
| 235453_at   | 5.54  | up   | 193.12 | 33.98   | TOR1AIP2    | torsin A interacting protein 2                                                   |
| 235463_s_at | 2.06  | down | 171.26 | 344.10  | LASS6       | LAG1 homolog, ceramide synthase 6                                                |



|             |      |      |         |         |           |                                                                   |
|-------------|------|------|---------|---------|-----------|-------------------------------------------------------------------|
| 235467_s_at | 4.36 | up   | 158.25  | 35.38   | KCNC4     | potassium voltage-gated channel, Shaw-related subfamily, member 4 |
| 235472_at   | 2.23 | up   | 563.64  | 246.66  | FUT10     | fucosyltransferase 10 (alpha (1,3) fucosyltransferase)            |
| 235497_at   | 7.66 | up   | 129.10  | 16.43   | LOC643837 | hypothetical LOC643837                                            |
| 235505_s_at | 2.13 | up   | 304.01  | 139.38  |           |                                                                   |
| 235511_at   | 4.07 | up   | 183.66  | 43.96   |           |                                                                   |
| 235515_at   | 2.12 | down | 582.93  | 1202.96 | C19orf46  | chromosome 19 open reading frame 46                               |
| 235530_at   | 3.13 | down | 194.17  | 592.44  |           |                                                                   |
| 235562_at   | 2.21 | up   | 151.92  | 67.01   | C3orf70   | chromosome 3 open reading frame 70                                |
| 235579_at   | 2.52 | up   | 1438.33 | 555.84  | SFRS2IP   | splicing factor, arginine                                         |
| 235580_at   | 2.80 | up   | 346.02  | 120.41  | ZNF141    | zinc finger protein 141                                           |
| 235608_at   | 2.19 | up   | 183.51  | 81.74   |           |                                                                   |
| 235613_at   | 3.08 | down | 102.58  | 308.48  |           |                                                                   |
| 235630_at   | 2.08 | up   | 204.77  | 95.99   |           |                                                                   |
| 235653_s_at | 2.16 | down | 243.26  | 511.61  | THAP6     | THAP domain containing 6                                          |
| 235675_at   | 2.12 | up   | 116.28  | 53.53   | DHFRL1    | dihydrofolate reductase-like 1                                    |
| 235676_at   | 2.52 | down | 63.05   | 154.81  |           |                                                                   |
| 235692_at   | 2.12 | up   | 387.29  | 177.80  | SH3KBP1   | SH3-domain kinase binding protein 1                               |
| 235693_at   | 2.27 | down | 341.71  | 757.16  |           |                                                                   |
| 235705_at   | 2.08 | up   | 522.89  | 244.62  |           |                                                                   |
| 235717_at   | 7.69 | down | 10.01   | 75.05   | ZNF229    | zinc finger protein 229                                           |
| 235719_at   | 4.13 | up   | 279.26  | 65.92   | CYP4V2    | cytochrome P450, family 4, subfamily V, polypeptide 2             |
| 235744_at   | 2.07 | down | 79.06   | 159.33  | PPTC7     | PTC7 protein phosphatase homolog (S. cerevisiae)                  |
| 235749_at   | 3.11 | down | 359.62  | 1090.66 | UGCGL2    | UDP-glucose ceramide glucosyltransferase-like 2                   |

|             |       |      |        |         |           |                                                            |
|-------------|-------|------|--------|---------|-----------|------------------------------------------------------------|
| 235751_s_at | 10.74 | up   | 929.77 | 84.37   | VMO1      | vitelline membrane outer layer 1 homolog (chicken)         |
| 235759_at   | 12.80 | up   | 110.60 | 8.43    |           |                                                            |
| 235786_at   | 2.26  | down | 247.94 | 546.52  |           |                                                            |
| 235789_at   | 4.12  | down | 87.01  | 349.37  | KDM4B     | lysine (K)-specific demethylase 4B                         |
| 235819_at   | 2.93  | down | 40.21  | 115.03  |           |                                                            |
| 235844_at   | 61.95 | up   | 238.67 | 3.76    | PHTF1     | putative homeodomain transcription factor 1                |
| 235861_at   | 2.13  | up   | 249.98 | 114.52  |           |                                                            |
| 235870_at   | 2.52  | up   | 209.29 | 80.96   | LOC339524 | hypothetical LOC339524                                     |
| 235875_at   | 11.08 | down | 13.59  | 146.75  |           |                                                            |
| 235909_at   | 19.39 | up   | 246.07 | 12.37   | ASPRV1    | Aspartic peptidase, retroviral-like 1                      |
| 235921_at   | 2.64  | up   | 203.28 | 74.96   |           |                                                            |
| 235971_at   | 10.66 | down | 10.69  | 111.11  |           |                                                            |
| 235983_at   | 7.46  | up   | 99.70  | 13.03   |           |                                                            |
| 235999_at   | 4.14  | up   | 273.10 | 64.35   |           |                                                            |
| 236012_at   | 2.04  | up   | 237.54 | 113.64  | PSMF1     | proteasome (prosome, macropain) inhibitor subunit 1 (PI31) |
| 236038_at   | 3.51  | up   | 100.95 | 28.07   |           |                                                            |
| 236109_at   | 4.10  | down | 33.63  | 134.58  | RPUSD4    | RNA pseudouridylate synthase domain containing 4           |
| 236149_at   | 10.01 | down | 35.46  | 346.14  |           |                                                            |
| 236150_at   | 4.10  | down | 58.65  | 234.39  | LOC123688 | similar to RIKEN cDNA C630028N24 gene                      |
| 236210_at   | 2.27  | up   | 307.51 | 131.83  |           |                                                            |
| 236215_at   | 4.51  | up   | 92.00  | 19.90   |           |                                                            |
| 236220_at   | 4.82  | up   | 200.16 | 40.48   |           |                                                            |
| 236241_at   | 2.25  | down | 114.26 | 250.89  | MED31     | mediator complex subunit 31                                |
| 236250_at   | 3.46  | up   | 532.18 | 149.90  | AFG3L1    | AFG3 ATPase family gene 3-like 1 (S. cerevisiae)           |
| 236251_at   | 2.36  | down | 735.98 | 1691.65 |           |                                                            |
| 236263_at   | 2.47  | up   | 172.16 | 67.94   | SHH       | Sonic hedgehog homolog (Drosophila)                        |

|             |       |      |        |        |             |                                                                                         |
|-------------|-------|------|--------|--------|-------------|-----------------------------------------------------------------------------------------|
| 236300_at   | 10.47 | down | 90.42  | 923.25 |             |                                                                                         |
| 236312_at   | 2.34  | down | 405.54 | 927.17 |             |                                                                                         |
| 236361_at   | 3.44  | down | 52.27  | 175.53 | GALNTL2     | UDP-N-acetyl-alpha-D-galactosamine:polypeptide N-acetylgalactosaminyltransferase-like 2 |
| 236400_at   | 2.03  | up   | 219.86 | 105.64 |             |                                                                                         |
| 236402_at   | 2.07  | down | 276.40 | 557.90 |             |                                                                                         |
| 236404_at   | 2.84  | up   | 162.57 | 55.84  |             |                                                                                         |
| 236417_at   | 3.41  | down | 52.89  | 175.66 |             |                                                                                         |
| 236420_s_at | 13.91 | down | 9.55   | 129.47 | ANO4        | anoctamin 4                                                                             |
| 236449_at   | 5.19  | up   | 309.71 | 58.17  |             |                                                                                         |
| 236477_at   | 3.05  | up   | 225.16 | 72.06  | PRPF40A     | PRP40 pre-mRNA processing factor 40 homolog A (S. cerevisiae)                           |
| 236518_at   | 3.46  | up   | 179.73 | 50.64  | KIAA1984    | KIAA1984                                                                                |
| 236561_at   | 2.61  | down | 79.78  | 202.99 | TGFBR1      | Transforming growth factor, beta receptor 1                                             |
| 236591_at   | 2.10  | up   | 119.96 | 55.75  |             |                                                                                         |
| 236605_at   | 2.16  | down | 114.48 | 241.40 | EIF3K       | eukaryotic translation initiation factor 3, subunit K                                   |
| 236611_at   | 2.99  | down | 120.29 | 350.69 | LOC10012967 | similar to hCG2042915                                                                   |
| 236626_at   | 15.31 | down | 10.78  | 161.02 | ALG1        | asparagine-linked glycosylation 1, beta-1,4-mannosyltransferase homolog (S. cerevisiae) |
| 236640_at   | 4.42  | down | 66.52  | 286.69 | LOC399959   | Hypothetical gene supported by BX647608                                                 |
| 236655_at   | 2.38  | down | 254.27 | 591.02 | TPD52       | tumor protein D52                                                                       |
| 236656_s_at | 3.84  | down | 100.61 | 376.61 | LOC10013050 | hypothetical protein LOC100130506                                                       |
| 236675_at   | 4.15  | down | 34.76  | 140.73 | RPA1        | replication protein A1, 70kDa                                                           |
| 236701_at   | 2.19  | down | 128.54 | 275.08 | GSG1L       | GSG1-like                                                                               |
| 236716_at   | 7.32  | up   | 257.36 | 34.27  |             |                                                                                         |

|             |       |      |        |        |             |                                                                            |
|-------------|-------|------|--------|--------|-------------|----------------------------------------------------------------------------|
| 236717_at   | 11.87 | down | 17.02  | 196.90 | FAM179A     | family with sequence similarity 179, member A                              |
| 236776_at   | 2.17  | up   | 229.22 | 102.88 | CCDC50      | coiled-coil domain containing 50                                           |
| 236831_at   | 2.39  | up   | 353.58 | 144.02 |             |                                                                            |
| 236836_at   | 3.95  | down | 145.02 | 558.51 | TRIM62      | tripartite motif-containing 62                                             |
| 236845_at   | 3.49  | up   | 360.17 | 100.58 |             |                                                                            |
| 236861_at   | 15.79 | up   | 232.46 | 14.35  | LOC10013074 | similar to hCG2042068                                                      |
| 236892_s_at | 2.18  | down | 139.58 | 296.80 |             |                                                                            |
| 236927_at   | 2.36  | up   | 230.81 | 95.41  | SVEP1       | sushi, von Willebrand factor type A, EGF and pentraxin domain containing 1 |
| 236930_at   | 2.19  | down | 74.63  | 159.68 | NUMB        | Numb homolog (Drosophila)                                                  |
| 236948_x_at | 40.66 | up   | 91.06  | 2.18   | SFRS11      | Splicing factor, arginine                                                  |
| 236951_at   | 5.12  | up   | 243.88 | 46.45  | NSFL1C      | NSFL1 (p97) cofactor (p47)                                                 |
| 236974_at   | 16.46 | up   | 248.38 | 14.71  | GIGYF2      | GRB10 interacting GYF protein 2                                            |
| 237052_x_at | 2.55  | down | 271.90 | 674.89 |             |                                                                            |
| 237068_at   | 2.92  | up   | 130.47 | 43.63  | GPHA2       | glycoprotein hormone alpha 2                                               |
| 237121_at   | 25.92 | up   | 127.01 | 4.78   |             |                                                                            |
| 237168_at   | 42.72 | up   | 162.92 | 3.72   |             |                                                                            |
| 237230_at   | 16.09 | up   | 291.13 | 17.64  |             |                                                                            |
| 237262_at   | 3.22  | up   | 492.80 | 149.02 | WDR34       | WD repeat domain 34                                                        |
| 237264_at   | 4.45  | up   | 258.13 | 56.55  |             |                                                                            |
| 237287_at   | 4.28  | up   | 176.34 | 40.13  |             |                                                                            |
| 237302_at   | 25.81 | up   | 147.70 | 5.58   |             |                                                                            |
| 237311_at   | 2.63  | up   | 368.98 | 136.72 |             |                                                                            |
| 237329_at   | 5.02  | down | 22.23  | 108.87 |             |                                                                            |
| 237337_at   | 2.11  | up   | 223.28 | 103.23 |             |                                                                            |
| 237391_at   | 26.17 | down | 3.50   | 89.34  |             |                                                                            |
| 237531_at   | 4.13  | down | 43.42  | 174.66 | C2orf3      | Chromosome 2 open reading frame 3                                          |
| 237536_at   | 3.64  | down | 44.93  | 159.56 | LOC10012897 | hypothetical LOC100128977                                                  |

|             |       |      |        |        |           |                                                                          |
|-------------|-------|------|--------|--------|-----------|--------------------------------------------------------------------------|
| 237565_at   | 5.01  | down | 29.52  | 144.10 |           |                                                                          |
| 237597_at   | 10.89 | up   | 110.81 | 9.92   |           |                                                                          |
| 237602_at   | 28.51 | down | 3.09   | 86.02  |           |                                                                          |
| 237614_at   | 2.26  | up   | 158.66 | 68.59  | LOC285740 | hypothetical LOC285740                                                   |
| 237627_at   | 11.45 | up   | 123.62 | 10.53  |           |                                                                          |
| 237632_at   | 2.54  | up   | 147.74 | 56.78  |           |                                                                          |
| 237669_at   | 2.62  | up   | 141.79 | 52.67  |           |                                                                          |
| 237703_at   | 2.33  | down | 127.26 | 289.64 |           |                                                                          |
| 237709_at   | 2.30  | down | 107.03 | 240.38 |           |                                                                          |
| 237778_at   | 3.06  | up   | 207.89 | 66.27  |           |                                                                          |
| 237782_at   | 4.26  | up   | 186.87 | 42.73  |           |                                                                          |
| 237817_at   | 2.00  | up   | 295.01 | 143.58 | SSR3      | Signal sequence receptor, gamma<br>(translocon-associated protein gamma) |
| 237884_x_at | 2.65  | up   | 153.51 | 56.41  | TRPM7     | transient receptor potential cation channel,<br>subfamily M, member 7    |
| 237889_s_at | 6.24  | up   | 97.37  | 15.22  | LOC553137 | Hypothetical LOC553137                                                   |
| 237895_at   | 2.26  | down | 162.93 | 359.52 |           |                                                                          |
| 237905_at   | 3.73  | down | 44.74  | 162.59 | KRT25     | keratin 25                                                               |
| 237968_at   | 2.38  | down | 76.42  | 177.43 | ATL2      | atlastin GTPase 2                                                        |
| 237987_x_at | 4.42  | down | 30.73  | 132.47 |           |                                                                          |
| 238001_at   | 2.25  | down | 129.47 | 284.06 | KCTD6     | potassium channel tetramerisation domain<br>containing 6                 |
| 238004_at   | 55.50 | up   | 200.52 | 3.52   | PGBD2     | piggyBac transposable element derived 2                                  |
| 238026_at   | 2.08  | up   | 755.77 | 354.87 | RPL35A    | ribosomal protein L35a                                                   |
| 238090_at   | 10.42 | down | 11.81  | 119.94 | HGSNAT    | heparan-alpha-glucosaminide N-<br>acetyltransferase                      |
| 238095_at   | 3.47  | down | 46.31  | 156.68 | GATA5     | GATA binding protein 5                                                   |
| 238104_at   | 17.92 | down | 11.64  | 203.46 |           |                                                                          |
| 238109_at   | 46.36 | up   | 222.33 | 4.68   |           |                                                                          |
| 238121_at   | 2.06  | down | 342.56 | 689.37 | GK5       | glycerol kinase 5 (putative)                                             |

|             |       |      |        |         |              |                                                                                 |
|-------------|-------|------|--------|---------|--------------|---------------------------------------------------------------------------------|
| 238124_at   | 2.25  | up   | 200.13 | 86.59   | MYOM3        | myomesin family, member 3                                                       |
| 238179_at   | 11.09 | up   | 187.04 | 16.45   |              |                                                                                 |
| 238204_at   | 2.91  | up   | 165.55 | 55.52   |              |                                                                                 |
| 238308_at   | 6.97  | up   | 150.85 | 21.10   | LOC100133232 | hypothetical protein LOC100133236                                               |
| 238341_at   | 10.44 | down | 20.54  | 209.04  |              |                                                                                 |
| 238404_x_at | 4.25  | up   | 261.20 | 59.92   | SEZ6L2       | Seizure related 6 homolog (mouse)-like 2                                        |
| 238421_at   | 2.31  | down | 106.29 | 239.23  | RC3H2        | ring finger and CCCH-type zinc finger domains 2                                 |
| 238439_at   | 10.71 | down | 27.06  | 282.64  | ANKRD22      | ankyrin repeat domain 22                                                        |
| 238448_at   | 3.36  | up   | 293.18 | 85.18   | MRPL19       | mitochondrial ribosomal protein L19                                             |
| 238453_at   | 2.97  | up   | 616.24 | 202.19  | FGFBP3       | fibroblast growth factor binding protein 3                                      |
| 238464_at   | 5.50  | up   | 173.71 | 30.77   | LOC100134364 | hypothetical protein LOC100134365                                               |
| 238470_at   | 2.51  | down | 128.48 | 314.73  | SYS1         | SYS1 Golgi-localized integral membrane protein homolog ( <i>S. cerevisiae</i> ) |
| 238477_at   | 2.41  | down | 614.54 | 1444.77 |              |                                                                                 |
| 238484_s_at | 8.72  | down | 7.82   | 66.46   |              |                                                                                 |
| 238495_at   | 2.15  | down | 71.36  | 149.34  |              |                                                                                 |
| 238501_at   | 2.37  | down | 135.27 | 312.88  |              |                                                                                 |
| 238547_at   | 2.84  | down | 138.02 | 381.60  | HEXIM2       | hexamethylene bis-acetamide inducible 2                                         |
| 238548_at   | 5.29  | up   | 130.72 | 24.08   |              |                                                                                 |
| 238550_at   | 2.25  | down | 82.48  | 180.86  | RUFY2        | RUN and FYVE domain containing 2                                                |
| 238551_at   | 2.30  | down | 391.53 | 876.73  | FUT11        | fucosyltransferase 11 (alpha (1,3) fucosyltransferase)                          |
| 238557_at   | 6.92  | down | 64.96  | 438.42  | LOC100144606 | hypothetical transcript                                                         |
| 238575_at   | 2.27  | down | 245.82 | 542.97  | OSBPL6       | oxysterol binding protein-like 6                                                |

|             |       |      |         |        |           |                                                                  |
|-------------|-------|------|---------|--------|-----------|------------------------------------------------------------------|
| 238578_at   | 12.46 | up   | 179.21  | 14.02  | TMEM182   | transmembrane protein 182                                        |
| 238589_s_at | 2.04  | down | 328.60  | 654.14 | DIS3L2    | DIS3 mitotic control homolog (S. cerevisiae)-like 2              |
| 238602_at   | 2.19  | down | 148.15  | 315.87 |           |                                                                  |
| 238615_at   | 22.45 | down | 4.68    | 102.45 | ERLIN2    | ER lipid raft associated 2                                       |
| 238618_at   | 5.38  | up   | 181.86  | 32.97  | NF2       | neurofibromin 2 (merlin)                                         |
| 238675_x_at | 3.30  | up   | 570.06  | 168.53 | BTF3L4    | basic transcription factor 3-like 4                              |
| 238678_at   | 2.86  | up   | 472.58  | 161.37 | tcag7.907 | hypothetical LOC402483                                           |
| 238687_x_at | 2.64  | up   | 181.17  | 66.89  | ZNF770    | zinc finger protein 770                                          |
| 238691_at   | 2.67  | up   | 238.93  | 87.23  | SNHG10    | small nucleolar RNA host gene 10 (non-protein coding)            |
| 238692_at   | 2.24  | down | 35.81   | 78.10  | BTBD11    | BTB (POZ) domain containing 11                                   |
| 238714_at   | 2.31  | down | 336.43  | 758.60 | YARS      | tyrosyl-tRNA synthetase                                          |
| 238744_at   | 2.33  | up   | 164.13  | 68.66  |           |                                                                  |
| 238751_at   | 29.95 | up   | 148.87  | 4.85   |           |                                                                  |
| 238760_at   | 2.84  | up   | 308.35  | 105.78 |           |                                                                  |
| 238778_at   | 60.57 | up   | 172.62  | 2.78   | MPP7      | membrane protein, palmitoylated 7 (MAGUK p55 subfamily member 7) |
| 238785_at   | 3.68  | up   | 191.10  | 50.68  | PCNX      | pecanex homolog (Drosophila)                                     |
| 238792_at   | 5.23  | up   | 179.39  | 33.44  |           |                                                                  |
| 238881_at   | 4.79  | up   | 254.87  | 51.93  | C9orf85   | chromosome 9 open reading frame 85                               |
| 238912_x_at | 2.08  | up   | 1223.26 | 573.44 |           |                                                                  |
| 238936_at   | 2.11  | down | 144.29  | 296.32 | TM9SF1    | Transmembrane 9 superfamily member 1                             |
| 238948_at   | 42.30 | down | 4.76    | 196.14 |           |                                                                  |
| 238982_at   | 8.42  | down | 19.35   | 158.76 | DENR      | density-regulated protein                                        |
| 238994_at   | 2.16  | down | 140.17  | 295.58 | OTUD7B    | OTU domain containing 7B                                         |

|             |       |      |        |        |            |                                                             |
|-------------|-------|------|--------|--------|------------|-------------------------------------------------------------|
| 239010_at   | 10.58 | down | 13.16  | 135.76 | FLJ39632   | Hypothetical LOC642477                                      |
| 239022_at   | 2.40  | down | 64.90  | 152.17 | SSTR2      | somatostatin receptor 2                                     |
| 239031_at   | 2.10  | up   | 193.06 | 89.73  |            |                                                             |
| 239038_at   | 8.32  | down | 21.79  | 176.79 | C1orf52    | chromosome 1 open reading frame 52                          |
| 239056_at   | 2.55  | up   | 639.72 | 244.41 | SEC22C     | SEC22 vesicle trafficking protein homolog C (S. cerevisiae) |
| 239091_at   | 2.15  | up   | 408.69 | 185.23 | HOTAIR     | hox transcript antisense RNA (non-protein coding)           |
| 239121_at   | 5.01  | up   | 192.35 | 37.41  |            |                                                             |
| 239153_at   | 7.34  | down | 51.15  | 365.97 |            |                                                             |
| 239176_at   | 18.21 | up   | 176.73 | 9.46   | EZH1       | enhancer of zeste homolog 1 (Drosophila)                    |
| 239198_at   | 2.09  | up   | 131.86 | 61.37  |            |                                                             |
| 239202_at   | 7.91  | down | 14.51  | 111.96 | FBXL20     | F-box and leucine-rich repeat protein 20                    |
| 239211_at   | 11.19 | up   | 197.01 | 17.17  |            |                                                             |
| 239223_s_at | 2.35  | down | 107.17 | 245.59 |            |                                                             |
| 239243_at   | 2.28  | down | 142.66 | 317.51 | ZNF638     | Zinc finger protein 638                                     |
| 239245_at   | 3.03  | up   | 175.98 | 56.67  | MTMR15     | myotubularin related protein 15                             |
| 239253_at   | 3.03  | up   | 224.69 | 72.26  |            |                                                             |
| 239289_x_at | 2.54  | up   | 412.44 | 158.59 |            |                                                             |
| 239295_at   | 4.94  | up   | 229.23 | 45.23  | SRp35      | serine-arginine repressor protein (35 kDa)                  |
| 239383_at   | 2.03  | up   | 348.46 | 167.70 | JC10012971 | hypothetical LOC100129716                                   |
| 239395_at   | 47.26 | down | 4.96   | 228.67 |            |                                                             |
| 239438_at   | 10.19 | up   | 86.96  | 8.32   | RAPGEF6    | Rap guanine nucleotide exchange factor (GEF) 6              |
| 239439_at   | 2.19  | down | 93.87  | 200.60 | AFF4       | AF4                                                         |
| 239462_at   | 3.99  | up   | 323.08 | 78.93  | ZNF284     | zinc finger protein 284                                     |



|             |       |      |        |        |              |                                                         |
|-------------|-------|------|--------|--------|--------------|---------------------------------------------------------|
| 239466_at   | 2.73  | up   | 780.42 | 279.21 | LOC344595    | hypothetical LOC344595                                  |
| 239468_at   | 21.28 | up   | 80.57  | 3.69   | MKX          | mohawk homeobox                                         |
| 239473_x_at | 2.78  | down | 72.30  | 196.18 | MAP6D1       | MAP6 domain containing 1                                |
| 239478_x_at | 2.12  | up   | 194.12 | 89.40  |              |                                                         |
| 239556_at   | 3.06  | down | 38.91  | 116.27 | LOC645513    | Hypothetical LOC645513                                  |
| 239571_at   | 2.19  | up   | 385.21 | 171.56 |              |                                                         |
| 239579_at   | 2.48  | down | 54.05  | 130.52 | EPHX4        | epoxide hydrolase 4                                     |
| 239629_at   | 8.02  | down | 20.92  | 163.61 | CFLAR        | CASP8 and FADD-like apoptosis regulator                 |
| 239651_at   | 2.05  | down | 98.96  | 197.75 | ANAPC5       | anaphase promoting complex subunit 5                    |
| 239699_s_at | 2.07  | down | 211.89 | 427.23 | PMS2L1       | postmeiotic segregation increased 2-like 1 pseudogene   |
| 239715_at   | 4.09  | down | 51.74  | 206.33 |              |                                                         |
| 239725_at   | 2.12  | up   | 314.11 | 144.12 | PGAP1        | post-GPI attachment to proteins 1                       |
| 239735_at   | 2.00  | down | 443.91 | 867.23 |              |                                                         |
| 239742_at   | 2.01  | up   | 445.93 | 216.66 | TULP4        | Tubby like protein 4                                    |
| 239749_at   | 3.11  | down | 28.16  | 85.39  | FAF1         | Fas (TNFRSF6) associated factor 1                       |
| 239753_at   | 2.12  | up   | 155.62 | 71.72  | LOC441383    | hypothetical gene supported by AF086559; BC065734       |
| 239758_at   | 25.74 | down | 11.88  | 298.16 |              |                                                         |
| 239804_at   | 2.16  | up   | 228.96 | 103.57 |              |                                                         |
| 239808_at   | 41.73 | up   | 248.67 | 5.81   |              |                                                         |
| 239814_at   | 2.37  | down | 152.85 | 352.92 |              |                                                         |
| 239816_at   | 2.01  | up   | 272.72 | 132.00 |              |                                                         |
| 239841_at   | 2.87  | down | 263.85 | 738.25 |              |                                                         |
| 239852_at   | 3.08  | down | 83.90  | 251.88 | MMAA         | methylmalonic aciduria (cobalamin deficiency) cblA type |
| 239860_at   | 8.96  | down | 18.68  | 163.27 | LOC100130211 | LP2209                                                  |
| 239867_at   | 24.93 | up   | 149.22 | 5.83   |              |                                                         |
| 239892_at   | 26.05 | down | 8.59   | 218.17 |              |                                                         |
| 239904_at   | 67.43 | up   | 96.83  | 1.40   |              |                                                         |
| 239911_at   | 3.37  | up   | 356.24 | 103.12 | ONECUT2      | one cut homeobox 2                                      |

|             |       |      |        |        |              |                                                         |
|-------------|-------|------|--------|--------|--------------|---------------------------------------------------------|
| 239949_at   | 4.05  | down | 66.78  | 263.96 | THNSL2       | threonine synthase-like 2 ( <i>S. cerevisiae</i> )      |
| 239954_at   | 4.37  | down | 24.17  | 102.99 | ZNF160       | zinc finger protein 160                                 |
| 239973_at   | 2.56  | up   | 293.04 | 111.48 |              |                                                         |
| 240016_at   | 2.82  | down | 40.37  | 111.12 |              |                                                         |
| 240038_at   | 52.62 | up   | 184.39 | 3.42   |              |                                                         |
| 240044_x_at | 38.62 | down | 5.00   | 188.10 | TNRC6B       | Trinucleotide repeat containing 6B                      |
| 240069_at   | 2.17  | down | 109.79 | 232.50 |              |                                                         |
| 240125_at   | 2.95  | down | 78.92  | 226.91 |              |                                                         |
| 240191_at   | 3.28  | up   | 118.13 | 35.07  | ZNF543       | Zinc finger protein 543                                 |
| 240224_at   | 26.71 | down | 11.36  | 295.86 |              |                                                         |
| 240231_at   | 2.74  | up   | 427.34 | 152.18 |              |                                                         |
| 240243_at   | 2.30  | down | 49.67  | 111.47 |              |                                                         |
| 240245_at   | 3.19  | down | 128.23 | 398.85 |              |                                                         |
| 240268_at   | 7.60  | up   | 121.29 | 15.56  | LOC440117    | hypothetical gene supported by BC037858                 |
| 240291_at   | 11.74 | up   | 161.11 | 13.38  |              |                                                         |
| 240316_at   | 2.39  | up   | 214.48 | 87.45  | C9orf57      | chromosome 9 open reading frame 57                      |
| 240319_at   | 2.16  | up   | 253.23 | 114.08 |              |                                                         |
| 240330_at   | 2.41  | down | 45.66  | 107.38 |              |                                                         |
| 240337_at   | 47.39 | down | 4.26   | 196.77 | RHOA         | Ras homolog gene family, member A                       |
| 240366_at   | 30.18 | down | 3.37   | 99.19  | LOC100129562 | hypothetical protein LOC100129562                       |
| 240382_at   | 2.06  | down | 184.94 | 372.17 | LOC100131914 | hypothetical protein LOC100131914                       |
| 240436_at   | 2.47  | up   | 209.65 | 82.84  | LOC650794    | Similar to FRAS1 related extracellular matrix protein 2 |
| 240445_at   | 3.40  | down | 55.47  | 183.76 |              |                                                         |
| 240446_at   | 2.53  | up   | 313.88 | 120.76 |              |                                                         |
| 240514_at   | 3.12  | down | 38.47  | 117.04 | PGA3         | Pepsinogen 3, group I (pepsinogen A)                    |
| 240529_at   | 3.27  | up   | 207.83 | 61.90  |              |                                                         |
| 240549_at   | 9.34  | down | 10.36  | 94.35  |              |                                                         |
| 240586_at   | 2.04  | down | 73.66  | 146.39 | ENAM         | Enamelin                                                |

|             |       |      |        |        |          |                                                    |
|-------------|-------|------|--------|--------|----------|----------------------------------------------------|
| 240592_at   | 2.13  | down | 446.21 | 927.99 | LCORL    | ligand dependent nuclear receptor corepressor-like |
| 240649_at   | 18.23 | up   | 166.83 | 8.92   |          |                                                    |
| 240701_at   | 7.12  | up   | 135.53 | 18.55  | GSDMB    | gasdermin B                                        |
| 240728_at   | 2.17  | down | 99.72  | 210.83 | PLCB4    | Phospholipase C, beta 4                            |
| 240737_at   | 44.97 | down | 7.08   | 310.62 |          |                                                    |
| 240772_at   | 15.91 | up   | 105.80 | 6.48   |          |                                                    |
| 240791_at   | 2.75  | up   | 136.35 | 48.39  |          |                                                    |
| 240798_at   | 5.05  | up   | 386.81 | 74.66  |          |                                                    |
| 240816_at   | 2.90  | down | 69.92  | 197.78 |          |                                                    |
| 240832_at   | 86.55 | up   | 127.14 | 1.43   |          |                                                    |
| 240849_at   | 3.75  | down | 51.56  | 188.54 |          |                                                    |
| 240857_at   | 44.78 | up   | 107.45 | 2.34   | DNAH9    | dynein, axonemal, heavy chain 9                    |
| 240903_at   | 5.22  | up   | 220.24 | 41.11  |          |                                                    |
| 240919_at   | 3.11  | down | 77.69  | 235.69 |          |                                                    |
| 240962_at   | 17.02 | down | 15.16  | 251.56 |          |                                                    |
| 240964_at   | 3.15  | up   | 129.23 | 40.04  |          |                                                    |
| 240995_at   | 2.59  | up   | 117.20 | 44.10  |          |                                                    |
| 241007_at   | 2.31  | up   | 283.14 | 119.39 |          |                                                    |
| 241021_at   | 20.09 | down | 11.73  | 229.82 |          |                                                    |
| 241045_at   | 5.77  | down | 26.95  | 151.71 | JMJD5    | jumonji domain containing 5                        |
| 241069_at   | 23.02 | up   | 169.33 | 7.17   |          |                                                    |
| 241076_at   | 8.94  | up   | 154.23 | 16.82  |          |                                                    |
| 241097_at   | 19.77 | up   | 222.12 | 10.95  |          |                                                    |
| 241123_at   | 7.88  | down | 13.78  | 105.89 |          |                                                    |
| 241175_at   | 6.72  | down | 30.35  | 198.83 |          |                                                    |
| 241198_s_at | 3.17  | down | 140.82 | 435.08 | C11orf70 | chromosome 11 open reading frame 70                |
| 241200_x_at | 7.38  | up   | 95.24  | 12.57  |          |                                                    |
| 241209_at   | 26.74 | down | 2.31   | 60.33  | IQWD1    | IQ motif and WD repeats 1                          |
| 241243_at   | 6.52  | up   | 310.14 | 46.38  |          |                                                    |
| 241244_at   | 2.49  | up   | 155.88 | 61.07  |          |                                                    |
| 241262_at   | 2.90  | up   | 192.35 | 64.56  |          |                                                    |
| 241355_at   | 2.07  | up   | 189.87 | 89.36  | HR       | hairless homolog (mouse)                           |
| 241360_at   | 2.02  | down | 120.03 | 236.80 | CCDC15   | coiled-coil domain containing 15                   |

|             |       |      |        |        |           |                                                                          |
|-------------|-------|------|--------|--------|-----------|--------------------------------------------------------------------------|
| 241366_at   | 6.22  | down | 27.99  | 169.68 | RBAK      | RB-associated KRAB zinc finger                                           |
| 241374_at   | 3.14  | up   | 253.34 | 78.64  | TMEM39A   | transmembrane protein 39A                                                |
| 241385_at   | 4.28  | up   | 210.64 | 48.00  | LARP7     | La ribonucleoprotein domain family, member 7                             |
| 241420_at   | 2.52  | down | 91.76  | 225.38 |           |                                                                          |
| 241433_at   | 2.13  | up   | 242.94 | 111.30 | RCOR3     | REST corepressor 3                                                       |
| 241443_at   | 3.59  | down | 38.99  | 136.60 |           |                                                                          |
| 241467_at   | 2.08  | up   | 275.16 | 128.87 |           |                                                                          |
| 241561_at   | 5.81  | down | 21.21  | 120.19 |           |                                                                          |
| 241620_at   | 2.33  | down | 91.19  | 207.48 | SMCHD1    | structural maintenance of chromosomes flexible hinge domain containing 1 |
| 241635_at   | 27.32 | down | 4.90   | 130.53 |           |                                                                          |
| 241639_at   | 5.13  | up   | 135.18 | 25.70  |           |                                                                          |
| 241675_s_at | 4.66  | up   | 114.90 | 24.03  |           |                                                                          |
| 241689_at   | 2.97  | down | 96.49  | 279.70 |           |                                                                          |
| 241696_at   | 2.96  | down | 118.60 | 342.42 | CNTLN     | centlein, centrosomal protein                                            |
| 241700_at   | 8.40  | down | 10.38  | 85.00  | ZFHX4     | zinc finger homeobox 4                                                   |
| 241704_x_at | 3.48  | down | 68.86  | 233.51 | ZNF320    | zinc finger protein 320                                                  |
| 241754_at   | 10.46 | down | 22.26  | 227.07 | C9orf126  | chromosome 9 open reading frame 126                                      |
| 241757_x_at | 2.57  | down | 63.81  | 159.80 | DYNC2LI1  | dynein, cytoplasmic 2, light intermediate chain 1                        |
| 241770_x_at | 2.25  | down | 43.66  | 95.70  |           |                                                                          |
| 241785_at   | 2.76  | up   | 224.65 | 79.37  |           |                                                                          |
| 241799_x_at | 3.46  | up   | 387.09 | 109.10 |           |                                                                          |
| 241801_at   | 4.81  | up   | 203.59 | 41.31  | PGAP1     | post-GPI attachment to proteins 1                                        |
| 241812_at   | 5.67  | up   | 163.71 | 28.15  | LOC26010  | viral DNA polymerase-transactivated protein 6                            |
| 241816_at   | 2.03  | down | 129.70 | 257.10 | C14orf106 | Chromosome 14 open reading frame 106                                     |
| 241847_at   | 31.62 | down | 4.90   | 151.12 |           |                                                                          |

|             |       |      |        |        |           |                                                          |
|-------------|-------|------|--------|--------|-----------|----------------------------------------------------------|
| 241873_at   | 29.64 | up   | 83.09  | 2.73   |           |                                                          |
| 241898_at   | 25.23 | up   | 184.84 | 7.14   |           |                                                          |
| 241913_at   | 4.09  | down | 41.34  | 165.03 |           |                                                          |
| 241935_at   | 2.40  | up   | 599.97 | 243.64 | SHROOM1   | shroom family member 1                                   |
| 241975_at   | 2.93  | down | 28.97  | 82.63  | LOC399959 | Hypothetical gene supported by BX647608                  |
| 242001_at   | 3.92  | up   | 162.85 | 40.49  | IDH1      | Isocitrate dehydrogenase 1 (NADP+), soluble              |
| 242019_at   | 5.46  | up   | 233.81 | 41.74  | LASS6     | LAG1 homolog, ceramide synthase 6                        |
| 242032_at   | 2.72  | up   | 118.53 | 42.45  | KIDINS220 | kinase D-interacting substrate, 220kDa                   |
| 242054_s_at | 2.78  | down | 85.96  | 233.02 |           |                                                          |
| 242062_at   | 2.94  | down | 90.16  | 258.50 | SAMD8     | sterile alpha motif domain containing 8                  |
| 242081_at   | 2.48  | up   | 162.77 | 63.88  | ACAP1     | ArfGAP with coiled-coil, ankyrin repeat and PH domains 1 |
| 242090_x_at | 2.59  | down | 56.35  | 142.03 |           |                                                          |
| 242116_x_at | 2.67  | down | 33.33  | 86.65  |           |                                                          |
| 242124_at   | 3.42  | down | 65.51  | 218.55 |           |                                                          |
| 242129_at   | 2.03  | down | 133.54 | 264.21 | SIN3B     | SIN3 homolog B, transcription regulator (yeast)          |
| 242142_at   | 2.53  | down | 99.34  | 245.28 |           |                                                          |
| 242152_at   | 17.61 | down | 11.53  | 198.05 |           |                                                          |
| 242212_at   | 45.97 | up   | 158.77 | 3.37   | RGS16     | regulator of G-protein signaling 16                      |
| 242223_at   | 2.08  | down | 73.28  | 148.97 |           |                                                          |
| 242234_at   | 2.47  | down | 65.21  | 157.12 | XAF1      | XIAP associated factor 1                                 |
| 242239_at   | 2.96  | down | 58.19  | 167.77 |           |                                                          |
| 242257_at   | 8.62  | up   | 121.22 | 13.71  |           |                                                          |
| 242287_at   | 2.87  | down | 128.33 | 358.79 | CLIP1     | CAP-GLY domain containing linker protein 1               |
| 242300_at   | 2.15  | up   | 339.35 | 153.94 |           |                                                          |
| 242304_at   | 2.05  | up   | 589.86 | 280.30 | WIBG      | within bgcn homolog (Drosophila)                         |

|             |       |      |        |        |           |                                                                                            |
|-------------|-------|------|--------|--------|-----------|--------------------------------------------------------------------------------------------|
| 242305_at   | 2.08  | down | 103.99 | 210.60 | LOC645513 | hypothetical LOC645513                                                                     |
| 242326_at   | 7.00  | up   | 199.98 | 27.85  | DC1001341 | (similar to collagen, type XXII, alpha 1                                                   |
| 242343_x_at | 2.65  | down | 147.45 | 380.96 |           |                                                                                            |
| 242368_at   | 13.62 | down | 12.01  | 159.49 |           |                                                                                            |
| 242369_x_at | 3.20  | down | 113.18 | 353.11 |           |                                                                                            |
| 242394_at   | 2.04  | down | 122.06 | 242.20 | CNKSR3    | CNKSR family member 3                                                                      |
| 242423_x_at | 19.67 | down | 10.80  | 207.04 |           |                                                                                            |
| 242439_s_at | 2.18  | up   | 407.68 | 182.68 | ASXL1     | additional sex combs like 1 (Drosophila)                                                   |
| 242468_at   | 3.39  | up   | 121.50 | 34.90  |           |                                                                                            |
| 242475_at   | 2.56  | down | 48.42  | 120.73 |           |                                                                                            |
| 242478_at   | 3.82  | down | 48.18  | 179.43 | GSTA1     | glutathione S-transferase alpha 1                                                          |
| 242480_at   | 7.21  | up   | 218.62 | 29.56  |           |                                                                                            |
| 242482_at   | 6.57  | up   | 114.81 | 17.03  | PRKAR1A   | protein kinase, cAMP-dependent, regulatory, type I, alpha (tissue specific extinguisher 1) |
| 242487_at   | 2.49  | up   | 200.33 | 78.46  | CC2D1B    | coiled-coil and C2 domain containing 1B                                                    |
| 242509_at   | 2.78  | down | 100.56 | 272.48 |           |                                                                                            |
| 242511_at   | 2.25  | up   | 277.85 | 120.63 |           |                                                                                            |
| 242517_at   | 5.63  | down | 172.42 | 946.47 | KISS1R    | KISS1 receptor                                                                             |
| 242572_at   | 16.15 | down | 10.33  | 162.65 |           |                                                                                            |
| 242618_at   | 2.61  | up   | 252.16 | 94.07  | HCG18     | HLA complex group 18                                                                       |
| 242621_at   | 2.39  | up   | 357.56 | 145.63 | ZNF498    | zinc finger protein 498                                                                    |
| 242640_at   | 3.31  | up   | 309.67 | 91.15  | C19orf55  | chromosome 19 open reading frame 55                                                        |
| 242650_at   | 5.93  | down | 18.91  | 109.35 |           |                                                                                            |
| 242654_at   | 2.53  | up   | 130.63 | 50.44  | FANCC     | Fanconi anemia, complementation group C                                                    |
| 242656_at   | 14.07 | down | 12.53  | 171.89 | GTF2H1    | General transcription factor IIH, polypeptide 1, 62kDa                                     |
| 242671_at   | 2.92  | down | 272.43 | 776.62 |           |                                                                                            |
| 242685_at   | 14.13 | up   | 135.57 | 9.36   | GTPBP8    | GTP-binding protein 8 (putative)                                                           |

|             |       |      |        |         |           |                                                        |
|-------------|-------|------|--------|---------|-----------|--------------------------------------------------------|
| 242737_at   | 2.07  | down | 114.82 | 231.51  |           |                                                        |
| 242762_s_at | 2.62  | down | 435.02 | 1111.02 | FAM171B   | family with sequence similarity 171, member B          |
| 242819_at   | 22.28 | up   | 162.86 | 7.13    |           |                                                        |
| 242854_x_at | 3.04  | up   | 225.10 | 72.26   | DLEU2     | deleted in lymphocytic leukemia 2 (non-protein coding) |
| 242858_at   | 2.65  | down | 118.51 | 306.66  |           |                                                        |
| 242865_at   | 20.07 | up   | 168.89 | 8.20    |           |                                                        |
| 242889_x_at | 5.95  | up   | 362.02 | 59.31   | LOC645431 | hypothetical LOC645431                                 |
| 242899_at   | 5.06  | up   | 165.75 | 31.92   |           |                                                        |
| 242915_at   | 2.84  | down | 120.78 | 333.94  | ZNF682    | zinc finger protein 682                                |
| 242916_at   | 3.01  | down | 74.70  | 219.10  | CEP110    | centrosomal protein 110kDa                             |
| 242937_at   | 3.39  | down | 69.32  | 229.22  | FOXK2     | forkhead box K2                                        |
| 242948_x_at | 3.86  | up   | 114.60 | 28.92   |           |                                                        |
| 242966_x_at | 2.08  | down | 50.35  | 102.13  |           |                                                        |
| 242990_at   | 2.40  | up   | 304.87 | 123.72  |           |                                                        |
| 243009_at   | 2.11  | up   | 201.78 | 93.21   | LOC441242 | Hypothetical LOC441242                                 |
| 243023_at   | 2.05  | up   | 322.45 | 152.99  |           |                                                        |
| 243038_at   | 3.66  | down | 29.30  | 104.51  | RBM43     | RNA binding motif protein 43                           |
| 243042_at   | 3.43  | down | 94.48  | 316.25  | FAM73A    | family with sequence similarity 73, member A           |
| 243051_at   | 5.83  | down | 37.79  | 214.89  | CNIH4     | Cornichon homolog 4 (Drosophila)                       |
| 243055_at   | 7.34  | up   | 173.17 | 22.99   |           |                                                        |
| 243057_at   | 2.32  | up   | 94.86  | 39.81   |           |                                                        |
| 243071_at   | 2.97  | up   | 608.91 | 199.98  |           |                                                        |
| 243093_at   | 2.07  | down | 90.31  | 182.33  | C2orf49   | chromosome 2 open reading frame 49                     |
| 243115_at   | 7.06  | up   | 142.01 | 19.62   |           |                                                        |
| 243128_at   | 8.81  | down | 13.48  | 115.78  | ZNF175    | zinc finger protein 175                                |
| 243137_at   | 5.63  | down | 24.85  | 136.39  |           |                                                        |
| 243184_at   | 2.36  | up   | 182.21 | 75.40   |           |                                                        |
| 243219_x_at | 2.16  | down | 65.27  | 137.59  | MRPL50    | Mitochondrial ribosomal protein L50                    |
| 243233_at   | 12.25 | down | 11.69  | 139.62  |           |                                                        |

|             |       |      |        |        |                                                                   |
|-------------|-------|------|--------|--------|-------------------------------------------------------------------|
| 243275_at   | 9.21  | down | 18.33  | 164.51 |                                                                   |
| 243304_at   | 2.12  | down | 58.91  | 121.68 | LOC286109 hypothetical protein LOC286109                          |
| 243345_at   | 2.04  | down | 54.16  | 107.86 |                                                                   |
| 243403_x_at | 3.07  | down | 52.15  | 156.05 | CPM carboxypeptidase M                                            |
| 243412_at   | 3.14  | up   | 123.03 | 38.15  | LOC731852 hypothetical LOC731852                                  |
| 243424_at   | 2.85  | down | 51.11  | 141.92 |                                                                   |
| 243431_at   | 2.07  | down | 217.34 | 438.80 |                                                                   |
| 243442_x_at | 5.82  | up   | 305.38 | 51.20  |                                                                   |
| 243512_x_at | 2.20  | up   | 292.44 | 129.84 |                                                                   |
| 243513_at   | 2.52  | down | 68.35  | 167.79 |                                                                   |
| 243553_x_at | 4.24  | down | 28.13  | 116.14 |                                                                   |
| 243560_at   | 2.56  | up   | 249.81 | 94.98  |                                                                   |
| 243570_at   | 2.21  | up   | 146.20 | 64.45  | SPCS2 signal peptidase complex subunit 2 homolog (S. cerevisiae)  |
| 243576_at   | 5.91  | up   | 156.43 | 25.81  |                                                                   |
| 243591_at   | 2.74  | down | 94.60  | 252.42 |                                                                   |
| 243673_at   | 4.38  | up   | 213.24 | 47.50  |                                                                   |
| 243760_at   | 3.07  | down | 40.45  | 121.13 | LOC650794 similar to FRAS1 related extracellular matrix protein 2 |
| 243765_at   | 2.25  | down | 59.98  | 131.57 |                                                                   |
| 243775_at   | 3.38  | down | 23.54  | 77.51  |                                                                   |
| 243783_at   | 2.38  | up   | 150.71 | 61.70  |                                                                   |
| 243791_at   | 2.17  | up   | 146.53 | 65.82  |                                                                   |
| 243808_at   | 5.90  | down | 12.72  | 73.21  |                                                                   |
| 243814_at   | 2.48  | up   | 298.19 | 117.07 | ZMYND8 Zinc finger, MYND-type containing 8                        |
| 243821_at   | 7.30  | down | 23.09  | 164.33 | MRPS31 mitochondrial ribosomal protein S31                        |
| 243828_at   | 6.96  | up   | 118.86 | 16.64  |                                                                   |
| 243844_at   | 3.14  | down | 42.82  | 130.93 |                                                                   |
| 243861_at   | 2.27  | down | 86.24  | 191.10 |                                                                   |
| 243868_at   | 16.29 | down | 10.67  | 169.44 |                                                                   |
| 243876_at   | 7.04  | up   | 176.06 | 24.39  |                                                                   |
| 243902_at   | 18.83 | up   | 201.07 | 10.41  |                                                                   |



|             |       |      |        |        |             |                                                                                |
|-------------|-------|------|--------|--------|-------------|--------------------------------------------------------------------------------|
| 243912_x_at | 3.19  | up   | 353.91 | 108.33 | APOBEC3F    | apolipoprotein B mRNA editing enzyme, catalytic polypeptide-like 3F            |
| 243947_s_at | 2.27  | up   | 211.04 | 90.45  |             |                                                                                |
| 243981_at   | 11.26 | down | 20.95  | 229.90 | STK4        | serine                                                                         |
| 244038_at   | 2.94  | up   | 480.03 | 159.13 | WDR89       | WD repeat domain 89                                                            |
| 244058_at   | 2.00  | up   | 117.68 | 57.34  | C10orf72    | chromosome 10 open reading frame 72                                            |
| 244079_at   | 28.64 | up   | 123.77 | 4.21   | LOC10012931 | Leucine-rich repeat-containing protein ENSP00000371558                         |
| 244091_at   | 24.04 | up   | 104.71 | 4.25   |             |                                                                                |
| 244121_at   | 2.88  | down | 36.32  | 102.07 | UBR3        | Ubiquitin protein ligase E3 component n-recognin 3 (putative)                  |
| 244225_x_at | 2.07  | up   | 134.99 | 63.63  | LMNA        | Lamin A                                                                        |
| 244226_s_at | 26.22 | up   | 113.16 | 4.21   |             |                                                                                |
| 244233_at   | 14.10 | up   | 152.14 | 10.52  | C18orf10    | chromosome 18 open reading frame 10                                            |
| 244257_at   | 2.06  | up   | 233.18 | 110.49 |             |                                                                                |
| 244258_at   | 2.99  | down | 56.98  | 166.29 |             |                                                                                |
| 244285_at   | 2.36  | up   | 313.25 | 129.34 |             |                                                                                |
| 244290_at   | 4.61  | down | 50.43  | 226.60 |             |                                                                                |
| 244310_at   | 2.26  | up   | 176.42 | 76.27  |             |                                                                                |
| 244320_at   | 2.15  | down | 85.02  | 178.21 | NHLRC2      | NHL repeat containing 2                                                        |
| 244360_at   | 3.69  | down | 105.13 | 377.97 | FBXL17      | F-box and leucine-rich repeat protein 17                                       |
| 244419_at   | 3.62  | down | 40.82  | 144.08 | FRZB        | Frizzled-related protein                                                       |
| 244427_at   | 5.62  | up   | 181.67 | 31.50  | KIF23       | Kinesin family member 23                                                       |
| 244448_at   | 2.98  | up   | 227.89 | 74.50  | TMEM17      | Transmembrane protein 17                                                       |
| 244459_at   | 14.37 | down | 10.80  | 151.33 |             |                                                                                |
| 244471_x_at | 2.28  | up   | 204.09 | 87.25  | PANX2       | Pannexin 2                                                                     |
| 244481_at   | 10.55 | up   | 151.23 | 13.98  | SLC25A24    | Solute carrier family 25 (mitochondrial carrier; phosphate carrier), member 24 |
| 244483_at   | 4.69  | up   | 138.92 | 28.88  |             |                                                                                |

|              |       |      |        |        |          |                                                        |
|--------------|-------|------|--------|--------|----------|--------------------------------------------------------|
| 244511_at    | 2.16  | up   | 157.38 | 71.07  |          |                                                        |
| 244512_at    | 11.66 | down | 15.28  | 173.69 |          |                                                        |
| 244517_x_at  | 3.13  | up   | 118.02 | 36.71  |          |                                                        |
| 244537_at    | 2.38  | up   | 245.21 | 100.32 |          |                                                        |
| 244550_at    | 2.05  | down | 104.88 | 209.75 |          |                                                        |
| 244560_at    | 22.78 | up   | 155.41 | 6.65   |          |                                                        |
| 244589_at    | 10.29 | up   | 104.42 | 9.89   |          |                                                        |
| 244646_at    | 2.46  | up   | 312.80 | 123.97 |          |                                                        |
| 244688_at    | 3.75  | up   | 198.53 | 51.68  |          |                                                        |
| 244700_at    | 2.57  | down | 81.77  | 204.68 | SEC61B   | Sec61 beta subunit                                     |
| 244703_x_at  | 2.46  | up   | 326.79 | 129.77 | IPO9     | importin 9                                             |
| 244716_x_at  | 2.53  | up   | 312.14 | 120.06 | TMIGD2   | transmembrane and immunoglobulin domain containing 2   |
| 244733_at    | 2.04  | down | 75.43  | 150.11 |          |                                                        |
| 244738_at    | 2.45  | up   | 280.90 | 111.92 | BRWD3    | bromodomain and WD repeat domain containing 3          |
| 244764_at    | 5.32  | down | 33.56  | 174.14 |          |                                                        |
| 244774_at    | 4.61  | down | 35.10  | 157.90 | PHACTR2  | phosphatase and actin regulator 2                      |
| 244777_at    | 3.94  | down | 114.14 | 438.55 | DCP2     | DCP2 decapping enzyme homolog (S. cerevisiae)          |
| 244783_at    | 4.05  | up   | 198.17 | 47.74  | YAF2     | YY1 associated factor 2                                |
| 244834_at    | 2.17  | down | 155.54 | 329.68 | C1orf134 | chromosome 1 open reading frame 134                    |
| 244856_at    | 12.18 | down | 13.16  | 156.30 |          |                                                        |
| 244864_at    | 2.92  | up   | 251.16 | 83.87  |          |                                                        |
| 244878_at    | 7.91  | up   | 138.80 | 17.11  |          |                                                        |
| 1552263_at   | 2.05  | down | 205.29 | 409.70 | MAPK1    | mitogen-activated protein kinase 1                     |
| 1552272_a_at | 2.38  | up   | 327.10 | 133.93 | MGC24975 | hypothetical protein MGC24975                          |
| 1552274_at   | 2.07  | down | 134.42 | 270.81 | PXK      | PX domain containing serine                            |
| 1552295_a_at | 2.02  | up   | 378.32 | 182.86 | SLC39A13 | solute carrier family 39 (zinc transporter), member 13 |
| 1552314_a_at | 2.38  | down | 149.10 | 345.76 | EYA3     | eyes absent homolog 3 (Drosophila)                     |

|              |       |      |        |        |           |                                                                          |
|--------------|-------|------|--------|--------|-----------|--------------------------------------------------------------------------|
| 1552408_at   | 16.95 | up   | 121.53 | 6.99   | ODF4      | outer dense fiber of sperm tails 4                                       |
| 1552430_at   | 2.33  | down | 53.42  | 121.25 | WDR17     | WD repeat domain 17                                                      |
| 1552497_a_at | 3.64  | up   | 260.74 | 69.82  | SLAMF6    | SLAM family member 6                                                     |
| 1552498_at   | 13.41 | up   | 242.96 | 17.67  | ZSCAN20   | zinc finger and SCAN domain containing 20                                |
| 1552501_a_at | 4.71  | up   | 319.62 | 66.16  | GPBAR1    | G protein-coupled bile acid receptor 1                                   |
| 1552509_a_at | 2.55  | down | 80.28  | 199.74 | CD300LG   | CD300 molecule-like family member g                                      |
| 1552557_a_at | 2.55  | up   | 182.08 | 69.61  | ZDHHC15   | zinc finger, DHHC-type containing 15                                     |
| 1552570_at   | 2.36  | down | 97.87  | 225.17 | C21orf29  | chromosome 21 open reading frame 29                                      |
| 1552612_at   | 2.41  | up   | 926.17 | 375.32 | CDC42SE2  | CDC42 small effector 2                                                   |
| 1552670_a_at | 6.29  | up   | 263.02 | 40.76  | PPP1R3B   | protein phosphatase 1, regulatory (inhibitor) subunit 3B                 |
| 1554579_a_at | 2.55  | up   | 141.93 | 54.30  | MYO18B    | myosin XVIIIIB                                                           |
| 1555598_a_at | 2.07  | up   | 146.38 | 68.84  | DUSP19    | dual specificity phosphatase 19                                          |
| 1552761_at   | 15.43 | up   | 198.61 | 12.55  | SLC16A11  | solute carrier family 16, member 11 (monocarboxylic acid transporter 11) |
| 1552769_at   | 2.05  | down | 98.99  | 197.50 | ZNF625    | zinc finger protein 625                                                  |
| 1552829_at   | 3.11  | up   | 192.91 | 60.51  |           |                                                                          |
| 1552952_at   | 13.77 | up   | 134.03 | 9.49   | RBMV2FP   | RNA binding motif protein, Y-linked, family 2, member F pseudogene       |
| 1553080_at   | 35.61 | up   | 149.02 | 4.08   | CSN1S2A   | casein alpha s2-like A                                                   |
| 1553088_a_at | 2.01  | down | 175.86 | 343.96 | BCL2L11   | BCL2-like 11 (apoptosis facilitator)                                     |
| 1553102_a_at | 9.42  | up   | 179.19 | 18.56  | CCDC69    | coiled-coil domain containing 69                                         |
| 1553192_at   | 3.04  | down | 57.79  | 171.16 | ZNF441    | zinc finger protein 441                                                  |
| 1553204_at   | 5.83  | down | 28.93  | 164.31 | C20orf200 | chromosome 20 open reading frame 200                                     |

|              |       |      |         |         |           |                                                            |
|--------------|-------|------|---------|---------|-----------|------------------------------------------------------------|
| 1553440_at   | 24.55 | down | 2.66    | 63.62   | C18orf16  | chromosome 18 open reading frame 16                        |
| 1553446_at   | 28.34 | up   | 97.10   | 3.34    | FLJ37396  | hypothetical protein FLJ37396                              |
| 1555565_s_at | 2.21  | down | 151.09  | 326.17  | TAPBP     | TAP binding protein (tapasin)                              |
| 1553587_a_at | 2.05  | up   | 662.17  | 315.48  | POLE4     | polymerase (DNA-directed), epsilon 4 (p12 subunit)         |
| 1553601_a_at | 6.90  | up   | 111.42  | 15.75   | TMIE      | transmembrane inner ear                                    |
| 1553644_at   | 2.59  | up   | 158.73  | 59.81   | C14orf49  | chromosome 14 open reading frame 49                        |
| 1553658_at   | 3.08  | down | 73.40   | 220.09  | LOC150197 | hypothetical LOC150197                                     |
| 1554093_a_at | 2.07  | down | 1281.29 | 2591.35 | SNAPC5    | small nuclear RNA activating complex, polypeptide 5, 19kDa |
| 1553679_s_at | 2.45  | down | 197.24  | 471.37  | VKORC1L1  | vitamin K epoxide reductase complex, subunit 1-like 1      |
| 1553686_at   | 2.23  | up   | 242.11  | 105.95  | C18orf25  | chromosome 18 open reading frame 25                        |
| 1553696_s_at | 2.61  | up   | 557.02  | 208.30  | ZNF569    | zinc finger protein 569                                    |
| 1553725_s_at | 3.24  | up   | 877.26  | 264.07  | ZNF644    | zinc finger protein 644                                    |
| 1553768_a_at | 2.44  | down | 78.37   | 186.35  | DCBLD1    | discoidin, CUB and LCCL domain containing 1                |
| 1564439_a_at | 5.47  | up   | 261.28  | 46.58   | C11orf36  | chromosome 11 open reading frame 36                        |
| 1553991_s_at | 2.05  | down | 260.77  | 520.30  | FLJ20674  | hypothetical protein FLJ20674                              |
| 1554014_at   | 3.08  | down | 195.55  | 588.06  | CHD2      | chromodomain helicase DNA binding protein 2                |
| 1554020_at   | 2.26  | down | 262.09  | 578.32  | BICD1     | bicaudal D homolog 1 (Drosophila)                          |
| 1556283_s_at | 2.16  | down | 342.59  | 722.71  | FGFR1OP2  | FGFR1 oncogene partner 2                                   |
| 1554077_a_at | 2.11  | up   | 359.36  | 165.74  | TMEM53    | transmembrane protein 53                                   |

|              |       |      |         |        |           |                                                                     |
|--------------|-------|------|---------|--------|-----------|---------------------------------------------------------------------|
| 1554091_a_at | 2.52  | down | 189.07  | 465.06 | TIRAP     | toll-interleukin 1 receptor (TIR) domain containing adaptor protein |
| 1554122_a_at | 2.93  | up   | 261.36  | 86.85  | HSD17B12  | hydroxysteroid (17-beta) dehydrogenase 12                           |
| 1554140_at   | 2.29  | up   | 139.09  | 59.23  | WDR78     | WD repeat domain 78                                                 |
| 1554202_x_at | 5.01  | up   | 215.74  | 41.99  | CABP4     | calcium binding protein 4                                           |
| 1554217_a_at | 2.01  | down | 60.63   | 118.58 | CCDC132   | coiled-coil domain containing 132                                   |
| 1554253_a_at | 2.38  | down | 119.11  | 276.24 | LASS3     | LAG1 homolog, ceramide synthase 3                                   |
| 1554292_a_at | 2.48  | up   | 325.42  | 127.97 | UHRF1BP1L | UHRF1 binding protein 1-like                                        |
| 1554400_at   | 5.57  | up   | 166.91  | 29.24  | TCTE3     | t-complex-associated-testis-expressed 3                             |
| 1554410_a_at | 2.10  | up   | 1195.10 | 556.06 | WBSCR16   | Williams-Beuren syndrome chromosome region 16                       |
| 1554432_x_at | 2.70  | up   | 740.17  | 267.38 | FAM165B   | family with sequence similarity 165, member B                       |
| 1554449_at   | 5.72  | up   | 201.00  | 34.26  | MIER3     | mesoderm induction early response 1, family member 3                |
| 1554464_a_at | 2.80  | down | 310.10  | 847.25 | CRTAP     | cartilage associated protein                                        |
| 1554470_s_at | 2.05  | down | 196.62  | 392.97 | ZBTB44    | zinc finger and BTB domain containing 44                            |
| 1554506_x_at | 2.48  | up   | 115.53  | 45.46  | NAALAD2   | N-acetylated alpha-linked acidic dipeptidase 2                      |
| 1554512_a_at | 3.98  | down | 26.56   | 102.95 | CCDC123   | coiled-coil domain containing 123                                   |
| 1554642_at   | 6.29  | up   | 236.15  | 36.61  | RNF32     | ring finger protein 32                                              |
| 1554672_at   | 14.42 | up   | 178.81  | 12.09  | TTC26     | tetratricopeptide repeat domain 26                                  |
| 1554755_a_at | 2.21  | down | 62.71   | 135.37 | KIAA0774  | KIAA0774                                                            |

|              |       |      |        |        |           |                                                                                   |
|--------------|-------|------|--------|--------|-----------|-----------------------------------------------------------------------------------|
| 1554757_a_at | 3.88  | up   | 381.89 | 95.89  | INPP5A    | inositol polyphosphate-5-phosphatase, 40kDa                                       |
| 1554778_at   | 22.58 | down | 3.37   | 74.09  | PHLDB2    | pleckstrin homology-like domain, family B, member 2                               |
| 1554786_at   | 63.49 | up   | 183.75 | 2.82   | CASS4     | Cas scaffolding protein family member 4                                           |
| 1554804_a_at | 2.16  | up   | 602.53 | 272.51 | CLDN19    | claudin 19                                                                        |
| 1554826_at   | 2.39  | down | 80.77  | 188.12 | PFTK2     | PFTAIRE protein kinase 2                                                          |
| 1554835_a_at | 8.94  | up   | 255.45 | 27.87  | B3GNT5    | UDP-GlcNAc:betaGal beta-1,3-N-acetylglucosaminyltransferase 5                     |
| 1554844_at   | 4.26  | up   | 107.23 | 24.53  | EYA3      | eyes absent homolog 3 (Drosophila)                                                |
| 1554875_at   | 2.25  | up   | 194.91 | 84.32  | C2orf34   | chromosome 2 open reading frame 34                                                |
| 1554887_at   | 2.09  | down | 137.10 | 279.68 |           |                                                                                   |
| 1554921_a_at | 5.56  | up   | 209.09 | 36.68  | SCEL      | sciellin                                                                          |
| 1554983_at   | 7.87  | down | 17.90  | 137.40 | C21orf117 | chromosome 21 open reading frame 117                                              |
| 1554985_at   | 38.13 | down | 4.41   | 163.98 | ZNF396    | zinc finger protein 396                                                           |
| 1555021_a_at | 2.36  | up   | 161.59 | 66.82  | SCARF1    | scavenger receptor class F, member 1                                              |
| 1555027_at   | 14.15 | up   | 110.27 | 7.60   |           |                                                                                   |
| 1555057_at   | 29.39 | up   | 150.70 | 5.00   | NDUFS4    | NADH dehydrogenase (ubiquinone) Fe-S protein 4, 18kDa (NADH-coenzyme Q reductase) |
| 1555071_at   | 17.91 | up   | 131.53 | 7.16   | TLL1      | tolloid-like 1                                                                    |
| 1555122_at   | 4.86  | down | 36.21  | 171.75 | GPR125    | G protein-coupled receptor 125                                                    |
| 1555123_at   | 2.56  | up   | 162.31 | 61.75  | ST6GAL2   | ST6 beta-galactosamide alpha-2,6-sialyltransferase 2                              |
| 1555137_a_at | 2.90  | down | 43.62  | 123.29 | FGD6      | FYVE, RhoGEF and PH domain containing 6                                           |
| 1555216_a_at | 3.31  | down | 289.99 | 937.11 | LOC645722 | hypothetical LOC645722                                                            |

|              |       |      |        |         |        |                                                                                |
|--------------|-------|------|--------|---------|--------|--------------------------------------------------------------------------------|
| 1555240_s_at | 2.16  | down | 306.98 | 646.61  | GNG12  | guanine nucleotide binding protein (G protein), gamma 12                       |
| 1555288_s_at | 2.17  | down | 170.25 | 360.29  | FBF1   | Fas (TNFRSF6) binding factor 1                                                 |
| 1555289_at   | 2.14  | down | 116.29 | 242.15  | SEC16B | SEC16 homolog B ( <i>S. cerevisiae</i> )                                       |
| 1555306_a_at | 3.71  | down | 39.70  | 143.70  | ECE2   | endothelin converting enzyme 2                                                 |
| 1555341_at   | 64.12 | up   | 139.65 | 2.12    | UNC5C  | unc-5 homolog C ( <i>C. elegans</i> )                                          |
| 1555368_x_at | 2.53  | up   | 209.90 | 81.02   | ZNF479 | zinc finger protein 479                                                        |
| 1555373_at   | 2.76  | up   | 124.38 | 44.00   |        |                                                                                |
| 1555374_at   | 3.93  | down | 101.84 | 390.53  |        |                                                                                |
| 1555384_a_at | 2.40  | up   | 446.25 | 181.14  | LARP4  | La ribonucleoprotein domain family, member 4                                   |
| 1555388_s_at | 2.20  | up   | 397.54 | 176.45  | SNX25  | sorting nexin 25                                                               |
| 1555408_at   | 2.31  | down | 158.76 | 357.60  | BAGE2  | B melanoma antigen family, member 2                                            |
| 1555409_a_at | 2.05  | down | 151.95 | 303.17  | BAGE2  | B melanoma antigen family, member 2                                            |
| 1555413_s_at | 9.84  | down | 16.11  | 154.48  | FBXL21 | F-box and leucine-rich repeat protein 21                                       |
| 1555437_at   | 2.66  | down | 55.95  | 145.24  | EARS2  | glutamyl-tRNA synthetase 2, mitochondrial (putative)                           |
| 1555469_a_at | 4.62  | up   | 358.31 | 75.61   | CLASP2 | cytoplasmic linker associated protein 2                                        |
| 1555643_s_at | 18.61 | down | 10.77  | 195.38  | LILRA5 | leukocyte immunoglobulin-like receptor, subfamily A (with TM domain), member 5 |
| 1555737_a_at | 2.46  | down | 85.92  | 206.06  | KLK4   | kallikrein-related peptidase 4                                                 |
| 1555731_a_at | 2.27  | down | 250.17 | 553.20  | AP1S3  | adaptor-related protein complex 1, sigma 3 subunit                             |
| 1555759_a_at | 2.64  | down | 702.38 | 1810.51 | CCL5   | chemokine (C-C motif) ligand 5                                                 |

|              |       |      |         |         |           |                                             |
|--------------|-------|------|---------|---------|-----------|---------------------------------------------|
| 1555772_a_at | 2.25  | up   | 206.65  | 89.49   | CDC25A    | cell division cycle 25 homolog A (S. pombe) |
| 1555775_a_at | 2.53  | up   | 306.33  | 118.22  | ZAR1      | zygote arrest 1                             |
| 1555778_a_at | 9.19  | down | 9.10    | 81.56   | POSTN     | periostin, osteoblast specific factor       |
| 1555808_a_at | 9.88  | down | 16.60   | 159.99  | EXD2      | exonuclease 3'-5' domain containing 2       |
| 1555843_at   | 2.04  | up   | 635.64  | 303.16  | HNRNPM    | Heterogeneous nuclear ribonucleoprotein M   |
| 1555872_a_at | 2.06  | up   | 249.48  | 118.16  | LOC728903 | hypothetical LOC728903                      |
| 1555889_a_at | 2.20  | down | 2266.89 | 4869.81 | CRTAP     | cartilage associated protein                |
| 1555932_at   | 25.81 | down | 3.44    | 86.63   | TSGA10    | Testis specific, 10                         |
| 1555978_s_at | 4.11  | down | 35.90   | 143.94  |           |                                             |
| 1556061_at   | 3.13  | up   | 703.80  | 219.44  | RPP30     | ribonuclease P                              |
| 1556063_s_at | 4.98  | up   | 285.40  | 55.89   | RPP30     | ribonuclease P                              |
| 1556144_at   | 2.38  | down | 107.56  | 249.96  | DHX30     | DEAH (Asp-Glu-Ala-His) box polypeptide 30   |
| 1556175_at   | 3.24  | up   | 161.59  | 48.68   | MTSS1L    | metastasis suppressor 1-like                |
| 1556187_at   | 19.15 | down | 5.53    | 103.22  |           |                                             |
| 1556236_at   | 5.43  | up   | 216.58  | 38.85   |           |                                             |
| 1556373_a_at | 6.12  | up   | 129.92  | 20.69   |           |                                             |
| 1556385_at   | 2.26  | up   | 321.85  | 138.62  |           |                                             |
| 1556499_s_at | 2.12  | up   | 516.34  | 237.33  | COL1A1    | collagen, type I, alpha 1                   |
| 1556545_at   | 3.71  | down | 52.21   | 188.64  |           |                                             |
| 1556568_a_at | 2.66  | up   | 294.32  | 107.71  |           |                                             |
| 1556588_at   | 3.18  | up   | 173.29  | 53.06   | C15orf37  | chromosome 15 open reading frame 37         |
| 1556595_at   | 2.23  | up   | 149.81  | 65.48   |           |                                             |
| 1556743_at   | 2.46  | down | 57.66   | 138.12  |           |                                             |
| 1556763_at   | 2.00  | down | 124.92  | 244.09  |           |                                             |
| 1556835_s_at | 5.74  | up   | 334.33  | 56.76   |           |                                             |
| 1556839_s_at | 3.10  | up   | 239.35  | 75.32   | SPTBN5    | Spectrin, beta, non-erythrocytic 5          |



|              |       |      |        |        |              |                                                                              |
|--------------|-------|------|--------|--------|--------------|------------------------------------------------------------------------------|
| 1556876_s_at | 7.60  | down | 13.16  | 97.48  | PIP1-64P12   | transmembrane phosphoinositide 3-phosphatase and tensin homolog 2 pseudogene |
| 1556889_s_at | 5.04  | down | 23.09  | 113.47 |              |                                                                              |
| 1557063_at   | 6.51  | up   | 186.30 | 27.91  | FLJ45244     | hypothetical locus FLJ45244                                                  |
| 1557064_s_at | 3.56  | down | 73.11  | 253.99 | HGSNAT       | heparan-alpha-glucosaminide N-acetyltransferase                              |
| 1557065_at   | 4.07  | up   | 385.76 | 92.38  | YLPM1        | YLP motif containing 1                                                       |
| 1557114_a_at | 6.07  | up   | 476.40 | 76.48  | LOC284385    | hypothetical protein LOC284385                                               |
| 1557121_s_at | 2.89  | up   | 222.22 | 74.86  |              |                                                                              |
| 1557133_at   | 3.44  | down | 31.45  | 105.52 | RP1-177G6.1  | hypothetical protein LOC286411                                               |
| 1557149_at   | 2.28  | down | 119.85 | 266.64 |              |                                                                              |
| 1557161_at   | 3.79  | down | 103.88 | 383.57 | LOC100132735 | hypothetical protein LOC100132735                                            |
| 1557181_s_at | 2.57  | up   | 448.70 | 169.89 | C11orf87     | chromosome 11 open reading frame 87                                          |
| 1557206_at   | 32.75 | down | 2.75   | 87.80  | FLJ35848     | hypothetical protein FLJ35848                                                |
| 1557219_at   | 12.28 | up   | 111.38 | 8.84   |              |                                                                              |
| 1557223_at   | 4.24  | down | 48.47  | 200.54 | RBPMS        | RNA binding protein with multiple splicing                                   |
| 1557394_at   | 9.42  | down | 19.15  | 175.82 | DLGAP4       | discs, large (Drosophila) homolog-associated protein 4                       |
| 1557400_at   | 2.07  | down | 86.18  | 173.89 |              |                                                                              |
| 1557403_s_at | 2.86  | up   | 211.73 | 72.19  |              |                                                                              |
| 1557459_at   | 2.95  | down | 41.98  | 120.87 |              |                                                                              |
| 1557487_at   | 2.03  | up   | 497.37 | 238.64 |              |                                                                              |
| 1557504_at   | 2.84  | up   | 116.12 | 39.93  |              |                                                                              |
| 1557515_at   | 28.03 | down | 3.39   | 92.64  |              |                                                                              |
| 1557540_at   | 3.81  | up   | 280.73 | 71.87  |              |                                                                              |
| 1557553_at   | 2.91  | down | 35.92  | 101.90 | PPP1R12B     | Protein phosphatase 1, regulatory (inhibitor) subunit 12B                    |
| 1557589_a_at | 2.02  | up   | 267.81 | 129.50 |              |                                                                              |

|              |       |      |        |         |           |                                                                                  |
|--------------|-------|------|--------|---------|-----------|----------------------------------------------------------------------------------|
| 1557609_s_at | 2.88  | down | 51.88  | 145.80  | TBC1D12   | TBC1 domain family, member 12                                                    |
| 1557613_at   | 6.11  | down | 58.54  | 348.52  | FLJ39534  | hypothetical FLJ39534                                                            |
| 1557714_at   | 2.15  | up   | 397.11 | 180.13  | CTBP1     | C-terminal binding protein 1                                                     |
| 1557717_at   | 15.35 | down | 8.52   | 127.54  | LOC338862 | hypothetical protein LOC338862                                                   |
| 1557737_s_at | 3.28  | up   | 151.06 | 44.95   | NKTR      | natural killer-tumor recognition sequence                                        |
| 1557738_at   | 7.83  | up   | 227.50 | 28.34   |           |                                                                                  |
| 1557751_at   | 3.29  | up   | 162.44 | 48.14   |           |                                                                                  |
| 1557805_at   | 6.08  | up   | 154.65 | 24.80   |           |                                                                                  |
| 1557838_at   | 2.60  | up   | 227.65 | 85.21   |           |                                                                                  |
| 1557873_at   | 24.36 | down | 12.67  | 301.03  |           |                                                                                  |
| 1558021_at   | 2.63  | down | 105.61 | 271.09  | RABEPK    | Rab9 effector protein with kelch motifs                                          |
| 1558044_s_at | 2.04  | down | 593.09 | 1182.51 | EXOSC6    | exosome component 6                                                              |
| 1558062_at   | 2.33  | up   | 178.46 | 74.63   | FBXO10    | F-box protein 10                                                                 |
| 1558117_s_at | 2.40  | up   | 289.60 | 117.51  | USP31     | ubiquitin specific peptidase 31                                                  |
| 1558136_s_at | 2.06  | down | 972.74 | 1949.64 | TAF11     | TAF11 RNA polymerase II, TATA box binding protein (TBP)-associated factor, 28kDa |
| 1558154_at   | 2.18  | down | 110.06 | 233.66  |           |                                                                                  |
| 1558277_at   | 4.11  | up   | 194.28 | 46.04   | ZNF740    | zinc finger protein 740                                                          |
| 1558402_at   | 4.47  | up   | 197.49 | 43.09   |           |                                                                                  |
| 1558463_s_at | 19.34 | up   | 382.27 | 19.27   | LOC650392 | Hypothetical protein LOC650392                                                   |
| 1558502_s_at | 2.16  | up   | 303.57 | 137.22  | DNM3      | dynamamin 3                                                                      |
| 1558517_s_at | 2.39  | up   | 201.44 | 82.10   | LRRC8C    | leucine rich repeat containing 8 family, member C                                |
| 1558533_at   | 2.28  | up   | 249.98 | 106.71  | KRBA2     | KRAB-A domain containing 2                                                       |
| 1558534_at   | 11.85 | up   | 211.67 | 17.41   | LOC440354 | PI-3-kinase-related kinase SMG-1 pseudogene                                      |
| 1558537_x_at | 2.23  | down | 77.78  | 168.90  | ZNF844    | zinc finger protein 844                                                          |
| 1558557_at   | 5.39  | up   | 94.00  | 17.01   | C16orf62  | chromosome 16 open reading frame 62                                              |

|              |       |      |        |        |           |                                                             |
|--------------|-------|------|--------|--------|-----------|-------------------------------------------------------------|
| 1558605_at   | 5.03  | up   | 232.06 | 44.94  |           |                                                             |
| 1558837_a_at | 2.02  | up   | 612.05 | 295.11 |           |                                                             |
| 1558948_a_at | 42.64 | down | 4.64   | 192.83 |           |                                                             |
| 1558977_at   | 5.33  | up   | 170.66 | 31.21  |           |                                                             |
| 1558987_at   | 2.17  | down | 83.13  | 176.09 |           |                                                             |
| 1559003_a_at | 2.24  | down | 139.51 | 305.31 | LOC126661 | hypothetical protein LOC126661                              |
| 1559036_at   | 2.03  | down | 64.34  | 127.35 | C4A       | complement component 4A (Rodgers blood group)               |
| 1559059_s_at | 13.18 | up   | 174.16 | 12.88  | ZNF611    | zinc finger protein 611                                     |
| 1559086_at   | 31.09 | up   | 157.28 | 4.93   |           |                                                             |
| 1559159_at   | 2.04  | up   | 206.27 | 98.56  | CEP68     | centrosomal protein 68kDa                                   |
| 1559161_at   | 4.30  | up   | 164.53 | 37.26  |           |                                                             |
| 1559244_at   | 3.67  | up   | 177.30 | 47.06  | FMN2      | formin 2                                                    |
| 1559265_at   | 2.10  | down | 151.98 | 311.60 | C10orf140 | chromosome 10 open reading frame 140                        |
| 1559315_s_at | 2.53  | up   | 201.92 | 77.97  | LOC144481 | hypothetical protein LOC144481                              |
| 1559332_at   | 2.77  | up   | 174.18 | 61.27  |           |                                                             |
| 1559412_at   | 7.62  | down | 17.39  | 129.27 | C21orf34  | chromosome 21 open reading frame 34                         |
| 1559495_at   | 2.60  | down | 112.61 | 285.53 |           |                                                             |
| 1559535_s_at | 10.64 | down | 8.38   | 86.97  |           |                                                             |
| 1559582_at   | 2.98  | up   | 283.65 | 92.71  | RHOQ      | ras homolog gene family, member Q                           |
| 1559640_at   | 2.37  | up   | 133.54 | 55.03  | ANKFN1    | Ankyrin-repeat and fibronectin type III domain containing 1 |
| 1559672_a_at | 23.37 | up   | 145.59 | 6.07   | C9orf93   | chromosome 9 open reading frame 93                          |
| 1559674_at   | 5.30  | up   | 236.67 | 43.58  | ZNF333    | zinc finger protein 333                                     |
| 1559723_s_at | 2.26  | down | 397.13 | 874.43 |           |                                                             |
| 1559762_at   | 7.99  | up   | 164.73 | 20.11  |           |                                                             |
| 1559766_at   | 4.75  | down | 45.45  | 210.41 |           |                                                             |
| 1559895_x_at | 2.83  | up   | 236.34 | 81.38  |           |                                                             |
| 1559940_s_at | 2.11  | down | 135.20 | 278.00 | KRT18P33  | Keratin 18 pseudogene 33                                    |
| 1559954_s_at | 2.15  | down | 348.34 | 728.76 | DDX42     | DEAD (Asp-Glu-Ala-Asp) box polypeptide 42                   |

|              |       |      |        |        |             |                                                                                    |
|--------------|-------|------|--------|--------|-------------|------------------------------------------------------------------------------------|
| 1559980_at   | 2.41  | up   | 159.81 | 64.72  | ZNF7        | zinc finger protein 7                                                              |
| 1560070_at   | 4.18  | down | 41.00  | 167.04 |             |                                                                                    |
| 1560102_at   | 43.46 | up   | 262.64 | 5.89   |             |                                                                                    |
| 1560222_at   | 18.76 | down | 6.28   | 114.86 |             |                                                                                    |
| 1560297_at   | 2.62  | up   | 457.48 | 169.93 |             |                                                                                    |
| 1560340_s_at | 2.05  | up   | 195.40 | 92.72  | RP9P        | retinitis pigmentosa 9 pseudogene                                                  |
| 1560353_at   | 15.63 | up   | 138.62 | 8.65   |             |                                                                                    |
| 1560370_x_at | 2.51  | down | 71.89  | 175.61 | ANKH        | Ankylosis, progressive homolog (mouse)                                             |
| 1560402_at   | 2.53  | up   | 324.89 | 125.30 | GAS5        | growth arrest-specific 5 (non-protein coding)                                      |
| 1560446_at   | 2.04  | down | 95.68  | 190.55 | LOC10013281 | hypothetical protein LOC100132815                                                  |
| 1560464_at   | 8.11  | down | 20.98  | 165.91 |             |                                                                                    |
| 1560491_at   | 2.90  | down | 49.35  | 139.46 |             |                                                                                    |
| 1560509_at   | 2.02  | up   | 359.98 | 173.76 |             |                                                                                    |
| 1560625_s_at | 2.54  | down | 123.34 | 305.83 |             |                                                                                    |
| 1560662_s_at | 2.49  | up   | 191.31 | 74.86  | WHAMML1     | WAS protein homolog associated with actin, golgi membranes and microtubules-like 1 |
| 1560747_at   | 2.73  | down | 33.50  | 89.17  |             |                                                                                    |
| 1560754_at   | 4.40  | up   | 199.38 | 44.15  | CMTM7       | CKLF-like MARVEL transmembrane domain containing 7                                 |
| 1560767_at   | 3.70  | down | 89.86  | 324.39 | HCG22       | HLA complex group 22                                                               |
| 1560887_a_at | 2.96  | down | 47.95  | 138.59 |             |                                                                                    |
| 1560962_at   | 7.83  | down | 7.35   | 56.07  |             |                                                                                    |
| 1560981_a_at | 2.39  | up   | 177.00 | 72.25  | PPARA       | peroxisome proliferator-activated receptor alpha                                   |
| 1561017_at   | 15.82 | up   | 150.91 | 9.30   |             |                                                                                    |
| 1561058_at   | 4.25  | up   | 115.13 | 26.43  |             |                                                                                    |
| 1561099_at   | 16.64 | down | 6.27   | 101.67 | FLJ32756    | hypothetical LOC642757                                                             |
| 1561106_at   | 11.04 | up   | 115.70 | 10.22  | C6orf217    | chromosome 6 open reading frame 217                                                |
| 1561136_at   | 31.71 | up   | 154.55 | 4.75   | GYPE        | glycophorin E                                                                      |

|              |       |      |        |        |                                                                                      |
|--------------|-------|------|--------|--------|--------------------------------------------------------------------------------------|
| 1561169_at   | 2.62  | down | 54.54  | 139.32 | LOC727818 similar to PRP38 pre-mRNA processing factor 38 (yeast) domain containing B |
| 1561206_at   | 3.04  | down | 59.61  | 176.66 | KLHL8 kelch-like 8 (Drosophila)                                                      |
| 1561208_at   | 2.01  | down | 90.60  | 177.29 | tcag7.1188 hypothetical LOC340340                                                    |
| 1561254_at   | 5.81  | up   | 77.64  | 13.02  |                                                                                      |
| 1561336_at   | 5.45  | down | 21.51  | 114.38 | DNASE1L3 deoxyribonuclease I-like 3                                                  |
| 1561360_at   | 2.72  | up   | 260.62 | 93.55  | LOC283914 hypothetical protein LOC283914                                             |
| 1561411_at   | 2.25  | up   | 239.68 | 103.84 |                                                                                      |
| 1561445_at   | 37.70 | up   | 79.61  | 2.06   |                                                                                      |
| 1561454_at   | 12.00 | up   | 133.74 | 10.86  |                                                                                      |
| 1561499_at   | 2.16  | down | 90.72  | 191.00 |                                                                                      |
| 1561518_at   | 2.81  | up   | 303.01 | 105.02 |                                                                                      |
| 1561633_at   | 2.67  | down | 119.07 | 309.44 |                                                                                      |
| 1561642_at   | 2.63  | up   | 153.08 | 56.67  | RECQL5 RecQ protein-like 5                                                           |
| 1561676_at   | 2.24  | down | 71.27  | 155.30 |                                                                                      |
| 1561690_at   | 54.89 | up   | 167.57 | 2.98   |                                                                                      |
| 1561702_at   | 16.29 | up   | 223.49 | 13.37  |                                                                                      |
| 1561720_at   | 4.72  | up   | 82.00  | 16.95  |                                                                                      |
| 1561754_at   | 22.57 | down | 6.94   | 152.84 |                                                                                      |
| 1561760_s_at | 4.24  | up   | 153.26 | 35.27  |                                                                                      |
| 1561813_at   | 2.60  | up   | 129.90 | 48.68  | SYTL3 synaptotagmin-like 3                                                           |
| 1561882_at   | 8.40  | up   | 150.35 | 17.45  |                                                                                      |
| 1561909_at   | 3.73  | down | 45.56  | 165.81 | CCND3 Cyclin D3                                                                      |
| 1562028_at   | 29.13 | up   | 199.20 | 6.67   |                                                                                      |
| 1562058_at   | 2.14  | down | 61.58  | 128.31 |                                                                                      |
| 1562081_a_at | 3.72  | down | 49.70  | 180.26 |                                                                                      |
| 1562106_at   | 4.13  | down | 39.42  | 158.69 |                                                                                      |
| 1562219_at   | 14.73 | up   | 278.26 | 18.41  | FLJ41649 Hypothetical LOC401260                                                      |
| 1562222_at   | 26.49 | up   | 179.69 | 6.61   | TEX9 testis expressed 9                                                              |
| 1562259_at   | 47.44 | up   | 156.94 | 3.23   |                                                                                      |
| 1562324_a_at | 2.05  | up   | 335.07 | 159.10 | UNK unkempt homolog (Drosophila)                                                     |
| 1562434_at   | 3.31  | down | 101.75 | 328.77 |                                                                                      |

|              |       |      |        |        |            |                                                     |
|--------------|-------|------|--------|--------|------------|-----------------------------------------------------|
| 1562443_at   | 4.55  | up   | 89.46  | 19.15  | RLBP1L2    | retinaldehyde binding protein 1-like 2              |
| 1562454_at   | 2.03  | down | 103.35 | 204.55 |            |                                                     |
| 1562456_at   | 6.83  | down | 17.76  | 118.30 |            |                                                     |
| 1562475_at   | 17.92 | up   | 115.53 | 6.29   | {FZp686O13 | hypothetical gene supported by BC043549; BX648102   |
| 1562595_at   | 3.16  | down | 38.11  | 117.34 |            |                                                     |
| 1562608_at   | 4.77  | down | 55.23  | 256.66 |            |                                                     |
| 1562611_at   | 2.40  | up   | 107.86 | 43.87  |            |                                                     |
| 1562681_at   | 2.56  | up   | 242.97 | 92.62  | LOC338651  | hypothetical protein LOC338651                      |
| 1562731_s_at | 3.47  | up   | 233.03 | 65.41  | MDS2       | myelodysplastic syndrome 2 translocation associated |
| 1562771_at   | 5.98  | up   | 202.31 | 33.00  |            |                                                     |
| 1562792_at   | 2.20  | down | 104.32 | 223.39 | NIPAL1     | NIPA-like domain containing 1                       |
| 1562815_at   | 2.76  | up   | 158.74 | 56.05  | EFCAB6     | EF-hand calcium binding domain 6                    |
| 1562849_at   | 20.52 | up   | 275.94 | 13.11  |            |                                                     |
| 1562898_at   | 2.93  | down | 57.73  | 165.14 |            |                                                     |
| 1562940_at   | 2.69  | up   | 171.49 | 62.15  |            |                                                     |
| 1562988_at   | 4.18  | down | 49.65  | 202.24 | ZNF397OS   | zinc finger protein 397 opposite strand             |
| 1563075_s_at | 6.76  | up   | 213.89 | 30.83  |            |                                                     |
| 1563117_at   | 15.93 | up   | 204.46 | 12.51  | LOC388456  | hypothetical gene supported by BC039671             |
| 1563228_x_at | 28.88 | down | 4.94   | 139.03 | SLC38A10   | solute carrier family 38, member 10                 |
| 1563318_s_at | 4.36  | up   | 207.21 | 46.34  | MAGIX      | MAGI family member, X-linked                        |
| 1563376_at   | 2.46  | up   | 138.33 | 54.72  |            |                                                     |
| 1563427_at   | 12.70 | down | 8.71   | 107.80 |            |                                                     |
| 1563497_at   | 2.84  | down | 119.06 | 329.24 | USP25      | ubiquitin specific peptidase 25                     |
| 1569106_s_at | 2.18  | up   | 389.75 | 174.21 | SETD5      | SET domain containing 5                             |

|              |       |      |        |         |           |                                                                    |
|--------------|-------|------|--------|---------|-----------|--------------------------------------------------------------------|
| 1563638_at   | 9.55  | down | 13.85  | 129.00  | FAM18A    | family with sequence similarity 18, member A                       |
| 1563656_at   | 2.07  | up   | 160.53 | 75.47   |           |                                                                    |
| 1563840_at   | 5.61  | down | 29.53  | 161.47  |           |                                                                    |
| 1564056_at   | 20.98 | up   | 102.18 | 4.75    |           |                                                                    |
| 1564063_a_at | 2.17  | down | 115.09 | 243.77  | ATP11B    | ATPase, class VI, type 11B                                         |
| 1564069_at   | 2.10  | down | 278.28 | 568.51  |           |                                                                    |
| 1564166_s_at | 2.75  | down | 73.80  | 198.06  | PRKRIP1   | PRKR interacting protein 1 (IL11 inducible)                        |
| 1564203_at   | 2.07  | down | 69.77  | 141.08  | LOC147004 | hypothetical protein LOC147004                                     |
| 1564400_at   | 7.49  | up   | 142.41 | 18.53   | C18orf62  | chromosome 18 open reading frame 62                                |
| 1564467_at   | 2.14  | down | 79.01  | 164.92  | FAM161A   | family with sequence similarity 161, member A                      |
| 1564559_at   | 2.17  | down | 62.53  | 132.53  | LOC728073 | hypothetical protein LOC728073                                     |
| 1564568_at   | 7.30  | up   | 155.11 | 20.71   | CRLF1     | cytokine receptor-like factor 1                                    |
| 1564658_at   | 34.67 | up   | 209.98 | 5.91    | C7orf52   | Chromosome 7 open reading frame 52                                 |
| 1564674_a_at | 8.38  | down | 23.14  | 189.01  | CDC20B    | cell division cycle 20 homolog B (S. cerevisiae)                   |
| 1564688_a_at | 5.54  | up   | 108.43 | 19.09   | RAD9B     | RAD9 homolog B (S. pombe)                                          |
| 1564707_x_at | 19.48 | up   | 171.08 | 8.56    | GLS2      | glutaminase 2 (liver, mitochondrial)                               |
| 1564776_at   | 46.35 | up   | 79.07  | 1.66    |           |                                                                    |
| 1564878_at   | 5.22  | down | 29.99  | 152.55  |           |                                                                    |
| 1565132_at   | 3.58  | down | 54.28  | 189.20  | RBM3AP    | RNA binding motif protein, Y-linked, family 3, member A pseudogene |
| 1565162_s_at | 2.59  | down | 417.79 | 1055.40 | MGST1     | microsomal glutathione S-transferase 1                             |

|              |       |      |        |        |           |                                                  |
|--------------|-------|------|--------|--------|-----------|--------------------------------------------------|
| 1565580_s_at | 3.44  | up   | 190.78 | 54.10  | TATDN2    | TatD DNase domain containing 2                   |
| 1565635_at   | 2.19  | up   | 226.16 | 100.49 |           |                                                  |
| 1565696_at   | 3.79  | down | 23.76  | 87.87  |           |                                                  |
| 1565834_a_at | 2.78  | down | 30.96  | 84.01  |           |                                                  |
| 1565837_at   | 3.34  | down | 29.12  | 94.91  |           |                                                  |
| 1566243_at   | 2.12  | down | 84.20  | 174.35 |           |                                                  |
| 1566256_s_at | 2.03  | up   | 155.84 | 74.85  |           |                                                  |
| 1566485_at   | 10.86 | up   | 114.25 | 10.25  |           |                                                  |
| 1566491_at   | 10.99 | up   | 120.93 | 10.73  |           |                                                  |
| 1566603_s_at | 5.48  | down | 38.47  | 205.44 | RPUSD3    | RNA pseudouridylate synthase domain containing 3 |
| 1566764_at   | 3.05  | up   | 115.27 | 36.89  | MACC1     | metastasis associated in colon cancer 1          |
| 1566885_at   | 6.87  | down | 23.80  | 159.43 |           |                                                  |
| 1567213_at   | 2.96  | down | 149.85 | 431.90 | PNN       | pinin, desmosome associated protein              |
| 1568623_a_at | 2.37  | up   | 414.79 | 170.60 | SLC35E4   | solute carrier family 35, member E4              |
| 1568685_at   | 6.24  | down | 16.99  | 103.37 |           |                                                  |
| 1568699_at   | 3.56  | up   | 513.32 | 140.59 | C14orf179 | chromosome 14 open reading frame 179             |
| 1568723_at   | 19.13 | up   | 78.74  | 4.01   | ATP9B     | ATPase, class II, type 9B                        |
| 1568787_at   | 34.92 | up   | 135.76 | 3.79   |           |                                                  |
| 1568789_at   | 5.69  | up   | 167.96 | 28.79  | UHRF1BP1  | UHRF1 binding protein 1                          |
| 1568872_at   | 3.60  | up   | 192.51 | 52.15  |           |                                                  |
| 1568889_at   | 5.16  | up   | 255.80 | 48.32  | FANCD2    | Fanconi anemia, complementation group D2         |
| 1568974_at   | 10.42 | down | 35.82  | 363.82 | NHEG1     | neuroblastoma highly expressed protein 1         |
| 1569039_s_at | 2.51  | up   | 150.57 | 58.57  | ZNF677    | zinc finger protein 677                          |
| 1569112_at   | 12.70 | up   | 151.00 | 11.60  | SLC44A5   | solute carrier family 44, member 5               |
| 1569157_s_at | 3.28  | up   | 248.57 | 73.89  | ZNF846    | zinc finger protein 846                          |
| 1569167_at   | 13.10 | down | 12.18  | 155.58 |           |                                                  |
| 1569180_at   | 2.11  | down | 94.18  | 193.41 |           |                                                  |
| 1569274_at   | 2.90  | up   | 171.16 | 57.54  | C14orf182 | Chromosome 14 open reading frame 182             |



|              |       |      |        |        |           |                                                       |
|--------------|-------|------|--------|--------|-----------|-------------------------------------------------------|
| 1569283_at   | 2.22  | down | 97.20  | 210.75 | CG_164615 | hCG1646157                                            |
| 1569318_at   | 2.83  | up   | 196.00 | 67.57  | LOC284440 | hypothetical LOC284440                                |
| 1569444_at   | 2.01  | down | 86.87  | 170.25 |           |                                                       |
| 1569461_at   | 19.83 | down | 5.62   | 108.60 |           |                                                       |
| 1569484_s_at | 2.53  | down | 94.77  | 233.37 | MDN1      | MDN1, midasin homolog (yeast)                         |
| 1569490_at   | 7.48  | down | 22.79  | 166.26 | FNDC3B    | fibronectin type III domain containing 3B             |
| 1569520_at   | 2.46  | up   | 237.22 | 94.00  |           |                                                       |
| 1569569_x_at | 6.51  | up   | 207.64 | 31.08  |           |                                                       |
| 1569588_x_at | 18.67 | down | 8.56   | 155.78 | PIK3C2A   | Phosphoinositide-3-kinase, class 2, alpha polypeptide |
| 1569665_at   | 2.42  | up   | 193.49 | 77.97  |           |                                                       |
| 1569672_at   | 34.74 | up   | 220.18 | 6.18   |           |                                                       |
| 1569680_at   | 2.58  | up   | 182.15 | 68.96  |           |                                                       |
| 1569706_at   | 18.91 | up   | 126.33 | 6.51   | MYSM1     | Myb-like, SWIRM and MPN domains 1                     |
| 1569761_x_at | 4.75  | up   | 123.86 | 25.43  |           |                                                       |
| 1569815_x_at | 2.60  | down | 47.02  | 119.01 | STRN      | striatin, calmodulin binding protein                  |
| 1569816_at   | 5.20  | up   | 245.48 | 46.00  |           |                                                       |
| 1569975_at   | 51.71 | up   | 140.02 | 2.64   |           |                                                       |
| 1570055_at   | 9.48  | up   | 637.71 | 65.60  | DNM1P33   | DNM1 pseudogene 33                                    |
| 1570093_at   | 3.11  | down | 40.28  | 122.24 |           |                                                       |
| 1570173_at   | 10.15 | down | 8.13   | 80.47  | INTS7     | integrator complex subunit 7                          |
| 1570425_s_at | 7.37  | up   | 131.00 | 17.33  | LATS1     | LATS, large tumor suppressor, homolog 1 (Drosophila)  |
| 1570450_at   | 9.00  | down | 35.97  | 315.78 |           |                                                       |
| 1570484_at   | 2.04  | down | 92.38  | 183.68 |           |                                                       |
| 1570503_at   | 3.11  | down | 46.97  | 142.64 |           |                                                       |
| 1570516_s_at | 2.58  | down | 71.77  | 180.63 | OR51B5    | olfactory receptor, family 51, subfamily B, member 5  |
| 1570578_at   | 13.58 | down | 7.77   | 102.85 |           |                                                       |
