# Supplementary material for: UCHL1 Is a Putative Tumor Suppressor in Ovarian Cancer Cells and Contributes to Cisplatin Resistance
Source: PubMed Central journal article supplement — J Cancer. 2013 Sep 27;4(8):662–70. doi: 10.7150/jca.6641 (PMC3805994; doi:10.7150/jca.6641), 2013-09-27

Suppl. Figure 1. Legend:

A bar chart showing the UCHL1 expression levels in carboplatin resistant and carboplatin sensitive ovarian cancer tissues. Data from the GEO database ([http://www.ncbi.nlm.nih.gov/geo/tools/profileGraph.cgi?ID=GDS1381:36990\\_at](http://www.ncbi.nlm.nih.gov/geo/tools/profileGraph.cgi?ID=GDS1381:36990_at)) [28].

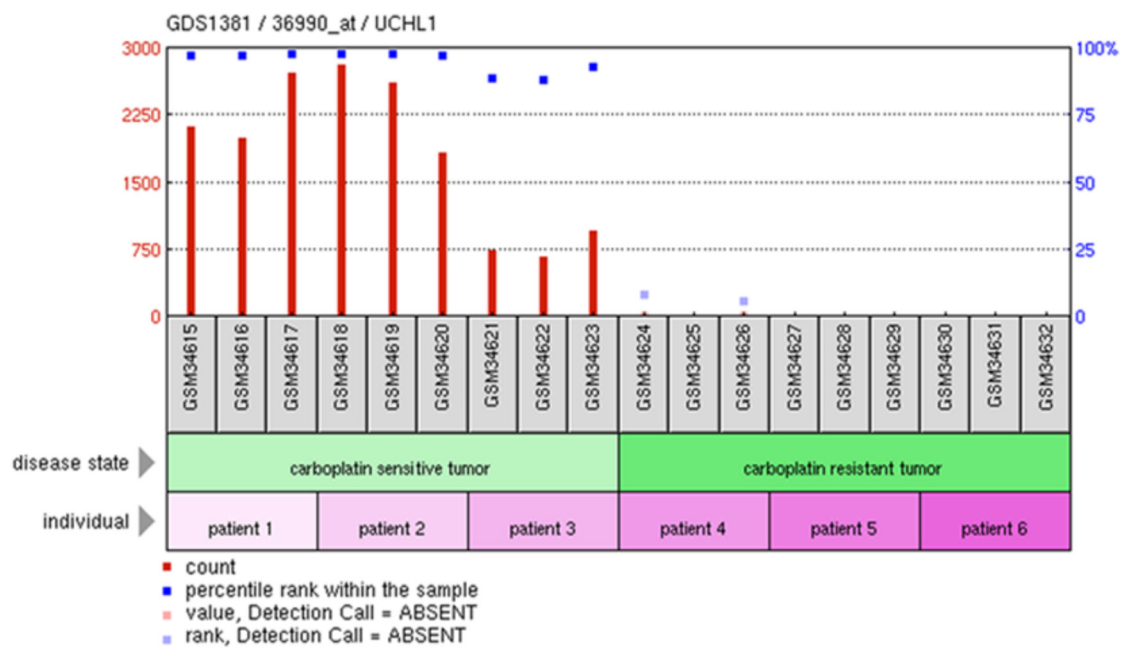

Supplement: jcav04p0662s2.pdf [file jcav04p0662s2.pdf]
